# Supplementary material for: Photoelectrochemical nickel-catalyzed carboacylation/silanoylation of alkenes with unactivated C/Si–H bonds
Source: Royal Society of Chemistry journal article supplement (doi:10.1039/d3gc04109c), 2024-01-01

## Supplementary Information for

# Photoelectrochemical Nickel-Catalyzed Carboacylation/ Silanoylation of Alkenes with Unactivated C/Si–H Bonds

Lanfen Wang<sup>1</sup>, Xiangyu Huo<sup>3</sup>, Xiaozhi He<sup>1</sup>, Lutz Ackermann<sup>2,\*</sup>, and Dingyi Wang<sup>1,\*</sup>

<sup>1</sup>College of Sciences, Northeastern University, Shenyang, 110004, China

<sup>2</sup>Institut für Organische und Biomolekulare Chemie, Georg-August-Universität Göttingen, Göttingen, 37077, Germany

<sup>3</sup>College of Pharmacy, Nankai University, Tianjin, 300350, China

\*e-mail: [wangdingyi@mail.neu.edu.cn](mailto:wangdingyi@mail.neu.edu.cn), [Lutz.Ackermann@chemie.uni-goettingen.de](mailto:Lutz.Ackermann@chemie.uni-goettingen.de)

## TABLE OF CONTENTS

|                                                 |    |
|-------------------------------------------------|----|
| 1. General Experimental Details.....            | 3  |
| 2. Optimization of the Reaction Condition ..... | 4  |
| 3. General Procedures.....                      | 6  |
| 4. Characterization Data of Products.....       | 7  |
| 5. Mechanistic Investigations .....             | 22 |
| 6. Cyclic Voltammetry (CV) Measurements .....   | 27 |
| 7. NMR Spectra.....                             | 28 |

## 1. General Experimental Details

All new compounds were fully characterized. Compounds were visualized by exposure to UV-light. All reactions and manipulations involving air- or moisture-sensitive compounds were performed using standard Schlenk techniques or in a glovebox. Toluene was purified using Pure Solv MD-5 solvent purification system, from Innovative Technology, Inc., by passing the solvent through two activated alumina columns after purging with argon.  $^1\text{H}$ ,  $^{13}\text{C}$ ,  $^{31}\text{P}$  and  $^{19}\text{F}$  NMR spectra were recorded on a Bruker AVANCE III 400 MHz or 500 MHz spectrometer. Chemical shifts ( $\delta$  values) were reported in ppm with  $\text{CDCl}_3$  (7.26 and 77.16 ppm for  $^1\text{H}$  and  $^{13}\text{C}$  respectively). Mass spectra were conducted at Agilent 6540 Ultra-High-Definition (UHD) Accurate-Mass Quadrupole Time-of-Flight (Q-TOF) liquid chromatography/mass spectrometry (LC/MS) system and Thermo Scientific TRACE 1300 ISQ LT gas chromatography/mass spectrometry (GC/MS) system. Unless otherwise noted, materials obtained from commercial suppliers were used without further purification.

## 2. Optimization of the Reaction Condition

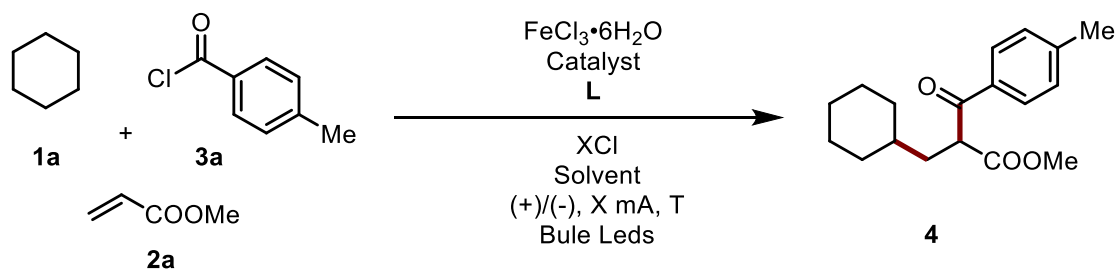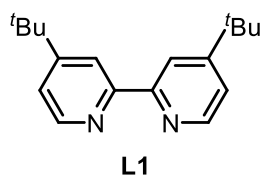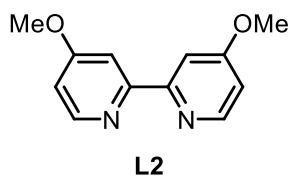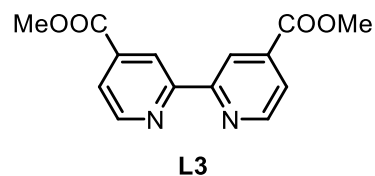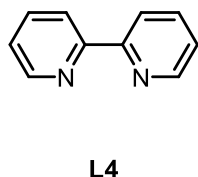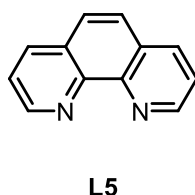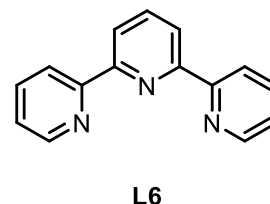

| Entry | 1/2/3 (equiv) | [Ni] (10 mol%)         | L (10 mol%) | Current (X mA) | Electrodes (+)-(-) | Solvent (mL)                    | Yield (%) <sup>[b]</sup> |
|-------|---------------|------------------------|-------------|----------------|--------------------|---------------------------------|--------------------------|
| 1     | 10/3/1        | NiBr <sub>2</sub> ·DME | <b>L1</b>   | 4.0            | GF(+)-RVC(-)       | MeCN/Acetone (2/1, 3 mL)        | 71                       |
| 2     | 10/3/1        | NiBr <sub>2</sub> ·DME | <b>L2</b>   | 4.0            | GF(+)-RVC(-)       | MeCN/Acetone (2/1, 3 mL)        | 26                       |
| 3     | 10/3/1        | NiBr <sub>2</sub> ·DME | <b>L3</b>   | 4.0            | GF(+)-RVC(-)       | MeCN/Acetone (2/1, 3 mL)        | 15                       |
| 4     | 10/3/1        | NiBr <sub>2</sub> ·DME | <b>L4</b>   | 4.0            | GF(+)-RVC(-)       | MeCN/Acetone (2/1, 3 mL)        | 55                       |
| 5     | 10/3/1        | NiBr <sub>2</sub> ·DME | <b>L5</b>   | 4.0            | GF(+)-RVC(-)       | MeCN/Acetone (2/1, 3 mL)        | 22                       |
| 6     | 10/3/1        | NiBr <sub>2</sub> ·DME | <b>L6</b>   | 4.0            | GF(+)-RVC(-)       | MeCN/Acetone (2/1, 3 mL)        | 0                        |
| 7     | 10/3/1        | NiBr <sub>2</sub> ·DME | L1          | 4.0            | GF(+)-RVC(-)       | <b>MeCN (3 mL)</b>              | 42                       |
| 8     | 10/3/1        | NiBr <sub>2</sub> ·DME | L1          | 4.0            | GF(+)-RVC(-)       | <b>Acetone (3 mL)</b>           | 17                       |
| 9     | 10/3/1        | NiBr <sub>2</sub> ·DME | L1          | 4.0            | GF(+)-RVC(-)       | <b>MeCN/Acetone (1/2, 3 mL)</b> | 55                       |

|    |              |                             |    |            |                               |                                     |    |
|----|--------------|-----------------------------|----|------------|-------------------------------|-------------------------------------|----|
| 10 | 10/3/1       | NiBr <sub>2</sub> •DME      | L1 | 4.0        | GF(+)-GF(-)                   | <b>MeCN/Acetone<br/>(1/1, 3 mL)</b> | 64 |
| 11 | 10/3/1       | NiBr <sub>2</sub> •DME      | L1 | 4.0        | GF(+)-RVC(-)                  | <b>DMF<br/>(3 mL)</b>               | 0  |
| 12 | 10/3/1       | NiBr <sub>2</sub> •DME      | L1 | 4.0        | GF(+)-RVC(-)                  | <b>DMA<br/>(3 mL)</b>               | 0  |
| 13 | 10/3/1       | NiBr <sub>2</sub> •DME      | L1 | 4.0        | GF(+)-RVC(-)                  | <b>DMSO<br/>(3 mL)</b>              | 0  |
| 14 | 10/3/1       | NiBr <sub>2</sub> •DME      | L1 | 4.0        | GF(+)-RVC(-)                  | <b>HFIP<br/>(3 mL)</b>              | 0  |
| 15 | 10/3/1       | NiBr <sub>2</sub> •DME      | L1 | 4.0        | GF(+)-RVC(-)                  | <b>TFE<br/>(3 mL)</b>               | 0  |
| 16 | <b>5/3/1</b> | NiBr <sub>2</sub> •DME      | L1 | 4.0        | GF(+)-RVC(-)                  | MeCN/Acetone<br>(2/1, 3 mL)         | 41 |
| 17 | <b>5/1/1</b> | NiBr <sub>2</sub> •DME      | L1 | 4.0        | GF(+)-RVC(-)                  | MeCN/Acetone<br>(2/1, 3 mL)         | 33 |
| 18 | 10/3/1       | NiBr <sub>2</sub> •DME      | L1 | <b>6.0</b> | GF(+)-RVC(-)                  | MeCN/Acetone<br>(2/1, 3 mL)         | 57 |
| 19 | 10/3/1       | NiBr <sub>2</sub> •DME      | L1 | <b>2.0</b> | GF(+)-RVC(-)                  | MeCN/Acetone<br>(2/1, 3 mL)         | 66 |
| 20 | 10/3/1       | NiBr <sub>2</sub> •DME      | L1 | 4.0        | <b>GF(+)-GF (-)</b>           | MeCN/Acetone<br>(2/1, 3 mL)         | 60 |
| 21 | 10/3/1       | NiBr <sub>2</sub> •DME      | L1 | 4.0        | <b>GF(+)-<br/>Ni foam (-)</b> | MeCN/Acetone<br>(2/1, 3 mL)         | 15 |
| 22 | 10/3/1       | NiBr <sub>2</sub> •DME      | L1 | 4.0        | <b>RVC(+)-<br/>RVC(-)</b>     | MeCN/Acetone<br>(2/1, 3 mL)         | 36 |
| 23 | 10/3/1       | NiCl <sub>2</sub> •DME      | L1 | 4.0        | <b>Fe(+)-RVC(-)</b>           | MeCN/Acetone<br>(2/1, 3 mL)         | <5 |
| 24 | 10/3/1       | <b>NiBr<sub>2</sub></b>     | L1 | 4.0        | GF(+)-RVC(-)                  | MeCN/Acetone<br>(2/1, 3 mL)         | 52 |
| 25 | 10/3/1       | <b>NiCl<sub>2</sub>•DME</b> | L1 | 4.0        | GF(+)-RVC(-)                  | MeCN/Acetone<br>(2/1, 3 mL)         | 62 |
| 26 | 10/3/1       | <b>Ni(acac)<sub>2</sub></b> | L1 | 4.0        | GF(+)-RVC(-)                  | MeCN/Acetone<br>(2/1, 3 mL)         | 23 |
| 27 | 10/3/1       | <b>Ni(OAc)<sub>2</sub></b>  | L1 | 4.0        | GF(+)-RVC(-)                  | MeCN/Acetone<br>(2/1, 3 mL)         | 17 |
| 28 | 10/3/1       | NiBr <sub>2</sub> •DME      | L1 | <b>0</b>   | GF(+)-RVC(-)                  | MeCN/Acetone                        | 0  |

|                   |        |                        |    |     |              |                             |    |
|-------------------|--------|------------------------|----|-----|--------------|-----------------------------|----|
|                   |        |                        |    |     |              | (2/1, 3 mL)                 |    |
| 29                | 10/3/1 | -                      | L1 | 4.0 | GF(+)-RVC(-) | MeCN/Acetone<br>(2/1, 3 mL) | 0  |
| 30                | 10/3/1 | NiBr <sub>2</sub> •DME | -  | 4.0 | GF(+)-RVC(-) | MeCN/Acetone<br>(2/1, 3 mL) | 0  |
| 31 <sup>[d]</sup> | 10/3/1 | NiBr <sub>2</sub> •DME | L1 | 4.0 | GF(+)-RVC(-) | MeCN/Acetone<br>(2/1, 3 mL) | 0  |
| 32 <sup>[e]</sup> | 10/3/1 | NiBr <sub>2</sub> •DME | L1 | 4.0 | GF(+)-RVC(-) | MeCN/Acetone<br>(2/1, 3 mL) | 42 |

[a] Reaction conditions: **1a** (2.0 mmol), **2a** (0.6 mmol), **3a** (0.2 mmol), NiBr<sub>2</sub>•DME (10 mol%), FeCl<sub>3</sub>•6H<sub>2</sub>O (10 mol%), dtbbpy (10 mol%), LiCl (3.0 equiv.), anhydrous MeCN/acetone (3.0 mL, 2/1), 4 mA, 24 h, 390 nm, 10 °C, nitrogen, graphite felt (GF) as an anode, reticulated vitreous carbon (RVC) as a cathode, undivided cell. [b] GC yields using dodecane as an internal standard. [c] isolated yields. [d] No blue LEDs. [e] At 30 °C.

### 3. General Procedures

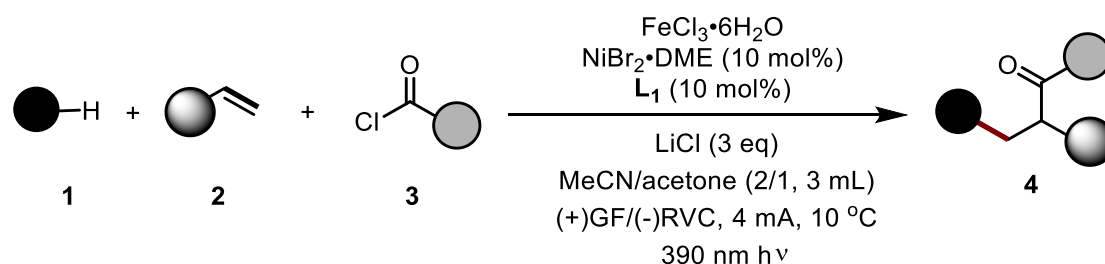

A dry 10 mL vial equipped with a Teflon-coated magnetic stir bar was charged with acyl chlorides (0.30 mmol, 1.0 equiv.), alkanes (3.0 mmol, 10 equiv.) or silanes (1.5 mmol, 5 equiv.), alkenes (0.90 mmol, 3.0 equiv.), LiCl (37.8 mg, 3.0 equiv.) and FeCl<sub>3</sub>•6H<sub>2</sub>O (8.1 mg, 10 mol%) were dissolved in acetone (1.0 mL). Afterward, a pre-catalyst solution (it was prepared by a mix of NiBr<sub>2</sub>•DME (6.6 mg, 10 mol%), 4,4'-di-tert-butyl-2,2'-bipyridine (8.1 mg, 10 mol%) in anhydrous MeCN (2.0 mL) under N<sub>2</sub> atmosphere, and was stirred for 10 minutes.) was added via syringe. Then, it was capped with a Teflon lid equipped with Graphite Felt (20×10×15 mm) as the anode and reticulated vitreous carbon (20×10×1 mm) as the cathode. The reaction mixture was stirred under N<sub>2</sub> and electrolyzed at a constant current of 4 mA under irradiation by a 10-W 390-nm LED lamp with a cooling fan to keep the reaction temperature at 10 °C

for 24 h. After the reaction was completed, the mixture was transferred to a 50 mL round bottom flask, electrodes were washed with ethyl acetate. Then H<sub>2</sub>O (20 mL) was added and the mixture was extracted with EtOAc (20 mL) for three times. The combined organic layer was washed with H<sub>2</sub>O (20 mL) and brine (20 mL). The organic layer was dried with anhydrous Na<sub>2</sub>SO<sub>4</sub>, then concentrated under vacuum. The product was purified by flash column chromatography on silica gel using hexane/EtOAc as eluent.

#### 4. Characterization Data of Products

##### Methyl 2-(cyclohexylmethyl)-3-oxo-3-(p-tolyl)propanoate (4)

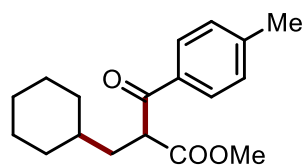

This compound was prepared according to General procedure, 61.3 mg, 71 % yield as a colorless oil. **<sup>1</sup>H NMR (400 MHz, Chloroform-*d*)**  $\delta$  7.89 (d,  $J$  = 8.3 Hz, 2H), 7.28 (d,  $J$  = 7.9 Hz, 2H), 4.44 (dd,  $J$  = 7.9, 6.4 Hz, 1H), 3.68 (s, 3H), 2.42 (s, 3H), 1.87 – 1.66 (m, 6H), 1.19 – 1.13 (m, 2H), 0.95 – 0.80 (m, 5H). **<sup>13</sup>C NMR (101 MHz, Chloroform-*d*)**  $\delta$  195.0, 170.9, 144.5, 133.6, 129.5, 128.8, 52.4, 51.5, 36.5, 35.8, 33.3, 33.0, 29.7, 26.4, 26.1, 21.7. HRMS  $m/z$  (ESI): calcd for C<sub>18</sub>H<sub>25</sub>O<sub>3</sub> (M + H)<sup>+</sup> 289.1798, found 289.1780.

##### Methyl 2-(cyclohexylmethyl)-3-oxo-3-(o-tolyl)propanoate (5)

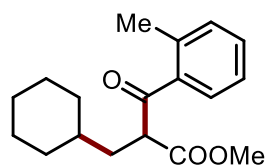

This compound was prepared according to General procedure, 53.6 mg, 62 % yield as a colorless oil. **<sup>1</sup>H NMR (400 MHz, Chloroform-*d*)**  $\delta$  7.72 – 7.63 (m, 1H), 7.40 (td,  $J$  = 7.5, 1.4 Hz, 1H), 7.31 – 7.27 (m, 2H), 4.36 (dd,  $J$  = 8.3, 6.2 Hz, 1H), 3.70 (s, 3H), 2.50 (s, 3H), 1.94 – 1.62 (m, 9H), 1.17 – 1.12 (m, 2H), 0.96 – 0.86 (m, 2H). **<sup>13</sup>C NMR (101 MHz, Chloroform-*d*)**  $\delta$  199.1, 170.8, 138.9, 137.2, 132.0, 131.6, 128.3, 125.7, 54.2, 52.3, 36.3, 35.9, 33.3, 32.9, 26.4, 26.1, 26.1, 21.0. HRMS  $m/z$  (ESI): calcd for C<sub>18</sub>H<sub>25</sub>O<sub>3</sub> (M + H)<sup>+</sup> 289.1798, found 289.1799.

##### Methyl 2-(cyclohexylmethyl)-3-oxo-3-(m-tolyl)propanoate (6)

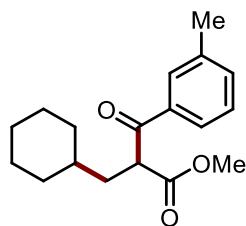

This compound was prepared according to General procedure, 63.9 mg, 74 % yield as a colorless oil.  $^1\text{H NMR}$  (400 MHz, Chloroform-*d*)  $\delta$  7.83 – 7.71 (m, 2H), 7.43 – 7.32 (m, 2H), 4.44 (dd,  $J = 7.9, 6.4$  Hz, 1H), 3.68 (s, 3H), 2.42 (s, 3H), 1.98 – 1.77 (m, 3H), 1.71 – 1.60 (m, 4H), 1.28 – 1.17 (m, 4H), 0.98 – 0.87 (m, 2H).  $^{13}\text{C NMR}$  (101 MHz, Chloroform-*d*)  $\delta$  195.5, 170.8, 138.7, 136.2, 134.3, 129.1, 128.6, 125.8, 52.4, 51.6, 36.5, 35.9, 33.3, 33.0, 26.4, 26.2, 26.1, 21.4. HRMS  $m/z$  (ESI): calcd for  $\text{C}_{18}\text{H}_{25}\text{O}_3$  ( $M + \text{H}$ ) $^+$  289.1798, found 289.1798.

### Methyl 2-(cyclohexylmethyl)-3-oxo-3-phenylpropanoate (7)

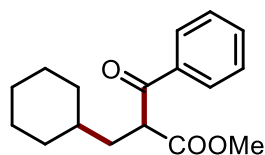

This compound was prepared according to General procedure, 56.7 mg, 69 % yield as a colorless oil.  $^1\text{H NMR}$  (400 MHz, Chloroform-*d*)  $\delta$  7.99 (dd,  $J = 8.4, 1.4$  Hz, 2H), 7.58 (d,  $J = 7.6$  Hz, 1H), 7.48 (dd,  $J = 8.3, 7.1$  Hz, 2H), 4.47 (dd,  $J = 7.9, 6.3$  Hz, 1H), 3.69 (s, 3H), 1.95 – 1.60 (m, 7H), 1.31 – 1.10 (m, 4H), 0.96 – 0.93 (m, 2H).  $^{13}\text{C NMR}$  (101 MHz, Chloroform-*d*)  $\delta$  195.3, 170.7, 136.0, 128.7, 128.5, 52.4, 51.5, 36.4, 35.7, 33.2, 32.9, 26.3, 26.0. HRMS  $m/z$  (ESI): calcd for  $\text{C}_{17}\text{H}_{23}\text{O}_3$  ( $M + \text{H}$ ) $^+$  275.1642, found 275.1643.

### Methyl 2-(cyclohexylmethyl)-3-(naphthalen-2-yl)-3-oxopropanoate (8)

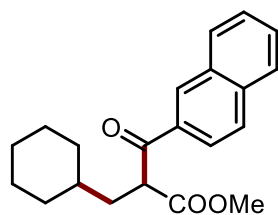

This compound was prepared according to General procedure, 58.3 mg, 60 % yield as a colorless oil.  $^1\text{H NMR}$  (400 MHz, Chloroform-*d*)  $\delta$  8.57 – 8.52 (m, 1H), 8.07 – 8.05 (m, 2H), 7.95 – 7.90 (m, 2H), 7.67 – 7.58 (m, 2H), 4.65 (dd,  $J = 7.8, 6.5$  Hz, 1H), 3.72 (s, 3H), 2.04 – 1.95 (m, 2H), 1.90 – 1.84 (m, 1H), 1.75 – 1.64 (m, 4H), 1.35 – 1.18 (m, 4H), 1.02 – 0.94 (m, 2H).  $^{13}\text{C NMR}$  (101 MHz, Chloroform-*d*)  $\delta$  195.3, 170.8, 135.8, 133.5, 132.5, 130.5, 129.8, 128.8, 128.7, 127.8, 126.9, 124.2, 52.5, 51.6, 36.6, 35.9, 33.3, 33.1, 26.4, 26.1. HRMS  $m/z$  (ESI): calcd for  $\text{C}_{21}\text{H}_{25}\text{O}_3$  ( $M + \text{H}$ ) $^+$  325.1798, found 325.1800.

### Methyl 3-(4-(tert-butyl)phenyl)-2-(cyclohexylmethyl)-3-oxopropanoate (9)



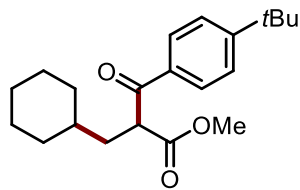

This compound was prepared according to General procedure, 65.3 mg, 66 % yield as a colorless oil. **<sup>1</sup>H NMR (400 MHz, Chloroform-*d*)**  $\delta$  7.93 (d,  $J = 8.6$  Hz, 2H), 7.49 (d,  $J = 8.6$  Hz, 2H), 4.44 (dd,  $J = 7.9, 6.4$  Hz, 1H), 3.69 (s, 3H), 1.98 – 1.78 (m, 3H), 1.72 – 1.70 (m, 4H), 1.34 (s, 9H), 1.22 – 1.12 (m, 4H), 0.97 – 0.89 (m, 2H). **<sup>13</sup>C NMR (101 MHz, Chloroform-*d*)**  $\delta$  194.9, 170.9, 157.3, 133.5, 128.6, 125.7, 52.4, 51.5, 36.5, 35.9, 35.2, 33.3, 33.0, 31.0, 26.4, 26.1. HRMS  $m/z$  (ESI): calcd for C<sub>21</sub>H<sub>31</sub>O<sub>3</sub> (M + H)<sup>+</sup> 331.2268, found 331.2270.

### Methyl 2-(cyclohexylmethyl)-3-(4-methoxyphenyl)-3-oxopropanoate (10)

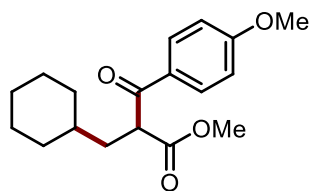

This compound was prepared according to General procedure, 65.7 mg, 72 % yield as a colorless oil. **<sup>1</sup>H NMR (400 MHz, Chloroform-*d*)**  $\delta$  7.97 (d,  $J = 8.7$  Hz, 2H), 6.94 (d,  $J = 8.7$  Hz, 2H), 4.41 (t,  $J = 7.2$  Hz, 1H), 3.87 (s, 3H), 3.67 (s, 3H), 1.95 – 1.78 (m, 3H), 1.66 (d,  $J = 12.6$  Hz, 4H), 1.26 – 1.18 (m, 4H), 0.95 – 0.85 (m, 2H). **<sup>13</sup>C NMR (101 MHz, Chloroform-*d*)**  $\delta$  193.7, 170.5, 131.4, 131.3, 116.0, 115.8, 52.5, 51.6, 36.4, 35.8, 33.3, 33.0, 26.4, 26.1. HRMS  $m/z$  (ESI): calcd for C<sub>18</sub>H<sub>25</sub>O<sub>4</sub> (M + H)<sup>+</sup> 305.1747, found 305.1747.

### Methyl 2-(cyclohexylmethyl)-3-(3-methoxyphenyl)-3-oxopropanoate (11)

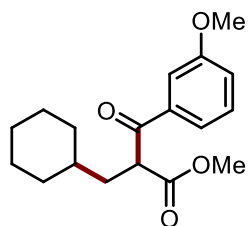

This compound was prepared according to General procedure, 49.2 mg, 72 % yield as a colorless oil. **<sup>1</sup>H NMR (400 MHz, Chloroform-*d*)**  $\delta$  7.58 – 7.57 (m, 1H), 7.52 – 7.51 (m, 1H), 7.41 – 7.37 (m, 1H), 7.15 – 7.12 (m, 1H), 4.45 – 4.42 (m, 1H), 3.86 (s, 3H), 3.69 (s, 3H), 1.74 – 1.61 (m, 5H), 1.16 – 1.09 (m, 2H), 0.97 – 0.83 (m, 6H). **<sup>13</sup>C NMR (101 MHz, Chloroform-*d*)**  $\delta$  195.2, 160.0, 137.4, 129.8, 121.2, 120.2, 112.7, 55.5, 52.5, 51.7, 36.5, 35.8, 33.3, 33.0, 29.7, 26.4, 26.1. HRMS  $m/z$  (ESI): calcd for C<sub>18</sub>H<sub>25</sub>O<sub>4</sub> (M + H)<sup>+</sup> 305.1747, found 305.1747.

### Methyl 2-(cyclohexylmethyl)-3-oxo-3-(4-(trifluoromethyl)phenyl)propanoate (12)

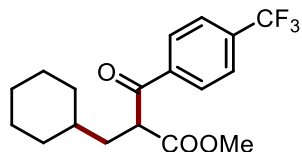

This compound was prepared according to General procedure, 52.3 mg, 51 % yield as a colorless oil. **<sup>1</sup>H NMR (400 MHz, Chloroform-*d*)**  $\delta$  8.09 – 7.96 (m, 2H), 7.80 – 7.55 (m, 2H), 4.36 (dd,  $J = 7.7, 6.5$  Hz, 1H), 3.62 (s, 3H), 1.95 – 1.55 (m, 8H), 1.14 – 1.02 (m, 3H), 0.90 – 0.81 (m, 2H). **<sup>13</sup>C NMR (101 MHz, Chloroform-*d*)**  $\delta$  194.4, 170.3, 138.8, 128.9, 125.9 (d,  $J = 4.1$  Hz), 52.7, 51.9, 36.2, 35.8, 33.2, 33.0, 26.3, 26.1. **<sup>19</sup>F NMR (376 MHz, Chloroform-*d*)**  $\delta$  -63.21. HRMS  $m/z$  (ESI): calcd for C<sub>18</sub>H<sub>22</sub>F<sub>3</sub>O<sub>3</sub> (M + H)<sup>+</sup> 343.1516, found 343.1519.

### Methyl 4-(2-(cyclohexylmethyl)-3-methoxy-3-oxopropanoyl)benzoate (13)

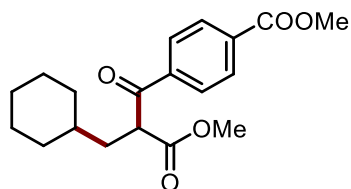

This compound was prepared according to General procedure, 44.8 mg, 45 % yield as a colorless oil. **<sup>1</sup>H NMR (400 MHz, Chloroform-*d*)**  $\delta$  8.14 (d,  $J = 8.4$  Hz, 2H), 8.02 (d,  $J = 8.5$  Hz, 2H), 4.44 (dd,  $J = 7.8, 6.5$  Hz, 1H), 3.95 (s, 3H), 3.68 (s, 3H), 1.94 – 1.84 (m, 2H), 1.80 – 1.76 (m, 4H), 1.22 – 1.11 (m, 3H), 0.97 – 0.80 (m, 4H). **<sup>13</sup>C NMR (101 MHz, Chloroform-*d*)**  $\delta$  194.9, 170.4, 139.4, 134.2, 130.0, 128.5, 52.53, 52.48, 52.0, 36.3, 35.8, 33.3, 33.0, 26.3, 26.1. **MS (EI)  $m/z$  (relative intensity):** 234 [M]<sup>+</sup> (100). HRMS  $m/z$  (ESI): calcd for C<sub>19</sub>H<sub>25</sub>O<sub>5</sub> (M + H)<sup>+</sup> 333.1697, found 333.1698.

### Methyl 2-(cyclohexylmethyl)-3-(4-fluorophenyl)-3-oxopropanoate (14)

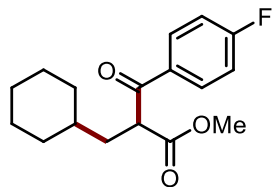

This compound was prepared according to General procedure, 61.3 mg, 70 % yield as a colorless oil. **<sup>1</sup>H NMR (400 MHz, Chloroform-*d*)**  $\delta$  8.04 (dd,  $J = 8.7, 5.4$  Hz, 2H), 7.17 (t,  $J = 8.6$  Hz, 2H), 4.42 (dd,  $J = 7.8, 6.5$  Hz, 1H), 3.70 (s, 3H), 2.03 – 1.78 (m, 3H), 1.72 – 1.62 (m, 4H), 1.29 – 1.21 (m, 4H), 1.00 – 0.89 (m, 2H). **<sup>13</sup>C NMR (101 MHz, Chloroform-*d*)**  $\delta$  193.7, 170.5, 166.0 (d,  $J = 255.8$  Hz), 132.6 (d,  $J = 3.0$  Hz), 131.3 (d,  $J = 9.5$  Hz), 115.9 (d,  $J = 22.0$  Hz), 52.5, 51.6, 36.4, 35.8, 33.3, 33.0, 26.3, 26.1. HRMS  $m/z$  (ESI): calcd for C<sub>17</sub>H<sub>22</sub>O<sub>3</sub>F (M + H)<sup>+</sup> 293.1547, found 293.1547.

### Methyl 3-(4-chlorophenyl)-2-(cyclohexylmethyl)-3-oxopropanoate (15)

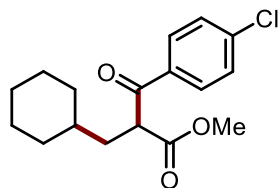

This compound was prepared according to General procedure, 53.6 mg, 58 % yield as a colorless oil.  $^1\text{H NMR}$  (400 MHz, Chloroform-*d*)  $\delta$  8.07 – 7.98 (m, 2H), 7.15 (t,  $J$  = 8.6 Hz, 2H), 4.43 – 4.37 (m, 1H), 3.68 (s, 3H), 1.99 – 1.69 (m, 8H), 1.21 – 1.11 (m, 3H), 0.96 – 0.88 (m, 2H).  $^{13}\text{C NMR}$  (101 MHz, Chloroform-*d*)  $\delta$  193.7, 170.5, 131.4, 131.3, 116.0, 115.8, 52.5, 51.6, 36.4, 35.8, 33.3, 33.0, 26.4, 26.1. HRMS  $m/z$  (ESI): calcd for  $\text{C}_{17}\text{H}_{22}\text{O}_3\text{Cl}$  ( $M + \text{H}$ ) $^+$  309.1252, found 309.1253.

### Methyl 3-(4-(chloromethyl)phenyl)-2-(cyclohexylmethyl)-3-oxopropanoate (16)

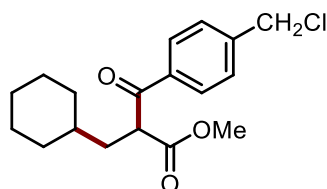

This compound was prepared according to General procedure, 30.9 mg, 32 % yield as a colorless oil.  $^1\text{H NMR}$  (400 MHz, Chloroform-*d*)  $\delta$  7.98 (d,  $J$  = 8.4 Hz, 2H), 7.50 (d,  $J$  = 8.4 Hz, 2H), 4.62 (s, 2H), 4.43 (dd,  $J$  = 7.8, 6.5 Hz, 1H), 3.68 (s, 3H), 1.96 – 1.79 (m, 3H), 1.71 – 1.63 (m, 4H), 1.29 – 1.23 (m, 4H), 0.97 – 0.87 (m, 2H).  $^{13}\text{C NMR}$  (101 MHz, Chloroform-*d*)  $\delta$  194.7, 170.6, 142.8, 135.9, 129.1, 128.9, 52.5, 51.7, 45.2, 36.4, 35.8, 33.3, 33.0, 26.4, 26.1. HRMS  $m/z$  (ESI): calcd for  $\text{C}_{18}\text{H}_{24}\text{O}_3\text{F}$  ( $M + \text{H}$ ) $^+$  323.1408, found 323.1409.

### Methyl 2-(cyclohexylmethyl)-3-(furan-2-yl)-3-oxopropanoate (17)

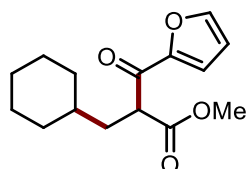

This compound was prepared according to General procedure, 43.6 mg, 55 % yield as a colorless oil.  $^1\text{H NMR}$  (400 MHz, Chloroform-*d*)  $\delta$  8.15 (dd,  $J$  = 2.8, 1.3 Hz, 1H), 7.57 (dd,  $J$  = 5.1, 1.3 Hz, 1H), 7.33 (dd,  $J$  = 5.1, 2.9 Hz, 1H), 4.28 – 4.22 (m, 1H), 3.69 (s, 3H), 1.97 – 1.84 (m, 2H), 1.72 – 1.67 (m, 5H), 1.23 – 1.13 (m, 4H), 0.97 – 0.88 (m, 2H).  $^{13}\text{C NMR}$  (101 MHz, Chloroform-*d*)  $\delta$  189.1, 170.6, 141.3, 133.1, 127.3, 126.6, 53.5, 52.5, 36.3, 35.8, 33.3, 33.0, 26.37, 26.07. HRMS  $m/z$  (ESI): calcd for  $\text{C}_{15}\text{H}_{21}\text{O}_4$  ( $M + \text{H}$ ) $^+$  265.1434, found 265.1438.

### Methyl 3-(benzofuran-5-yl)-2-(cyclohexylmethyl)-3-oxopropanoate (18)

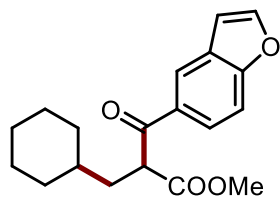

This compound was prepared according to General procedure, 65.9 mg, 70 % yield as a colorless oil.  $^1\text{H NMR}$  (400 MHz, Chloroform-*d*)  $\delta$  8.31 (d,  $J = 1.9$  Hz, 1H), 8.00 (dd,  $J = 8.7, 1.9$  Hz, 1H), 7.71 (d,  $J = 2.2$  Hz, 1H), 7.57 (dt,  $J = 8.8, 0.8$  Hz, 1H), 6.88 (dd,  $J = 2.2, 1.0$  Hz, 1H), 4.55 (dd,  $J = 7.9, 6.5$  Hz, 1H), 3.69 (s, 3H), 2.03 – 1.89 (m, 2H), 1.86 – 1.59 (m, 6H), 1.30 – 1.16 (m, 3H), 0.99 – 0.92 (m, 2H).  $^{13}\text{C NMR}$  (101 MHz, Chloroform-*d*)  $\delta$  194.7, 170.8, 157.6, 146.5, 131.5, 127.6, 125.2, 122.9, 111.7, 107.3, 52.4, 51.5, 36.5, 35.7, 33.2, 32.9, 26.3, 26.0. HRMS  $m/z$  (ESI): calcd for  $\text{C}_{19}\text{H}_{23}\text{O}_4$  ( $M + \text{H}$ ) $^+$  315.1591, found 315.1597.

### Ethyl 2-(3-methylbenzoyl)-4-oxooctanoate (19)

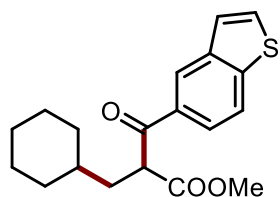

This compound was prepared according to General procedure, 62.4 mg, 63 % yield as a colorless oil.  $^1\text{H NMR}$  (400 MHz, Chloroform-*d*)  $\delta$  8.48 (d,  $J = 1.1$  Hz, 1H), 7.97 (d,  $J = 1.4$  Hz, 2H), 7.55 (d,  $J = 5.4$  Hz, 1H), 7.47 (d,  $J = 5.5$  Hz, 1H), 4.56 (t,  $J = 7.2$  Hz, 1H), 3.69 (s, 3H), 2.02 – 1.90 (m, 2H), 1.86 – 1.79 (m, 1H), 1.76 – 1.63 (m, 4H), 1.35 – 1.31 (m, 1H), 1.22 – 1.09 (m, 3H), 0.99 – 0.92 (m, 2H).  $^{13}\text{C NMR}$  (101 MHz, Chloroform-*d*)  $\delta$  195.2, 170.9, 144.7, 139.5, 132.7, 128.1, 124.8, 124.7, 123.7, 122.9, 52.6, 51.7, 36.6, 35.9, 33.3, 33.1, 26.4, 26.1. HRMS  $m/z$  (ESI): calcd for  $\text{C}_{19}\text{H}_{23}\text{O}_3\text{S}$  ( $M + \text{H}$ ) $^+$  331.1362, found 331.1366.

### Methyl 2-(cyclopentylmethyl)-3-oxo-3-(p-tolyl)propanoate (20)

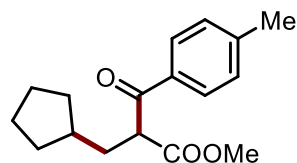

This compound was prepared according to General procedure, 59.1 mg, 72 % yield as a colorless oil.  $^1\text{H NMR}$  (400 MHz, Chloroform-*d*)  $\delta$  7.90 (d,  $J = 8.3$  Hz, 2H), 7.29 (d,  $J = 8.3$  Hz, 2H), 4.41 – 4.32 (m, 1H), 3.68 (s, 3H), 2.42 (s, 3H), 2.10 – 2.01 (m, 2H), 1.77 – 1.45 (m, 7H), 1.15 – 1.12 (m, 2H).  $^{13}\text{C NMR}$  (101 MHz, Chloroform-*d*)  $\delta$  195.0, 170.8, 144.5, 133.7, 130.7, 129.5, 128.8, 53.2, 52.4, 38.3, 35.3,

32.6 (d,  $J = 4.4$  Hz), 25.0, 21.7. HRMS  $m/z$  (ESI): calcd for  $C_{17}H_{23}O_3$  ( $M + H$ )<sup>+</sup> 275.1642, found 275.1642.

### Methyl 2-(bicyclo[2.2.1]heptan-2-ylmethyl)-3-oxo-3-phenylpropanoate (21)

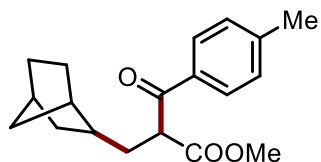

This compound was prepared according to General procedure, 53.2 mg, 62 % yield as a colorless oil. <sup>1</sup>H NMR (400 MHz, Chloroform-*d*)  $\delta$  7.95 – 7.87 (m, 2H), 7.31 – 7.29 (m, 2H), 4.39 – 4.31 (m, 1H), 3.69 (d,  $J = 4.5$  Hz, 3H), 2.44 (s, 3H), 2.23 – 2.21 (m, 1H), 2.07 – 1.97 (m, 2H), 1.84 – 1.71 (m, 1H), 1.51 – 1.32 (m, 5H), 1.12 – 1.05 (m, 4H). <sup>13</sup>C NMR (101 MHz, Chloroform-*d*)  $\delta$  195.1, 195.0, 170.84, 170.80, 144.5, 129.6, 129.5, 128.77, 128.75, 52.4, 52.3, 52.2, 41.2, 41.1, 40.13, 40.05, 38.0, 37.9, 36.6, 35.9, 35.3, 35.3, 29.9, 28.6, 28.6, 21.7. HRMS  $m/z$  (ESI): calcd for  $C_{18}H_{23}O_3$  ( $M + H$ )<sup>+</sup> 287.1642, found 287.1642.

### Methyl 2-((7-oxabicyclo[2.2.1]heptan-2-yl)methyl)-3-oxo-3-phenylpropanoate (22)

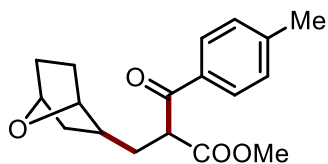

This compound was prepared according to General procedure, 43.2 mg, 50 % yield as a colorless oil. <sup>1</sup>H NMR (400 MHz, Chloroform-*d*)  $\delta$  7.93 – 7.86 (m, 2H), 7.31 – 7.28 (m, 2H), 4.57 (q,  $J = 5.1$  Hz, 1H), 4.38 – 4.23 (m, 2H), 3.70 (d,  $J = 4.4$  Hz, 3H), 2.44 (s, 3H), 2.17 (dd,  $J = 14.0, 7.4$  Hz, 1H), 1.91 – 1.85 (m, 1H), 1.77 – 1.59 (m, 7H), 1.40 – 1.36 (m, 1.6 Hz, 2H). <sup>13</sup>C NMR (101 MHz, Chloroform-*d*)  $\delta$  194.6, 194.5, 170.53, 170.51, 144.7, 144.6, 133.7, 133.6, 129.6, 128.8, 128.7, 80.2, 80.0, 76.54, 76.53, 52.5, 51.9, 51.7, 41.4, 41.3, 37.9, 37.9, 34.5, 29.7, 29.6, 29.6, 29.5, 21.7. HRMS  $m/z$  (ESI): calcd for  $C_{18}H_{23}O_4$  ( $M + H$ )<sup>+</sup> 303.1591, found 303.1595.

### Methyl -3-oxo-3-phenyl-2-((tetrahydrofuran-2-yl)methyl)propanoate (23)

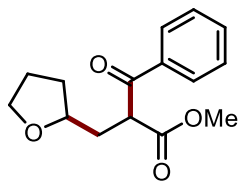

This compound was prepared according to General procedure, 44.0 mg, 56 % yield as a colorless oil. **<sup>1</sup>H NMR (400 MHz, Chloroform-*d*)**  $\delta$  8.08 – 7.97 (m, 2H), 7.61 – 7.54 (m, 1H), 7.50 – 7.43 (m, 2H), 4.70 – 4.63 (m, 1H), 3.98 – 3.74 (m, 2H), 3.73 – 3.62 (m, 4H), 2.35 – 2.31 (m, 1H), 2.15 – 1.81 (m, 4H), 1.55 – 1.49 (m, 1H). **<sup>13</sup>C NMR (101 MHz, Chloroform-*d*)**  $\delta$  195.5, 195.4, 170.5, 170.4, 136.6, 133.5, 133.4, 128.8, 128.8, 128.7, 76.8, 76.4, 67.6, 67.6, 52.5, 52.4, 51.3, 50.8, 35.2, 35.0, 31.5, 31.5, 29.7, 25.7, 25.6. HRMS *m/z* (ESI): calcd for C<sub>15</sub>H<sub>19</sub>O<sub>4</sub> (M + H)<sup>+</sup> 263.1278, found 263.1279.

#### Methyl 2-((1,4-dioxan-2-yl)methyl)-3-oxo-3-phenylpropanoate (24)

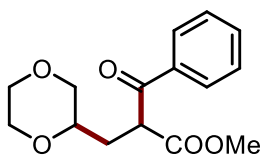

This compound was prepared according to General procedure, 26.6 mg, 32 % yield as colorless oil. **<sup>1</sup>H NMR (400 MHz, Chloroform-*d*)**  $\delta$  8.05 – 8.01 (m, 2H), 7.64 – 7.55 (m, 1H), 7.52 – 7.47 (m, 2H), 4.72 – 4.68 (m, 1H), 3.82 – 3.52 (m, 9H), 3.32 – 3.24 (m, 1H), 2.24 – 2.14 (m, 1H), 2.06 – 1.91 (m, 1H). **<sup>13</sup>C NMR (101 MHz, Chloroform-*d*)**  $\delta$  195.3, 170.4, 133.7, 133.6, 128.9, 128.8, 73.3, 72.6, 71.1, 71.0, 66.8, 66.6, 66.4, 66.4, 52.6, 52.6, 49.6, 48.9, 30.8, 30.7, 29.7, 29.3. HRMS *m/z* (ESI): calcd for C<sub>15</sub>H<sub>19</sub>O<sub>5</sub> (M + H)<sup>+</sup> 279.1227, found 279.1230.

#### Methyl 3-oxo-2-((3-oxocyclopentyl)methyl)-3-phenylpropanoate (25)

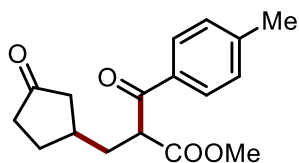

This compound was prepared according to General procedure, 35.4 mg, 41 % yield as colorless oil. **<sup>1</sup>H NMR (400 MHz, Chloroform-*d*)**  $\delta$  7.90 (d, *J* = 8.2 Hz, 2H), 7.29 (d, *J* = 8.2 Hz, 2H), 4.44 – 4.32 (m, 1H), 3.69 (s, 3H), 2.43 (s, 3H), 2.39 – 2.06 (m, 7H), 1.87 – 1.75 (m, 1H), 1.58 – 1.52 (m, 1H). **<sup>13</sup>C NMR (101 MHz, Chloroform-*d*)**  $\delta$  218.4, 194.1, 144.9, 144.9, 129.6, 128.7, 52.6, 52.3, 52.1, 44.9, 44.8, 38.5, 35.3, 35.3, 34.61, 34.58, 29.5, 29.5, 21.7. HRMS *m/z* (ESI): calcd for C<sub>16</sub>H<sub>19</sub>O<sub>4</sub> (M + H)<sup>+</sup> 275.1278, found 275.1279.

#### Ethyl 2-(cyclohexylmethyl)-3-oxo-3-(*p*-tolyl)propanoate (26)

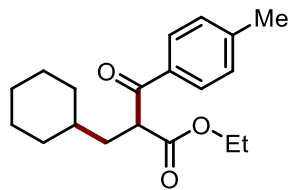

This compound was prepared according to General procedure, 63.4 mg, 70 % yield as colorless oil. **<sup>1</sup>H NMR (400 MHz, Chloroform-*d*)**  $\delta$  7.89 (d,  $J = 6.5$  Hz, 2H), 7.27 (d,  $J = 7.4$  Hz, 2H), 4.44 – 4.37 (m, 1H), 4.14 (q,  $J = 7.1$  Hz, 2H), 2.41 (s, 3H), 2.01 – 1.80 (m, 3H), 1.72 – 1.60 (m, 4H), 1.33 – 1.24 (m, 2H), 1.22-1.16 (m, 5H), 0.96 – 0.85 (m, 2H). **<sup>13</sup>C NMR (101 MHz, Chloroform-*d*)**  $\delta$  195.0, 170.3, 144.3, 133.6, 129.4, 128.7, 61.2, 51.6, 36.3, 35.8, 33.3, 32.9, 26.3, 26.1, 26.0, 21.6, 14.0. HRMS  $m/z$  (ESI): calcd for C<sub>19</sub>H<sub>27</sub>O<sub>3</sub> (M + H)<sup>+</sup> 303.1955, found 303.1955.

### Tert-butyl 2-(cyclohexylmethyl)-3-oxo-3-(p-tolyl)propanoate (27)

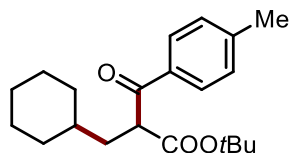

This compound was prepared according to General procedure, 72.2 mg, 73 % yield as colorless oil. **<sup>1</sup>H NMR (400 MHz, Chloroform-*d*)**  $\delta$  7.81 (d,  $J = 8.4$  Hz, 2H), 7.19 (d,  $J = 7.9$  Hz, 2H), 4.19 (dd,  $J = 7.7, 6.6$  Hz, 1H), 2.34 (s, 3H), 1.82 – 1.55 (m, 8H), 1.37 (d,  $J = 2.3$  Hz, 1H), 1.28 (s, 9H), 1.12 – 1.06 (m, 2H), 0.89 – 0.80 (m, 2H). **<sup>13</sup>C NMR (101 MHz, Chloroform-*d*)**  $\delta$  195.3, 169.6, 144.0, 134.0, 129.3, 128.7, 81.5, 52.9, 36.1, 35.8, 33.4, 33.1, 29.7, 27.8, 26.4, 26.2, 21.6. HRMS  $m/z$  (ESI): calcd for C<sub>21</sub>H<sub>31</sub>O<sub>3</sub> (M + H)<sup>+</sup> 331.2268, found 331.2268.

### Isobutyl 2-(cyclohexylmethyl)-3-oxo-3-(p-tolyl)propanoate (28)

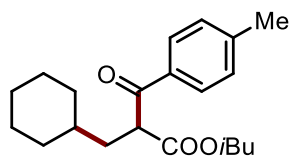

This compound was prepared according to General procedure, 67.3 mg, 68 % yield as colorless oil. **<sup>1</sup>H NMR (400 MHz, Chloroform-*d*)**  $\delta$  7.90 (d,  $J = 8.3$  Hz, 2H), 7.27 (d,  $J = 8.0$  Hz, 2H), 4.42 (dd,  $J = 7.8, 6.5$  Hz, 1H), 3.86 (dd,  $J = 6.6, 2.8$  Hz, 2H), 2.41 (s, 3H), 1.97 – 1.79 (m, 4H), 1.72 – 1.63 (m, 4H), 1.20 – 1.11 (m, 3H), 0.98 – 0.88 (m, 3H), 0.82 (dd,  $J = 6.7, 1.1$  Hz, 6H). **<sup>13</sup>C NMR (101 MHz, Chloroform-*d*)**  $\delta$  194.9, 170.5, 144.3, 133.8, 129.4, 128.7, 71.3, 51.7, 36.3, 35.8, 33.3, 33.0, 29.7, 27.6, 26.4, 26.1, 21.7, 18.9. **MS (EI)  $m/z$  (relative intensity):** 234 [M]<sup>+</sup> (100). HRMS  $m/z$  (ESI): calcd for C<sub>21</sub>H<sub>31</sub>O<sub>3</sub> (M + H)<sup>+</sup> 331.2268, found 331.2269.

### Cyclohexyl 2-(cyclohexylmethyl)-3-oxo-3-(p-tolyl)propanoate (29)

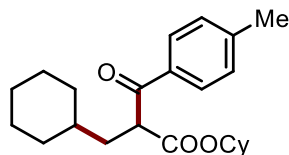

This compound was prepared according to General procedure, 66.2 mg, 62 % yield as colorless oil.  $^1\text{H NMR}$  (400 MHz, Chloroform-*d*)  $\delta$  7.89 (d,  $J = 8.3$  Hz, 2H), 7.26 (d,  $J = 8.0$  Hz, 2H), 4.78 (dt,  $J = 8.6, 4.4$  Hz, 1H), 4.36 (dd,  $J = 8.0, 6.4$  Hz, 1H), 2.41 (s, 3H), 1.95 – 1.80 (m, 3H), 1.76 – 1.62 (m, 7H), 1.36 – 1.32 (m, 3H), 1.23 – 1.08 (m, 5H), 0.99 – 0.85 (m, 3H).  $^{13}\text{C NMR}$  (101 MHz, Chloroform-*d*)  $\delta$  195.0, 169.9, 144.2, 133.9, 129.3, 128.7, 73.3, 52.1, 36.2, 35.8, 33.4, 33.0, 31.3, 31.1, 29.7, 26.4, 26.2, 26.1, 25.3, 23.4, 21.7. HRMS  $m/z$  (ESI): calcd for  $\text{C}_{23}\text{H}_{33}\text{O}_3$  ( $\text{M} + \text{H}$ ) $^+$  357.2424, found 357.2425.

### Benzyl 2-(cyclohexylmethyl)-3-oxo-3-(p-tolyl)propanoate (30)

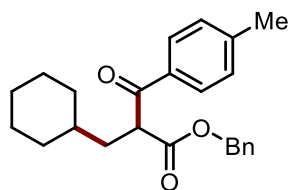

This compound was prepared according to General procedure, 65.5 mg, 60 % yield as colorless oil.  $^1\text{H NMR}$  (400 MHz, Chloroform-*d*)  $\delta$  7.86 (d,  $J = 8.1$  Hz, 2H), 7.32 – 7.20 (m, 7H), 5.12 (s, 2H), 4.45 (dd,  $J = 8.2, 6.2$  Hz, 1H), 2.40 (s, 3H), 1.99 – 1.77 (m, 3H), 1.70 – 1.59 (m, 4H), 1.24 – 1.08 (m, 4H), 0.86 – 0.96 (m, 2H).  $^{13}\text{C NMR}$  (101 MHz, Chloroform-*d*)  $\delta$  194.8, 170.3, 144.4, 135.6, 133.6, 129.5, 128.8, 128.5, 128.2, 128.1, 66.9, 51.7, 36.4, 35.8, 33.4, 32.9, 26.4, 26.1, 26.1, 21.7. HRMS  $m/z$  (ESI): calcd for  $\text{C}_{24}\text{H}_{29}\text{O}_3$  ( $\text{M} + \text{H}$ ) $^+$  365.2111, found 365.2120.

### Phenyl 2-(cyclohexylmethyl)-3-oxo-3-(p-tolyl)propanoate (31)

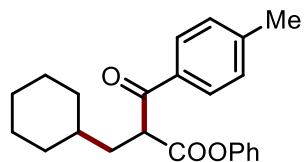

This compound was prepared according to General procedure, 56.7 mg, 54 % yield as colorless oil.  $^1\text{H NMR}$  (400 MHz, Chloroform-*d*)  $\delta$  7.96 (d,  $J = 7.9$  Hz, 2H), 7.36 – 7.29 (m, 4H), 7.20 (t,  $J = 7.4$  Hz, 1H), 6.99 (d,  $J = 7.9$  Hz, 2H), 4.63 (dd,  $J = 8.6, 5.7$  Hz, 1H), 2.44 (s, 3H), 2.07 (td,  $J = 8.3, 4.2$  Hz, 1H), 1.96 – 1.87 (m, 2H), 1.82 – 1.60 (m, 5H), 1.45 – 1.38 (m, 1H), 1.22 – 1.14 (m, 2H), 1.05 – 0.97 (m, 2H).  $^{13}\text{C NMR}$  (101 MHz, Chloroform-*d*)  $\delta$  218.4, 194.1, 144.9, 144.9, 129.6, 128.7, 52.6, 52.3, 52.1, 44.9, 44.8,



38.5, 35.3, 35.3, 34.61, 34.58, 29.5, 29.5, 21.7. HRMS  $m/z$  (ESI): calcd for  $C_{23}H_{27}O_3$  ( $M + H$ )<sup>+</sup> 351.1955, found 351.1956.

### Allyl 2-(cyclohexylmethyl)-3-oxo-3-(p-tolyl)propanoate (32)

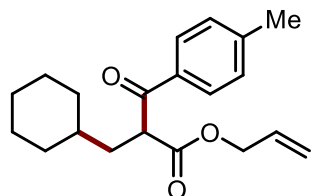

This compound was prepared according to General procedure, 41.4 mg, 44 % yield as colorless oil. <sup>1</sup>H NMR (400 MHz, Chloroform-*d*)  $\delta$  7.89 (d,  $J = 8.2$  Hz, 2H), 7.27 (d,  $J = 8.4$  Hz, 2H), 5.88 – 5.75 (m, 1H), 5.27 – 5.14 (m, 2H), 4.59 (dt,  $J = 5.6, 1.5$  Hz, 2H), 4.45 (dd,  $J = 8.0, 6.4$  Hz, 1H), 2.42 (s, 3H), 1.94 – 1.58 (m, 9H), 1.14 (dt,  $J = 15.6, 5.9$  Hz, 2H), 0.95 – 0.91 (m, 2H). <sup>13</sup>C NMR (101 MHz, Chloroform-*d*)  $\delta$  194.93, 170.1, 144.4, 133.6, 131.7, 129.5, 128.8, 118.4, 65.8, 51.6, 36.5, 35.8, 33.3, 33.0, 26.4, 26.1, 26.1, 21.7. HRMS  $m/z$  (ESI): calcd for  $C_{20}H_{27}O_3$  ( $M + H$ )<sup>+</sup> 315.1955, found 315.1957.

### 2-Chloroethyl 2-(cyclohexylmethyl)-3-oxo-3-(p-tolyl)propanoate (33)

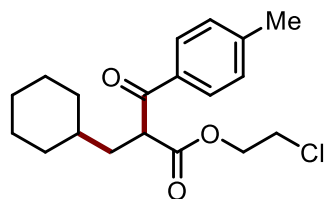

This compound was prepared according to General procedure, 46.4 mg, 46 % yield as colorless oil. <sup>1</sup>H NMR (400 MHz, Chloroform-*d*)  $\delta$  7.89 (d,  $J = 8.2$  Hz, 2H), 7.28 (d,  $J = 9.5$  Hz, 2H), 4.47 (dd,  $J = 8.4, 6.0$  Hz, 1H), 4.35 (t,  $J = 5.7$  Hz, 2H), 3.61 (td,  $J = 5.7, 3.1$  Hz, 2H), 2.42 (s, 3H), 1.96 – 1.92 (m, 1H), 1.88 – 1.79 (m, 2H), 1.75 – 1.62 (m, 4H), 1.31 – 1.14 (m, 4H), 0.98 – 0.88 (m, 2H). <sup>13</sup>C NMR (101 MHz, Chloroform-*d*)  $\delta$  194.7, 170.0, 144.5, 133.4, 129.5, 128.7, 64.5, 51.4, 41.2, 36.4, 35.8, 33.3, 32.8, 26.3, 26.1, 26.0, 21.7. HRMS  $m/z$  (ESI): calcd for  $C_{19}H_{26}O_3Cl$  ( $M + H$ )<sup>+</sup> 337.1565, found 337.1565.

### 2,2,2-trifluoroethyl 2-(cyclohexylmethyl)-3-oxo-3-(p-tolyl)propanoate (34)

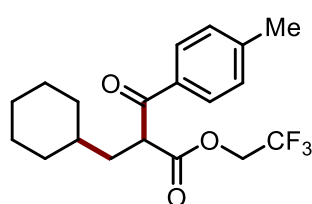

This compound was prepared according to General procedure, 72.6 mg, 68 % yield as colorless oil. <sup>1</sup>H NMR (400 MHz, Chloroform-*d*)  $\delta$  7.86 (d,  $J = 8.3$  Hz, 2H), 7.29

(d,  $J = 8.0$  Hz, 2H), 4.58 – 4.38 (m, 3H), 2.43 (s, 3H), 1.97 – 1.94 (m, 1H), 1.87 – 1.80 (m, 2H), 1.73 – 1.61 (m, 4H), 1.33 – 1.13 (m, 4H), 0.96 – 0.91 (m, 2H).  $^{13}\text{C}$  NMR (101 MHz, Chloroform-*d*)  $\delta$  194.1, 168.9, 144.8, 133.1, 129.6, 128.8, 124.1, 121.4, 60.7 (q,  $J = 36.9$  Hz), 51.2, 36.4, 35.88, 33.4, 32.8, 26.3, 26.1 (d,  $J = 4.6$  Hz), 21.7. HRMS  $m/z$  (ESI): calcd for  $\text{C}_{19}\text{H}_{24}\text{O}_3\text{F}_3$  ( $\text{M} + \text{H}$ ) $^+$  357.1672, found 357.1680.

### 2-methoxyethyl 2-(cyclohexylmethyl)-3-oxo-3-(*p*-tolyl)propanoate (35)

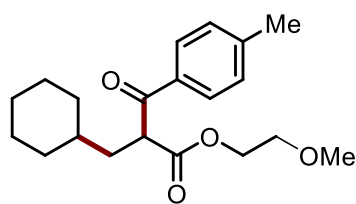

This compound was prepared according to General procedure, 57.7 mg, 58 % yield as colorless oil.  $^1\text{H}$  NMR (400 MHz, Chloroform-*d*)  $\delta$  7.95 – 7.84 (m, 2H), 7.28 – 7.26 (m, 2H), 4.50 – 4.40 (m, 1H), 4.32 – 4.19 (m, 2H), 3.53 – 3.50 (m, 2H), 3.29 (d,  $J = 1.9$  Hz, 3H), 2.42 (d,  $J = 1.9$  Hz, 3H), 1.95 – 1.63 (m, 7H), 1.31 – 1.11 (m, 4H), 0.99 – 0.84 (m, 2H).  $^{13}\text{C}$  NMR (101 MHz, Chloroform-*d*)  $\delta$  194.9, 170.4, 144.4, 133.6, 129.4, 128.8, 70.3, 64.2, 58.9, 51.6, 36.4, 35.9, 33.4, 33.0, 26.4, 26.1, 26.1, 21.7. HRMS  $m/z$  (ESI): calcd for  $\text{C}_{20}\text{H}_{29}\text{O}_4$  ( $\text{M} + \text{H}$ ) $^+$  333.2060, found 333.2062.

### Diethyl (3-cyclohexyl-1-oxo-1-(*p*-tolyl)propan-2-yl)phosphonate (36)

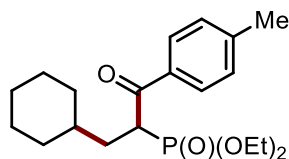

This compound was prepared according to General procedure, 50.5 mg, 46 % yield as colorless oil.  $^1\text{H}$  NMR (400 MHz, Chloroform-*d*)  $\delta$  7.93 (d,  $J = 8.3$  Hz, 2H), 7.29 (d,  $J = 6.6$  Hz, 2H), 4.25 – 4.00 (m, 5H), 2.44 (s, 3H), 1.86 – 1.64 (m, 8H), 1.28 (d,  $J = 3.2$  Hz, 3H), 1.20 (d,  $J = 7.1$  Hz, 3H), 1.11 (t,  $J = 10.7$ , 3H), 0.92 – 0.86 (m, 2H).  $^{13}\text{C}$  NMR (101 MHz, Chloroform-*d*)  $\delta$  199.6, 195.6, 144.1, 135.2, 129.2, 128.8, 62.7, 62.5, 45.2, 43.9, 36.4, 36.2, 33.7, 32.5, 26.3, 26.1, 26.0, 21.6, 16.4. HRMS  $m/z$  (ESI): calcd for  $\text{C}_{20}\text{H}_{32}\text{O}_4\text{P}$  ( $\text{M} + \text{H}$ ) $^+$  367.2033, found 367.2036.

**(1S,2R,5S)-2-isopropyl-5-methylcyclohexyl 2-(cyclohexylmethyl)-3-oxo-3-(p-tolyl)propanoate (37)**

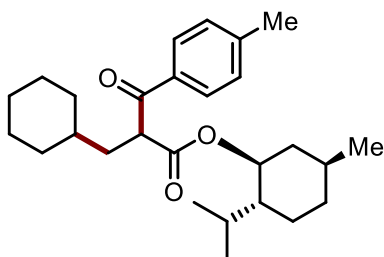

This compound was prepared according to General procedure, 66.7 mg, 54 % yield as a colorless oil. <sup>1</sup>H NMR (400 MHz, Chloroform-*d*) δ 7.88 (dd, *J* = 8.2, 3.7 Hz, 2H), 7.25 (d, *J* = 7.8 Hz, 2H), 4.66 – 4.60 (m, 1H), 4.37 – 4.33 (m, 1H), 2.41 (s, 3H), 1.97 – 1.82 (m, 4H), 1.74 – 1.63 (m, 5H), 1.45 – 1.09 (m, 7H), 1.03 – 0.72 (m, 12H), 0.63 – 0.54 (m, 3H). <sup>13</sup>C NMR (101 MHz, Chloroform-*d*) δ 133.9, 129.3, 128.7, 128.7, 75.3, 75.2, 52.5, 52.3, 46.8, 46.8, 40.4, 40.3, 36.2, 36.1, 35.8, 35.7, 34.2, 33.5, 32.93, 32.90, 31.3, 26.4, 26.2, 26.1, 26.1, 25.8, 25.7, 23.0, 22.9, 22.0, 21.7, 20.8, 20.7, 15.8, 15.7. HRMS *m/z* (ESI): calcd for C<sub>27</sub>H<sub>41</sub>O<sub>3</sub> (M + H)<sup>+</sup> 413.3050, found 413.3055.

**Methyl 3-oxo-3-(p-tolyl)-2-((triphenylsilyl)methyl)propanoate (38)**

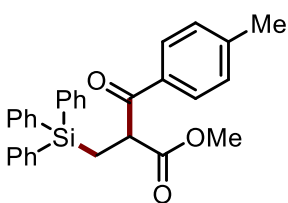

This compound was prepared according to General procedure, 94.6 mg, 68 % yield as a colorless oil. <sup>1</sup>H NMR (400 MHz, Chloroform-*d*) δ 7.64 – 7.52 (m, 8H), 7.39– 7.31 (m, 9H), 7.13 (d, *J* = 7.9 Hz, 2H), 4.48– 4.44 (m, 1H), 3.32 (s, 3H), 2.37 (s, 3H), 2.25 – 2.19 (m, 1H), 2.09 – 2.03 (m, 1H). <sup>13</sup>C NMR (101 MHz, Chloroform-*d*) δ 195.0, 170.8, 144.2, 135.8, 133.8, 133.1, 129.7, 129.2, 128.8, 128.0, 52.3, 49.4, 21.7, 12.9. HRMS *m/z* (ESI): calcd for C<sub>30</sub>H<sub>29</sub>O<sub>3</sub>Si (M + H)<sup>+</sup> 465.1880, found 465.1882.

**Methyl 3-oxo-3-(m-tolyl)-2-((triphenylsilyl)methyl)propanoate (39)**

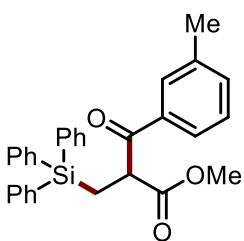

This compound was prepared according to General procedure, 98.7 mg, 71 % yield as a colorless oil. <sup>1</sup>H NMR (400 MHz, Chloroform-*d*) δ 7.66 – 7.48 (m, 8H), 7.47 – 7.32 (m, 10H), 7.26 – 7.24 (m, 1H), 4.51 (dd, *J* = 8.5, 5.8 Hz, 1H), 3.38 (s, 3H), 2.35 (s, 3H), 2.25 (dd, *J* = 15.2, 8.5 Hz, 1H), 2.11 (dd, *J* = 15.2, 5.8 Hz, 1H). <sup>13</sup>C NMR (101 MHz, Chloroform-*d*) δ 195.8, 170.8, 135.8, 135.6, 134.1, 133.7, 129.7, 129.2, 128.4,

128.0, 125.9, 52.3, 49.5, 21.3, 12.9. HRMS  $m/z$  (ESI): calcd for  $C_{30}H_{29}O_3Si$  ( $M + H$ )<sup>+</sup> 465.1880, found 465.1884.

### Methyl 3-(4-fluorophenyl)-3-oxo-2-((triphenylsilyl)methyl)propanoate (40)

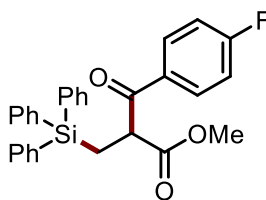

This compound was prepared according to General procedure, 91.2 mg, 65 % yield as a colorless oil. <sup>1</sup>H NMR (400 MHz, Chloroform-*d*)  $\delta$  7.74 – 7.65 (m, 2H), 7.55 – 7.53 (m, 6H), 7.41 – 7.31 (m, 9H), 7.01 – 6.97 (m, 2H), 4.45 – 4.42 (m, 1H), 3.37 (s, 3H), 2.26 – 2.07 (m, 2H). <sup>13</sup>C NMR (101 MHz, Chloroform-*d*)  $\delta$  193.8, 170.7, 165.8 (d,  $J = 255.5$  Hz), 135.8, 133.7, 132.1 (d,  $J = 3.2$  Hz), 131.3 (d,  $J = 9.3$  Hz), 129.8, 128.0, 115.6 (d,  $J = 21.9$  Hz), 52.4, 49.5, 12.8. <sup>19</sup>F NMR (376 MHz, Chloroform-*d*)  $\delta$  -104.7. HRMS  $m/z$  (ESI): calcd for  $C_{29}H_{26}FO_3Si$  ( $M + H$ )<sup>+</sup> 469.1630, found 469.1631.

### Methyl 3-(4-chlorophenyl)-3-oxo-2-((triphenylsilyl)methyl)propanoate (41)

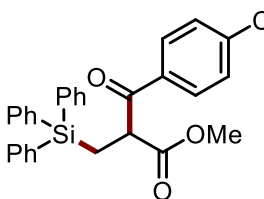

This compound was prepared according to General procedure, 90.2 mg, 62 % yield as a colorless oil. <sup>1</sup>H NMR (400 MHz, Chloroform-*d*)  $\delta$  7.62 – 7.49 (m, 8H), 7.41 – 7.28 (m, 11H), 4.42 (dd,  $J = 7.7, 6.5$  Hz, 1H), 3.38 (s, 3H), 2.25 – 2.08 (m, 2H). <sup>13</sup>C NMR (101 MHz, Chloroform-*d*)  $\delta$  194.2, 170.6, 139.8, 135.8, 134.0, 133.6, 130.0, 129.8, 128.8, 128.0, 52.4, 49.5, 12.7. HRMS  $m/z$  (ESI): calcd for  $C_{29}H_{26}ClO_3Si$  ( $M + H$ )<sup>+</sup> 485.1334, found 485.1337.

### Isobutyl 3-oxo-3-(*p*-tolyl)-2-((triphenylsilyl)methyl)propanoate (42)

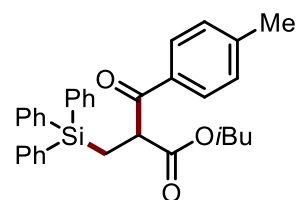

This compound was prepared according to General procedure, 76.1 mg, 69 % yield as a colorless oil. <sup>1</sup>H NMR (400 MHz, Chloroform-*d*)  $\delta$  7.75 – 7.53 (m, 8H), 7.50 – 7.29 (m, 9H), 7.16 (d,  $J = 8.0$  Hz, 2H), 4.49 (dd,  $J = 8.0, 6.1$  Hz, 1H), 3.55 (ddd,  $J = 39.2, 10.6, 6.7$  Hz, 2H), 2.40 (s, 3H), 2.30 – 2.11 (m, 2H), 1.70 (dt,  $J = 13.4, 6.7$  Hz, 1H), 0.76 (dd,  $J = 6.7, 1.8$  Hz, 6H). <sup>13</sup>C NMR (101 MHz, Chloroform-*d*)  $\delta$

195.0, 170.6, 144.0, 135.9, 133.9, 133.3, 129.7, 129.1, 128.8, 127.9, 71.4, 49.5, 27.4, 21.7, 18.9, 12.5. HRMS  $m/z$  (ESI): calcd for  $C_{33}H_{35}O_3Si$  ( $M + H$ )<sup>+</sup> 507.2350, found 507.2361.

#### Cyclohexyl 3-oxo-3-(p-tolyl)-2-((triphenylsilyl)methyl)propanoate (43)

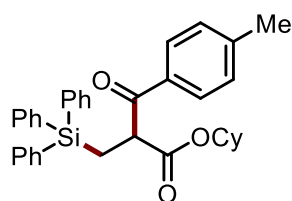

This compound was prepared according to General procedure, 104.9 mg, 67 % yield as a colorless oil. <sup>1</sup>H NMR (400 MHz, Chloroform-*d*)  $\delta$  7.70 – 7.44 (m, 8H), 7.48 – 7.29 (m, 9H), 7.15 (d,  $J = 8.0$  Hz, 2H), 4.50 (dq,  $J = 8.8, 4.0$  Hz, 1H), 4.42 (dd,  $J = 7.7, 6.2$  Hz, 1H), 2.40 (s, 3H), 2.28 – 2.10 (m, 2H), 1.59 – 1.09 (m, 11H). <sup>13</sup>C NMR (101 MHz, Chloroform-*d*)  $\delta$  170.0, 135.9, 134.0, 129.6, 129.0, 128.8, 127.9, 73.6, 49.9, 30.92, 30.89, 25.3, 23.3, 21.7, 12.3. HRMS  $m/z$  (ESI): calcd for  $C_{36}H_{33}O_3Si$  ( $M + H$ )<sup>+</sup> 533.2506, found 533.2515.

#### Benzyl 3-oxo-3-(p-tolyl)-2-((triphenylsilyl)methyl)propanoate (44)

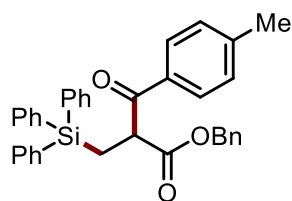

This compound was prepared according to General procedure, 76.1 mg, 47 % yield as a colorless oil. <sup>1</sup>H NMR (400 MHz, Chloroform-*d*)  $\delta$  7.62 – 7.50 (m, 8H), 7.41 – 7.28 (m, 11H), 4.42 (dd,  $J = 7.7, 6.5$  Hz, 1H), 3.38 (s, 3H), 2.23 – 2.07 (m, 2H). <sup>13</sup>C NMR (101 MHz, Chloroform-*d*)  $\delta$  194.9, 170.3, 144.1, 135.9, 133.8, 129.7, 129.1, 128.8, 128.4, 128.1, 128.0, 127.95, 66.9, 49.6, 21.6, 12.6. HRMS  $m/z$  (ESI): calcd for  $C_{36}H_{33}O_3Si$  ( $M + H$ )<sup>+</sup> 541.2193, found 541.2208.

#### 3-oxo-3-(p-tolyl)-2-((triphenylsilyl)methyl)propanoate (45)

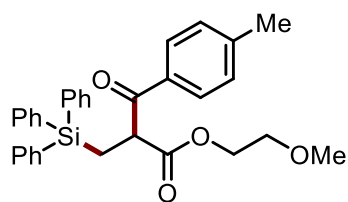

This compound was prepared according to General procedure, 79.2 mg, 52 % yield as a colorless oil. <sup>1</sup>H NMR (400 MHz, Chloroform-*d*)  $\delta$  7.61 – 7.52 (m, 8H), 7.39 – 7.32 (m, 9H), 7.12 (d,  $J = 8.0$  Hz, 2H), 4.48 – 4.45 (m, 1H), 3.96 – 3.81 (m, 2H), 3.35 – 3.27 (m, 2H), 3.21 (s, 3H), 2.36 (s, 3H), 2.21 (dd,

$J = 15.2, 8.6$  Hz, 1H), 2.08 (dd,  $J = 15.2, 5.6$  Hz, 1H).  $^{13}\text{C}$  NMR (101 MHz, Chloroform-*d*)  $\delta$  194.9, 170.5, 144.1, 135.9, 133.8, 133.1, 129.7, 129.1, 128.9, 128.0, 70.0, 64.1, 58.8, 49.5, 21.6, 12.7. HRMS  $m/z$  (ESI): calcd for  $\text{C}_{32}\text{H}_{33}\text{O}_4\text{Si}$  ( $\text{M} + \text{H}$ )<sup>+</sup> 509.2143, found 509.2150.

### Methyl 2-((methyldiphenylsilyl)methyl)-3-oxo-3-(*p*-tolyl)propanoate (46)

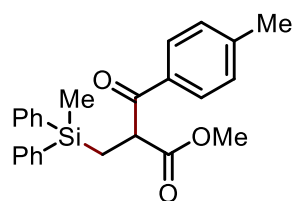

This compound was prepared according to General procedure, 86.8 mg, 72 % yield as a colorless oil.  $^1\text{H}$  NMR (400 MHz, Chloroform-*d*)  $\delta$  7.67 – 7.61 (m, 2H), 7.53 – 7.49 (m, 4H), 7.39 – 7.31 (m, 6H), 7.16 (d,  $J = 8.0$  Hz, 2H), 4.31 (dd,  $J = 8.5, 6.0$  Hz, 1H), 3.49 (s, 3H), 2.38 (s, 3H), 1.89 (dd,  $J = 15.0, 8.6$  Hz, 1H), 1.73 (dd,  $J = 15.0, 6.0$  Hz, 1H), 0.55 (s, 3H).  $^{13}\text{C}$  NMR (101 MHz, Chloroform-*d*)  $\delta$  195.3, 171.2, 144.3, 135.9, 135.7, 134.6, 133.1, 129.5, 129.49, 129.3, 128.8, 128.0, 127.9, 52.4, 49.3, 21.6, 14.1, -4.1. HRMS  $m/z$  (ESI): calcd for  $\text{C}_{25}\text{H}_{27}\text{O}_3\text{Si}$  ( $\text{M} + \text{H}$ )<sup>+</sup> 403.1724, found 403.1728.

## 5. Mechanistic Investigations

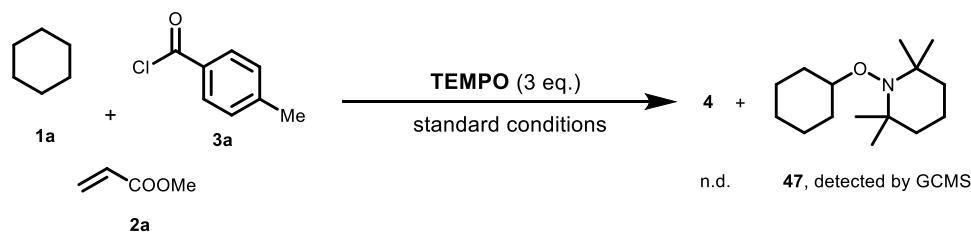

A dry 10 mL vial equipped with a Teflon-coated magnetic stir bar was charged with acyl chlorides (0.30 mmol, 1.0 equiv.), alkanes (3.0 mmol, 10 equiv.), alkenes (0.90 mmol, 3.0 equiv.), and 2,2,6,6-Tetramethylpiperidinoxy (0.9 mmol, 3.0 equiv.), LiCl (37.8 mg, 3.0 equiv.) and  $\text{FeCl}_3 \cdot 6\text{H}_2\text{O}$  (8.1 mg, 10 mol%) were dissolved in acetone (1.0 mL). Afterward, a pre-catalyst solution (it was prepared by a mix of  $\text{NiBr}_2 \cdot \text{DME}$  (6.6 mg, 10 mol%), 4,4'-di-*tert*-butyl-2,2'-bipyridine (8.1 mg, 10 mol%) in anhydrous MeCN (2.0 mL) under  $\text{N}_2$  atmosphere, and was stirred for 10 minutes.) was added via

syringe. Then, it was capped with a Teflon lid equipped with Graphite Felt (20×10×15 mm) as the anode and reticulated vitreous carbon (20×10×1 mm) as the cathode. The reaction mixture was stirred under N<sub>2</sub> and electrolyzed at a constant current of 4 mA under irradiation by a 10-W 390-nm LED lamp with a cooling fan. After being stirred at 10 °C for 24 h, the reaction mixture was analyzed by GCMS.

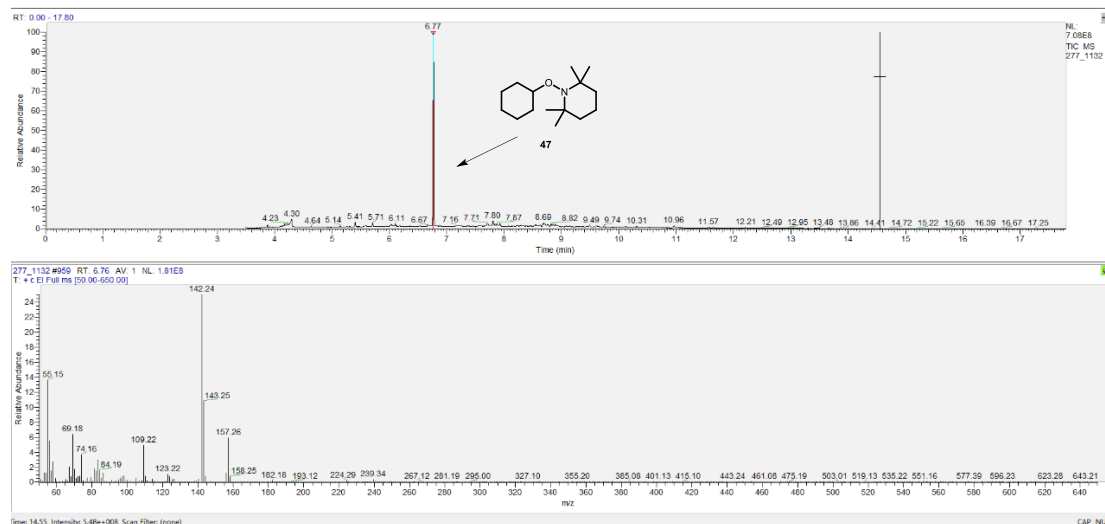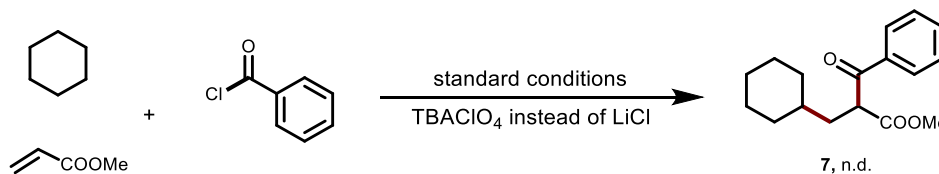

A dry 10 mL vial equipped with a Teflon-coated magnetic stir bar was charged with benzoyl chloride (0.30 mmol, 1.0 equiv.), cyclohexane (3.0 mmol, 10 equiv.), methyl acrylate (0.90 mmol, 3.0 equiv.), TBAClO<sub>4</sub> (846.9 mg, 3.0 equiv.) and FeCl<sub>3</sub>·6H<sub>2</sub>O (8.1 mg, 10 mol%) were dissolved in acetone (1.0 mL). Afterward, a pre-catalyst solution (it was prepared by a mix of NiBr<sub>2</sub>·DME (6.6 mg, 10 mol%), 4,4'-di-tert-butyl-2,2'-bipyridine (8.1 mg, 10 mol%) in anhydrous MeCN (2.0 mL) under N<sub>2</sub> atmosphere, and was stirred for 10 minutes.) was added via syringe. Then, it was capped with a Teflon lid equipped with Graphite Felt (20×10×15 mm) as the anode and reticulated vitreous carbon (20×10×1 mm) as the cathode. The reaction mixture was stirred under N<sub>2</sub> and electrolyzed at a constant current of 4 mA under irradiation by a 10-W 390-nm LED lamp for 24 h. After the reaction is completed, the reaction mixture was analyzed by GCMS. We have no found the corresponding compound **7**.

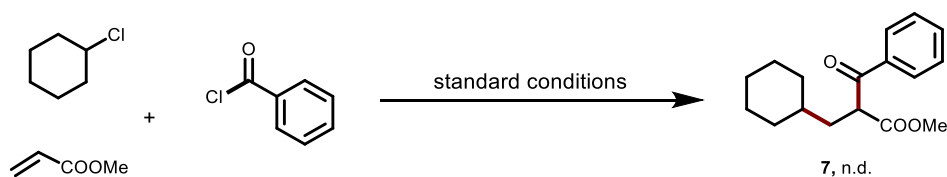

A dry 10 mL vial equipped with a Teflon-coated magnetic stir bar was charged with benzoyl chloride (0.30 mmol, 1.0 equiv.), chlorocyclohexane (3.0 mmol, 10 equiv.), methyl acrylate (0.90 mmol, 3.0 equiv.), LiCl (37.8 mg, 3.0 equiv.) and FeCl<sub>3</sub>·6H<sub>2</sub>O (8.1 mg, 10 mol%) were dissolved in acetone (1.0 mL). Afterward, a pre-catalyst solution (it was prepared by a mix of NiBr<sub>2</sub>·DME (6.6 mg, 10 mol%), 4,4'-di-tert-butyl-2,2'-bipyridine (8.1 mg, 10 mol%) in anhydrous MeCN (2.0 mL) under N<sub>2</sub> atmosphere, and was stirred for 10 minutes.) was added via syringe. Then, it was capped with a Teflon lid equipped with Graphite Felt (20×10×15 mm) as the anode and reticulated vitreous carbon (20×10×1 mm) as the cathode. The reaction mixture was stirred under N<sub>2</sub> and electrolyzed at a constant current of 4 mA under irradiation by a 10-W 390-nm LED lamp for 24 h. After the reaction is completed, the reaction mixture was analyzed by GCMS. We have no found the corresponding compound **7**.

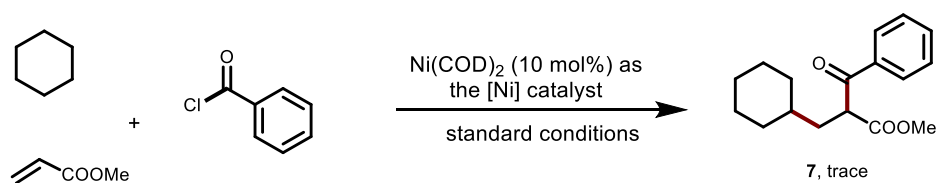

A dry 10 mL vial equipped with a Teflon-coated magnetic stir bar was charged with benzoyl chloride (0.30 mmol, 1.0 equiv.), cyclohexane (3.0 mmol, 10 equiv.), methyl acrylate (0.90 mmol, 3.0 equiv.), LiCl (37.8 mg, 3.0 equiv.) and FeCl<sub>3</sub>·6H<sub>2</sub>O (8.1 mg, 10 mol%) were dissolved in acetone (1.0 mL). Afterward, Ni(COD)<sub>2</sub> (0.03 mmol, 10 mol%) in anhydrous MeCN (2.0 mL) under N<sub>2</sub> atmosphere, and was stirred for 10 minutes.) was added via syringe. Then, it was capped with a Teflon lid equipped with Graphite Felt (20×10×15 mm) as the anode and reticulated vitreous carbon (20×10×1 mm) as the cathode. The reaction mixture was stirred under N<sub>2</sub> and electrolyzed at a constant current of 4 mA with a cooling fan to keep the reaction temperature at 10 °C under irradiation by a 10-W 390-nm LED lamp for 24 h. After the reaction was



completed, the reaction mixture was analyzed by GCMS.

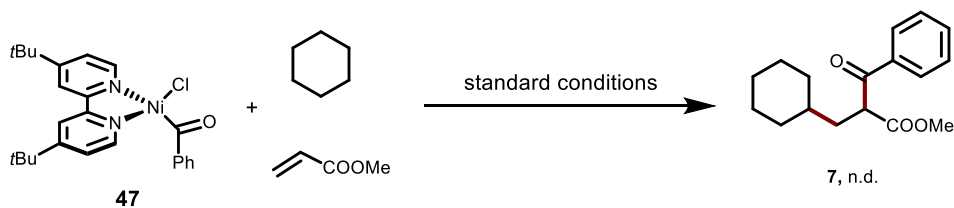

A dry 10 mL vial equipped with a Teflon-coated magnetic stir bar was charged with cyclohexane (3.0 mmol, 10 equiv.), methyl acrylate (0.90 mmol, 3.0 equiv.), LiCl (37.8 mg, 3.0 equiv.) and FeCl<sub>3</sub>·6H<sub>2</sub>O (8.1 mg, 10 mol%) were dissolved in acetone (1.0 mL). Afterward, complex **47** (0.3 mmol, 1.0 equiv.) in anhydrous MeCN (2.0 mL) under N<sub>2</sub> atmosphere, and was stirred for 10 minutes.) was added via syringe. Then, it was capped with a Teflon lid equipped with Graphite Felt (20×10×15 mm) as the anode and reticulated vitreous carbon (20×10×1 mm) as the cathode. The reaction mixture was stirred under N<sub>2</sub> and electrolyzed at a constant current of 4 mA under irradiation by a 10-W 390-nm LED lamp with a cooling fan to keep the reaction temperature at 10 °C for 24 h. After the reaction was completed, the reaction mixture was analyzed by GCMS.

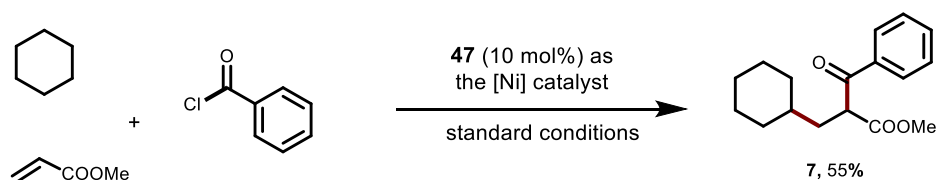

A dry 10 mL vial equipped with a Teflon-coated magnetic stir bar was charged with benzoyl chloride (0.30 mmol, 1.0 equiv.), cyclohexane (3.0 mmol, 10 equiv.), methyl acrylate (0.90 mmol, 3.0 equiv.), LiCl (37.8 mg, 3.0 equiv.) and FeCl<sub>3</sub>·6H<sub>2</sub>O (8.1 mg, 10 mol%) were dissolved in acetone (1.0 mL). Afterward, complex **47** (0.03 mmol, 10 mol%) in anhydrous MeCN (2.0 mL) under N<sub>2</sub> atmosphere, and was stirred for 10 minutes.) was added via syringe. Then, it was capped with a Teflon lid equipped with Graphite Felt (20×10×15 mm) as the anode and reticulated vitreous carbon (20×10×1 mm) as the cathode. The reaction mixture was stirred under N<sub>2</sub> and electrolyzed at a constant current of 4 mA with a cooling fan to keep the reaction temperature at 10 °C under irradiation by a 10-W 390-nm LED lamp for 24 h. After the reaction was

completed, the reaction mixture was analyzed by gas chromatography to obtain the yield of **7** using dodecane as an internal standard.

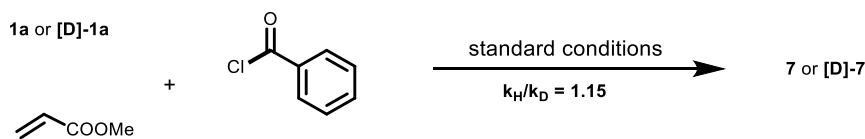

A dry 10 mL vial equipped with a Teflon-coated magnetic stir bar was charged with benzoyl chloride (0.30 mmol, 1.0 equiv.), **1a** or **[D]-1a** (3.0 mmol, 10 equiv.), methyl acrylate (0.90 mmol, 3.0 equiv.), LiCl (37.8 mg, 3.0 equiv.) and FeCl<sub>3</sub>·6H<sub>2</sub>O (8.1 mg, 10 mol%) were dissolved in acetone (1.0 mL). Afterward, a pre-catalyst solution (it was prepared by a mix of NiBr<sub>2</sub>·DME (6.6 mg, 10 mol%), 4,4'-di-tert-butyl-2,2'-bipyridine (8.1 mg, 10 mol%) in anhydrous MeCN (2.0 mL) under N<sub>2</sub> atmosphere, and was stirred for 10 minutes.) was added via syringe. Then, it was capped with a Teflon lid equipped with Graphite Felt (20×10×15 mm) as the anode and reticulated vitreous carbon (20×10×1 mm) as the cathode. The reaction mixture was stirred under N<sub>2</sub> and electrolyzed at a constant current of 4 mA with a cooling fan to keep the reaction temperature at 10 °C under irradiation by a 10-W 390-nm LED lamp for the indicated time (five parallel runs). After the reaction was completed, the reaction mixture was analyzed by gas chromatography to obtain the yield of **7** using dodecane as an internal standard. KIE value was measured averaging the slopes obtained for each run, and  $k_H/k_D = 1.15$  was obtained.

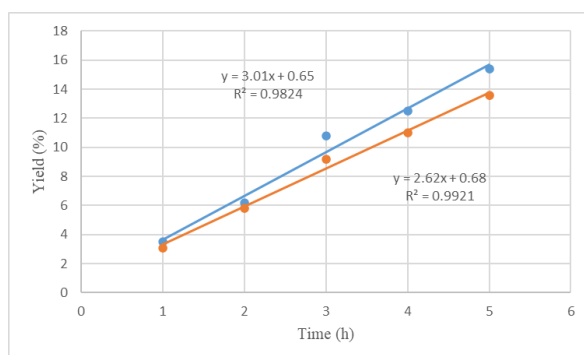

## 6. Cyclic Voltammetry (CV) Measurements

All measurements were performed under anhydrous conditions in argon-filled glovebox. All supporting electrolytes were dried under dynamic vacuum (less than 0.1 mbar) over 24 h at 100 °C and stored inside the glovebox. The cell for the analysis was equipped with a glass vial (working volume is 10 mL) and Teflon cap, equipped with O-ring for tight sealing. Glassy carbon was used as working electrodes (circle,  $d = 3$  mm), and an Ag/AgCl as the reference electrode. Each sample was calibrated against the Fc/Fc<sup>+</sup> reference. All measurements were conducted in 0.1 M solutions of nBu<sub>4</sub>NPF<sub>6</sub> in MeCN/acetone (2/1). All analyte concentration was 10 mM. The scan rate was typically 50 mV/s.

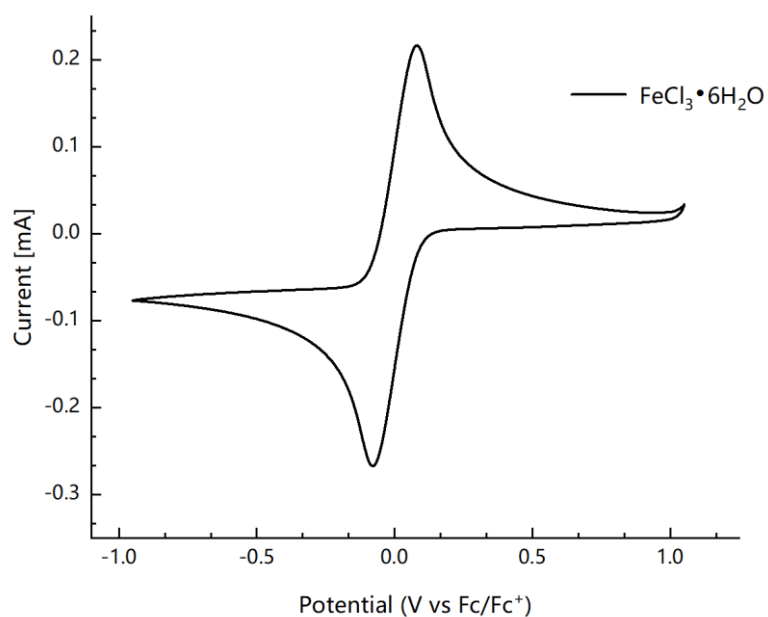

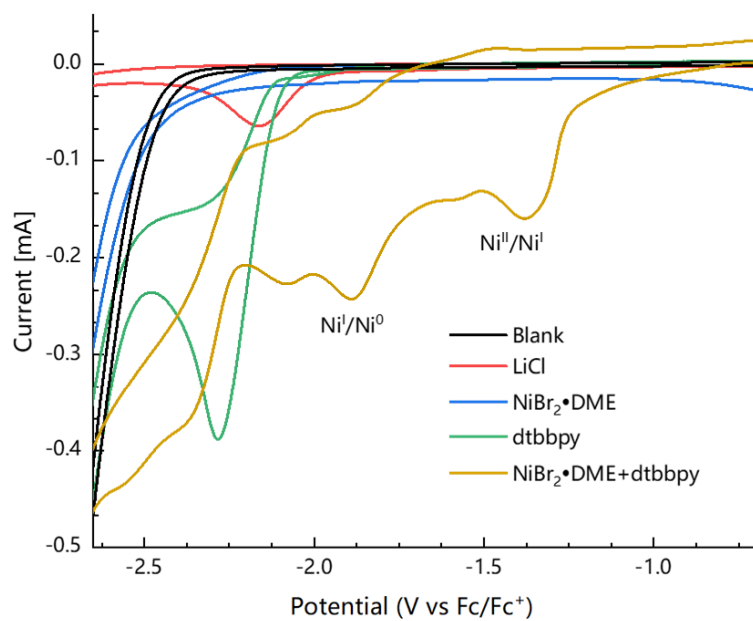

## 7. NMR Spectra

### Methyl 2-(cyclohexylmethyl)-3-oxo-3-(p-tolyl)propanoate (4)

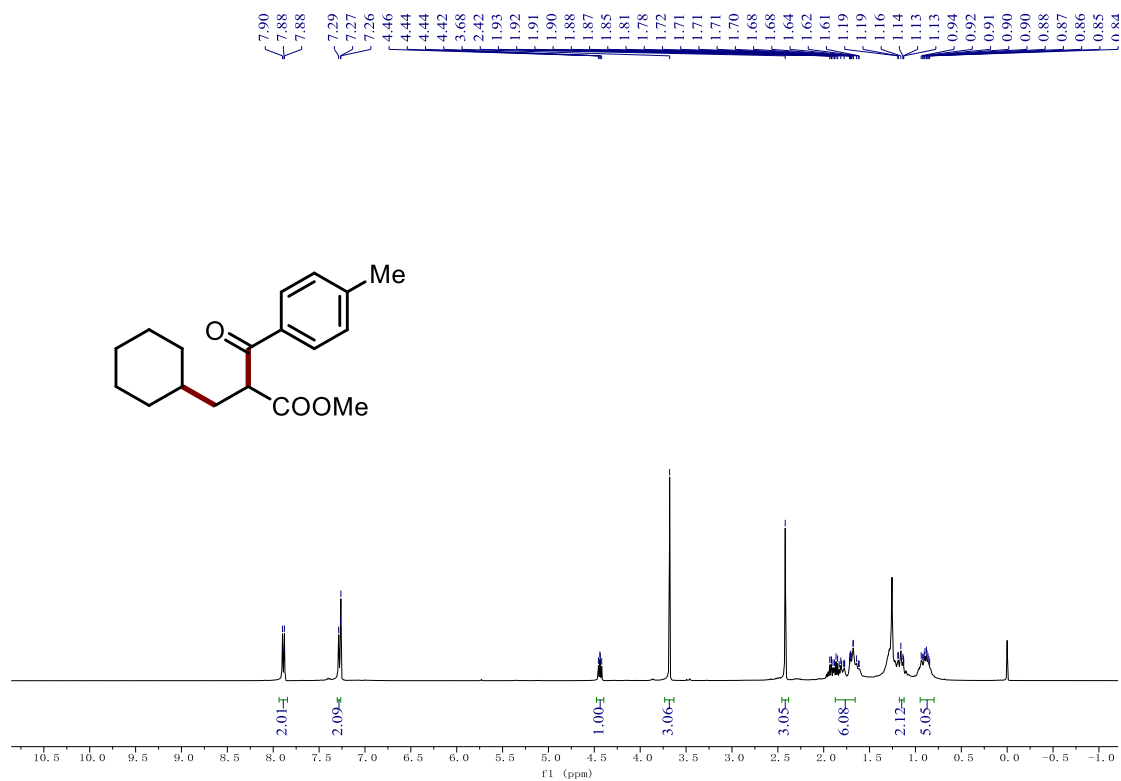

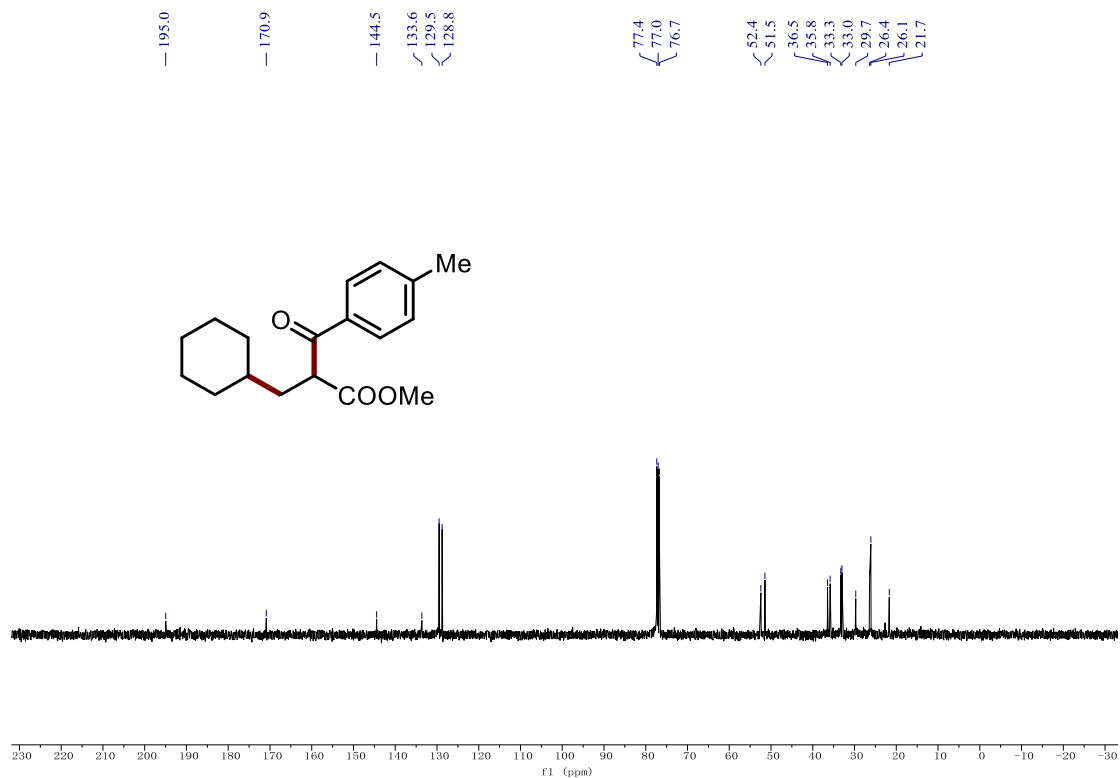

### Methyl 2-(cyclohexylmethyl)-3-oxo-3-(o-tolyl)propanoate (5)

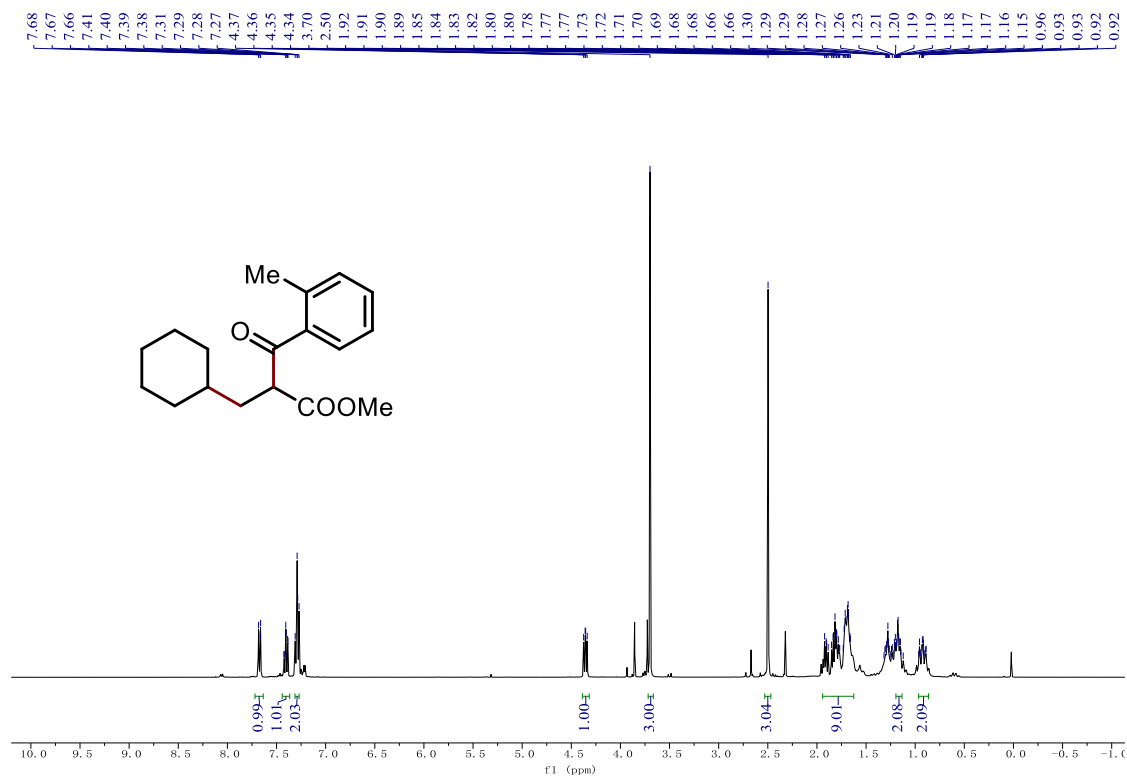

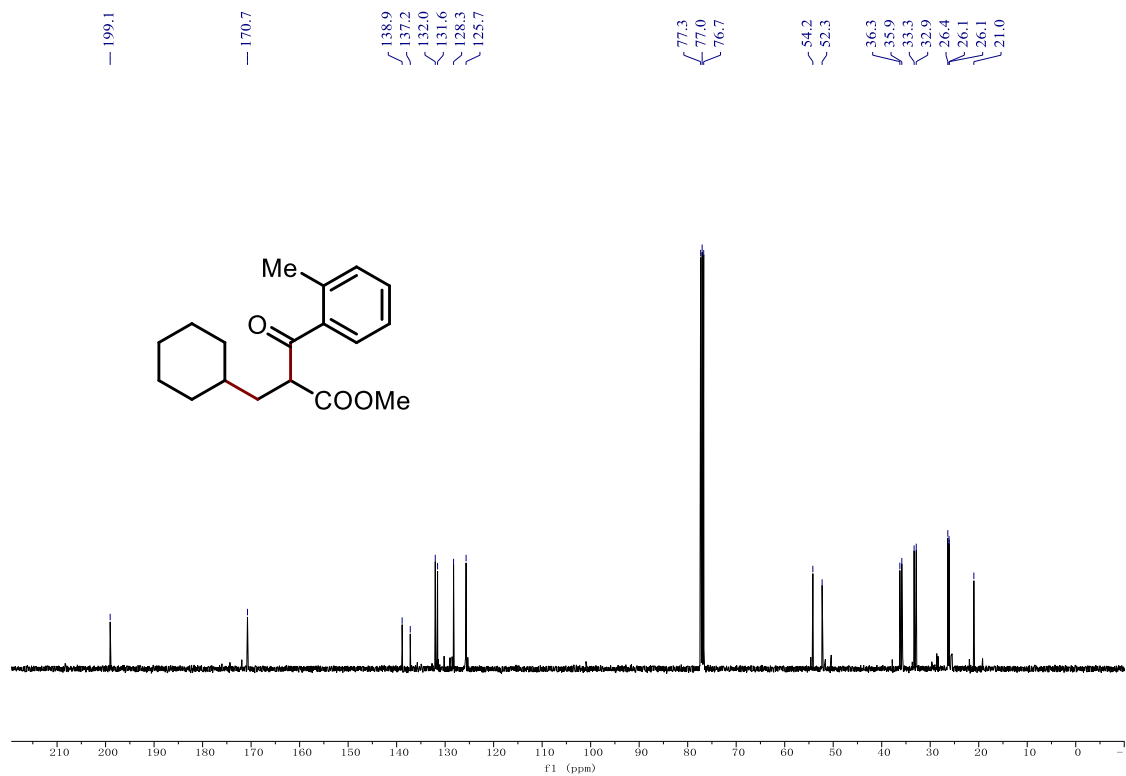

### Methyl -2-(cyclohexylmethyl)-3-oxo-3-(m-tolyl)propanoate (6)

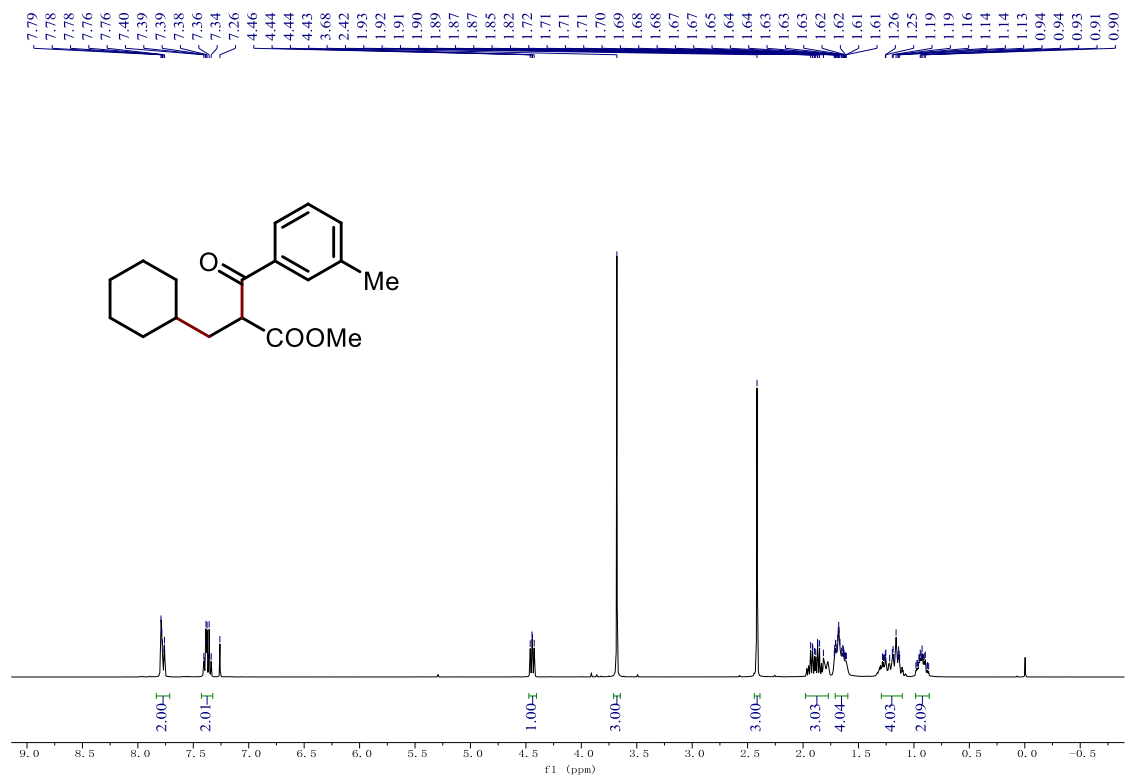

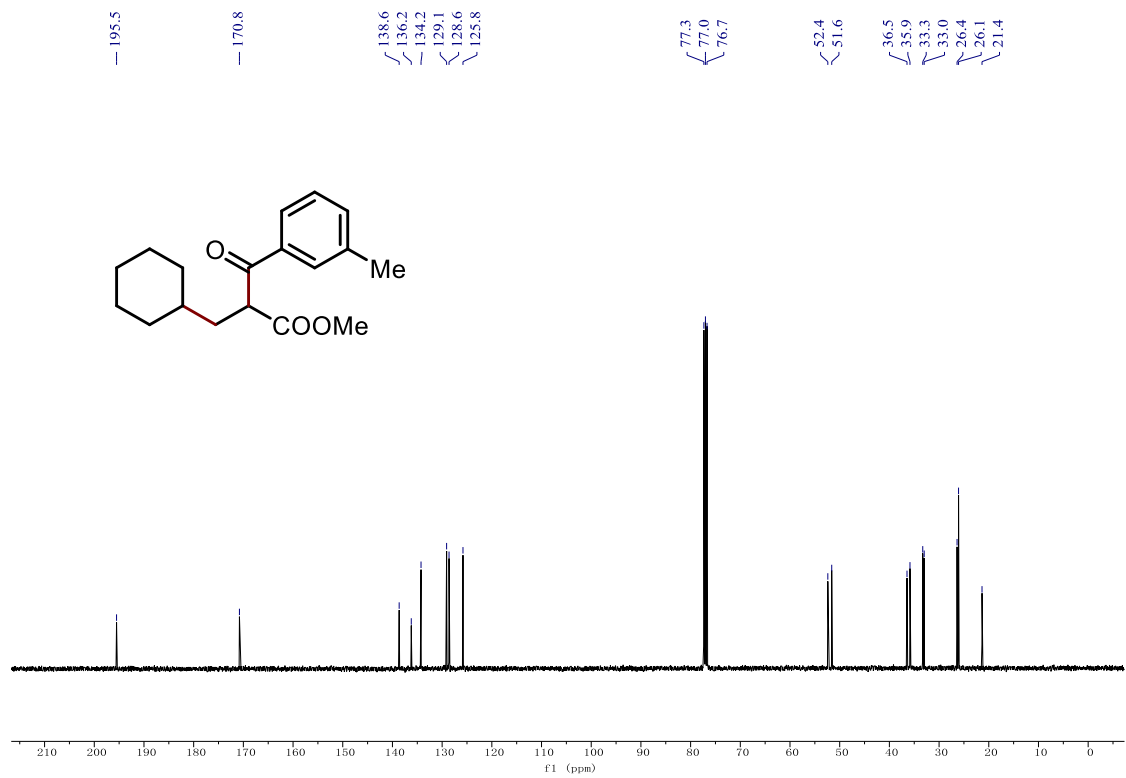

### Methyl 2-(cyclohexylmethyl)-3-oxo-3-phenylpropanoate (7)

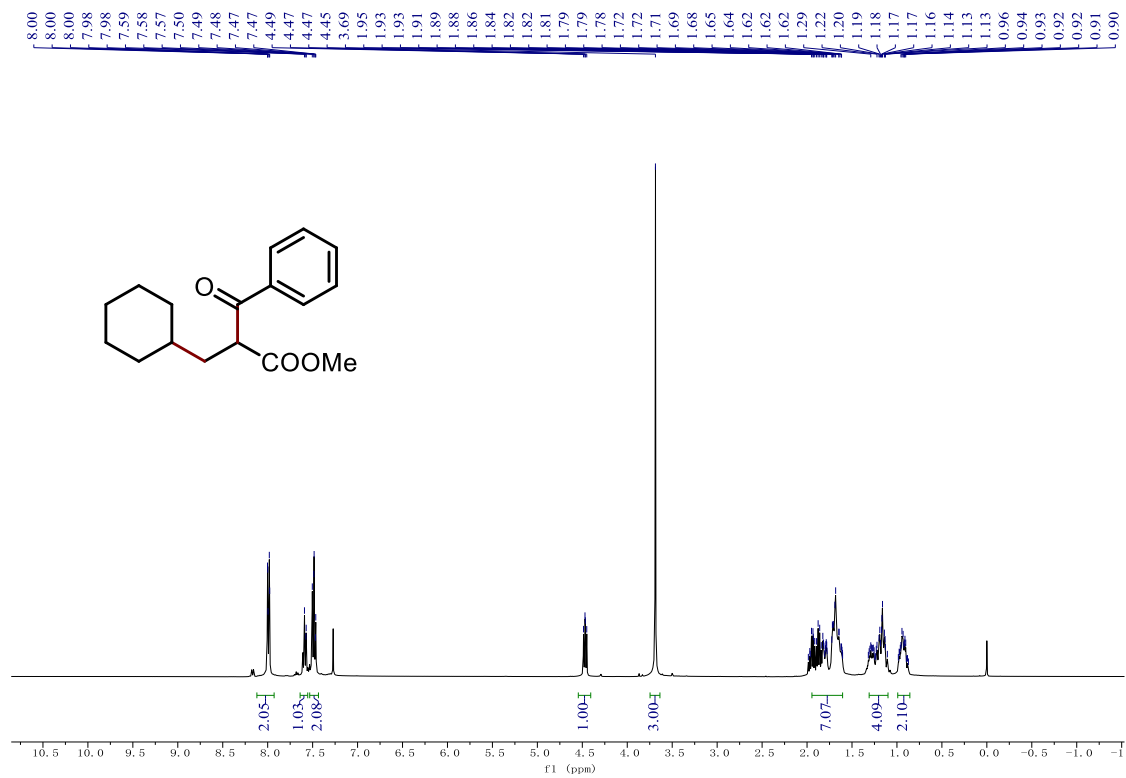

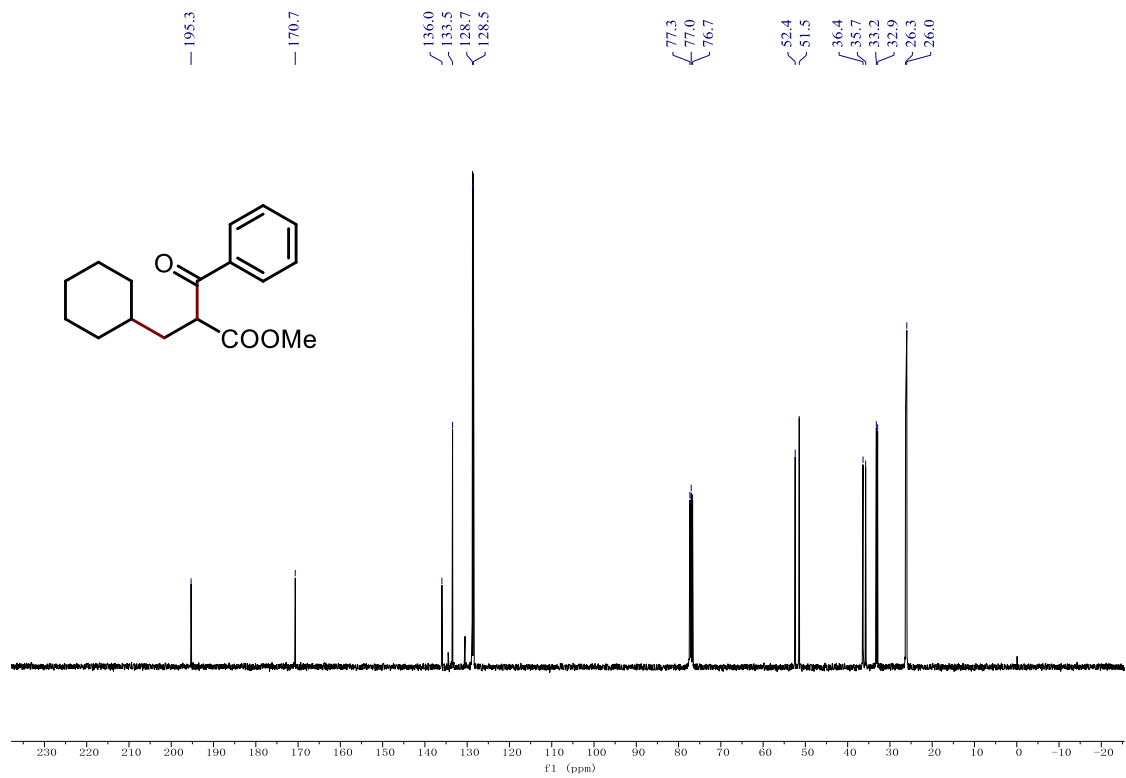

### Methyl 2-(cyclohexylmethyl)-3-(naphthalen-2-yl)-3-oxopropanoate (8)

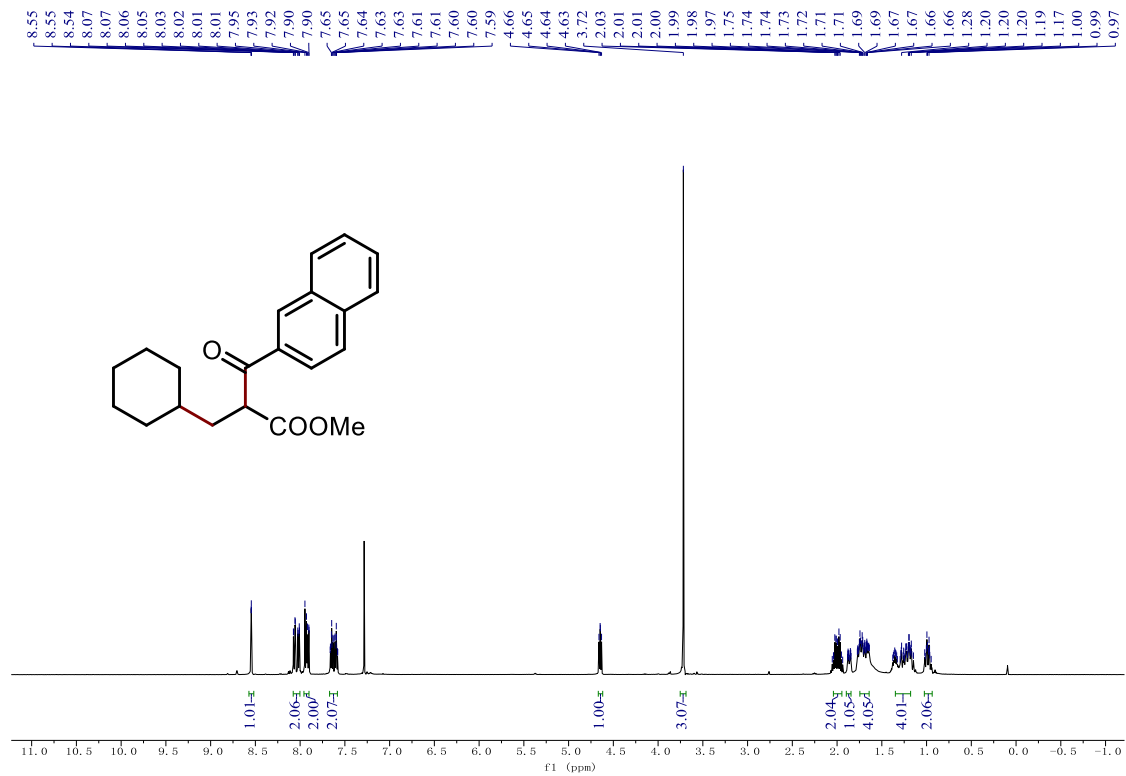



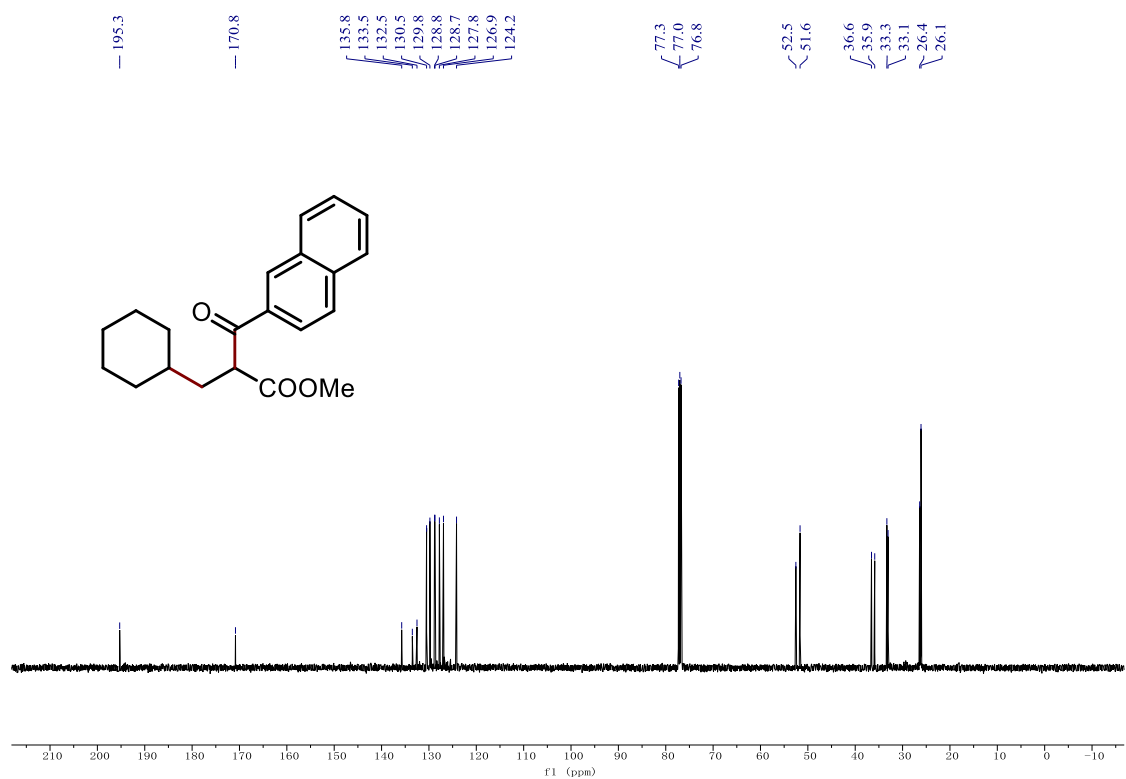

**Methyl 3-(4-(tert-butyl)phenyl)-2-(cyclohexylmethyl)-3-oxopropanoate (9)**

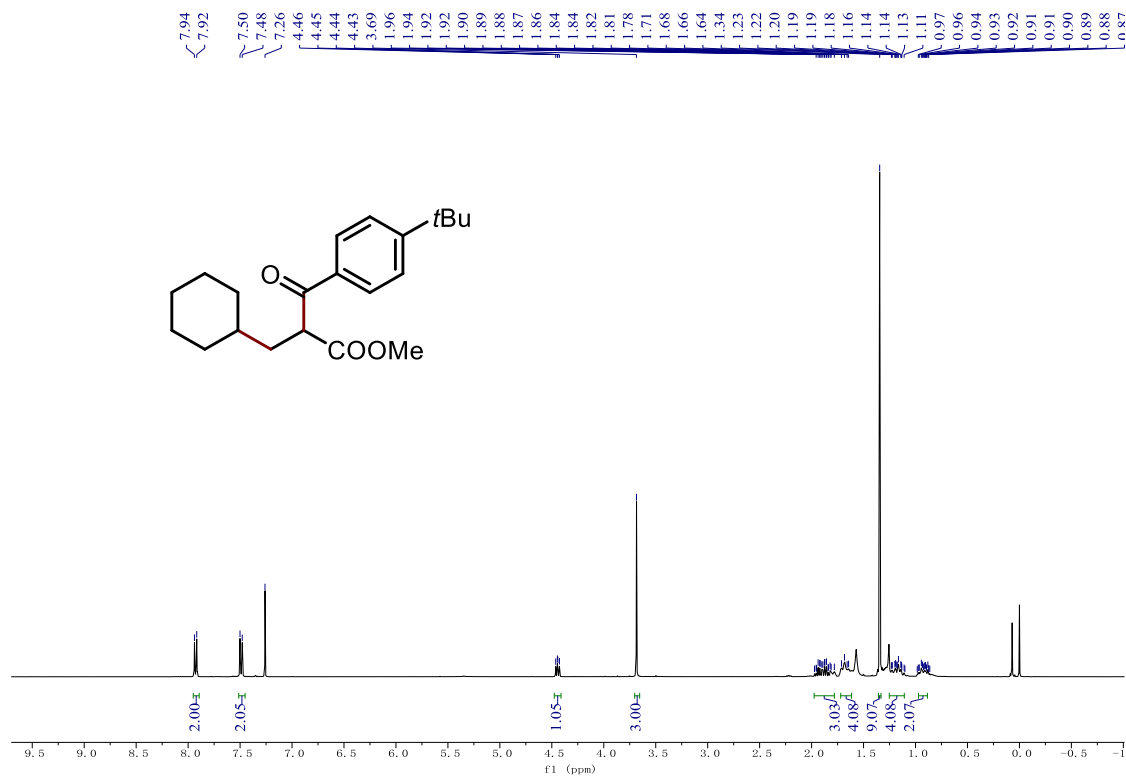

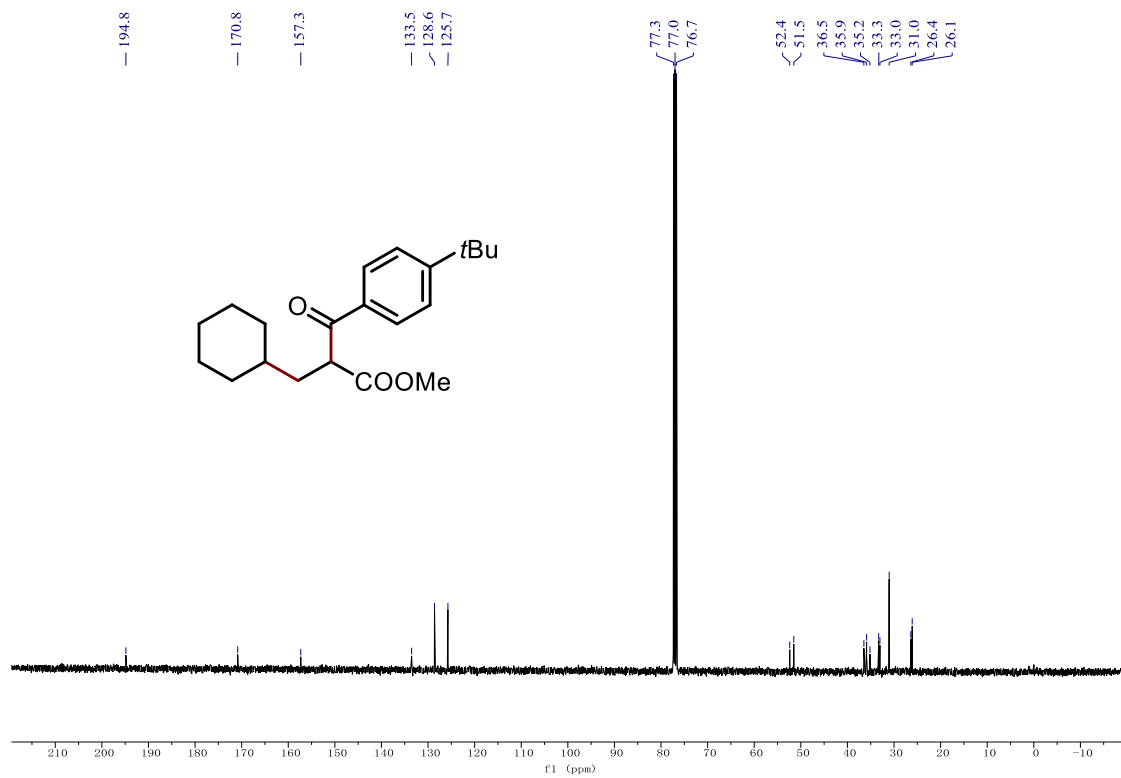

### Methyl 2-(cyclohexylmethyl)-3-(4-methoxyphenyl)-3-oxopropanoate (10)

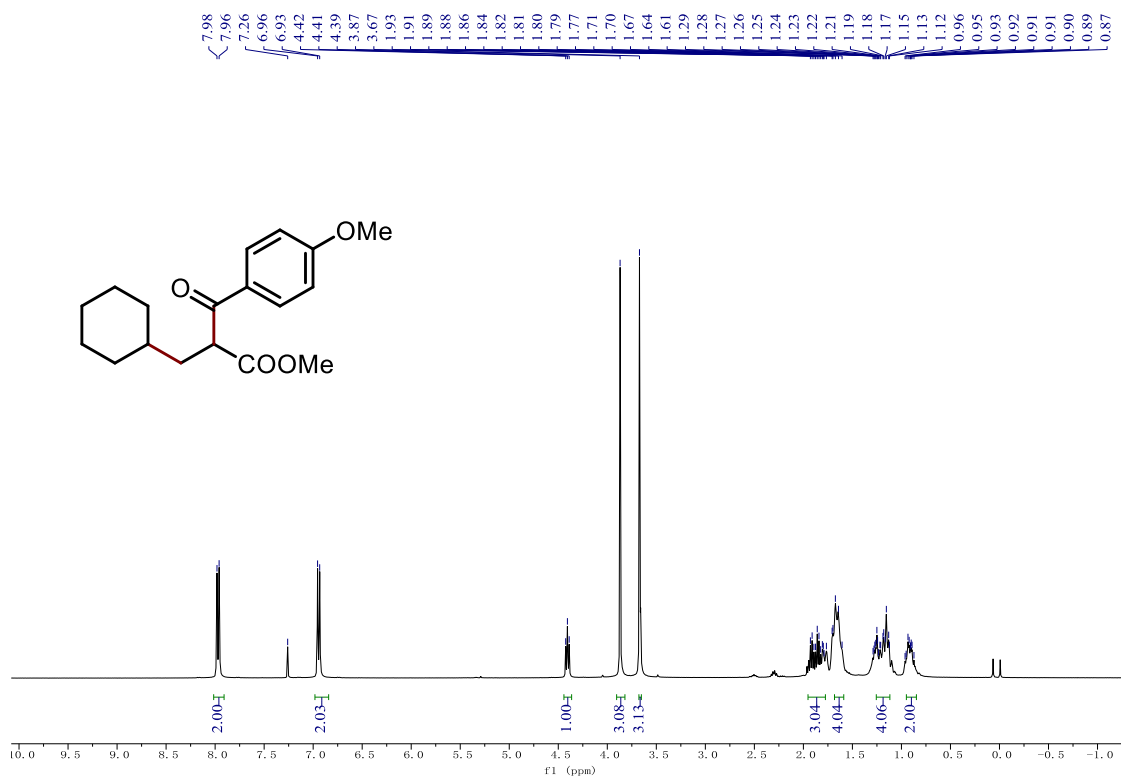

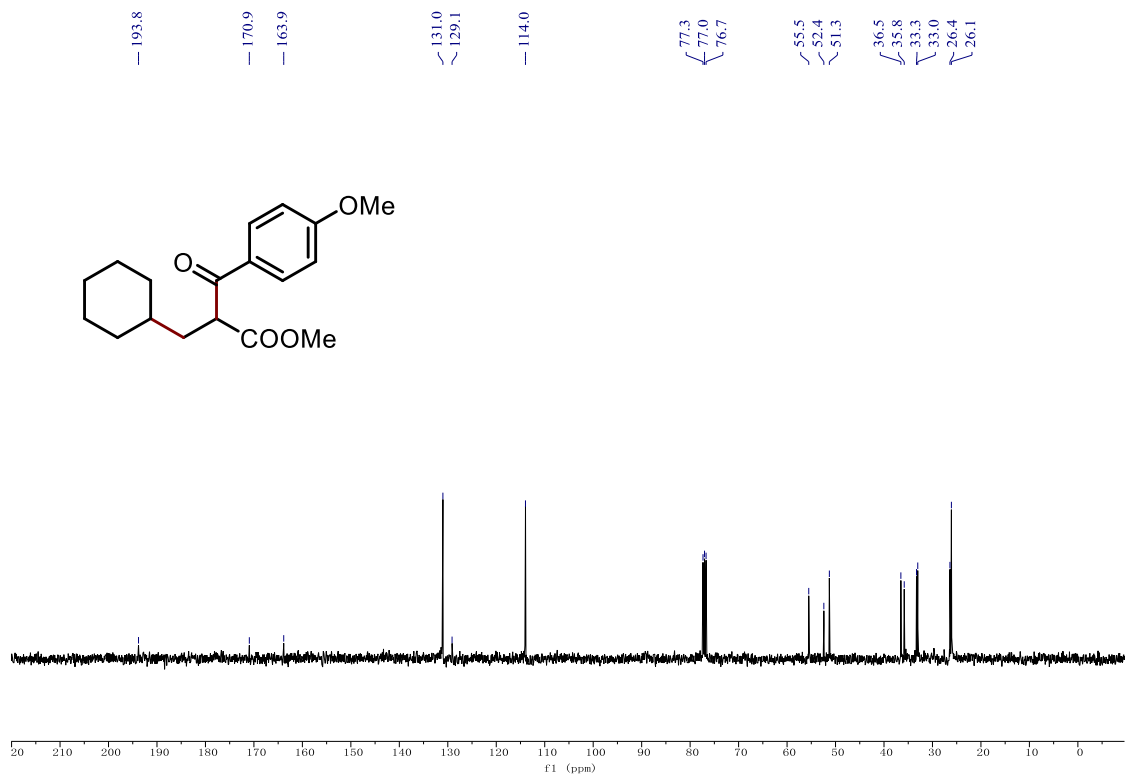

### Methyl 2-(cyclohexylmethyl)-3-(3-methoxyphenyl)-3-oxopropanoate (11)

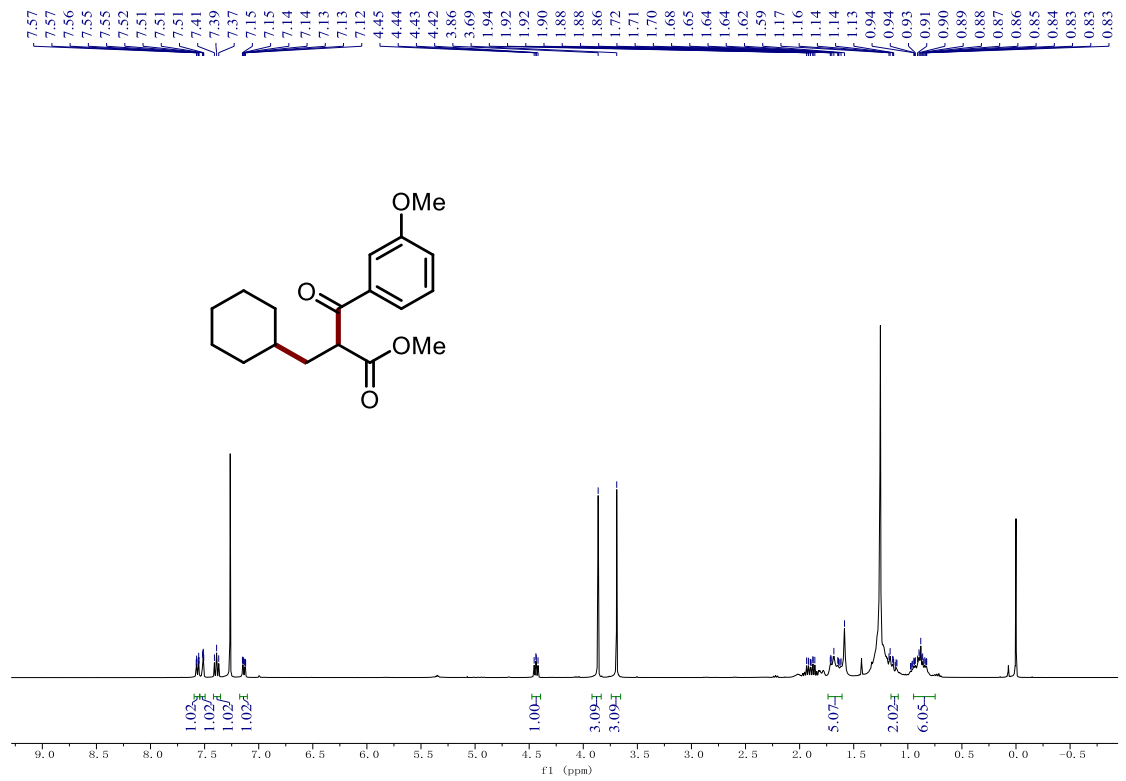

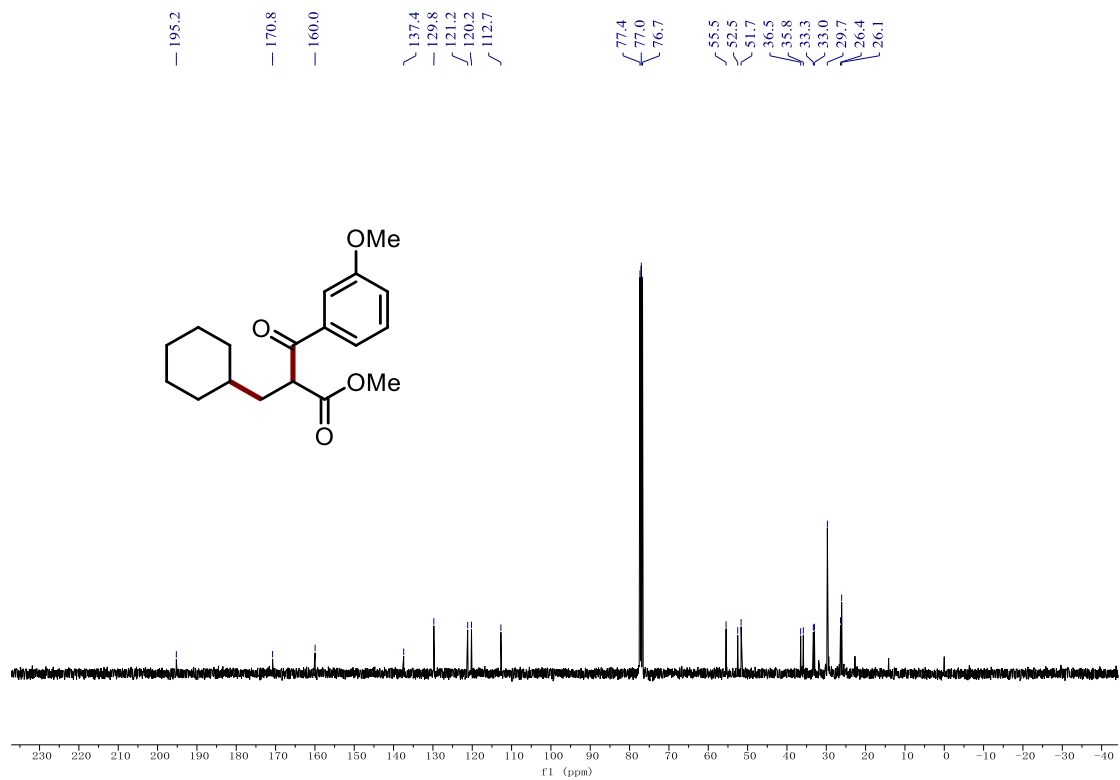

### Methyl 2-(cyclohexylmethyl)-3-oxo-3-(4-(trifluoromethyl)phenyl)propanoate (12)

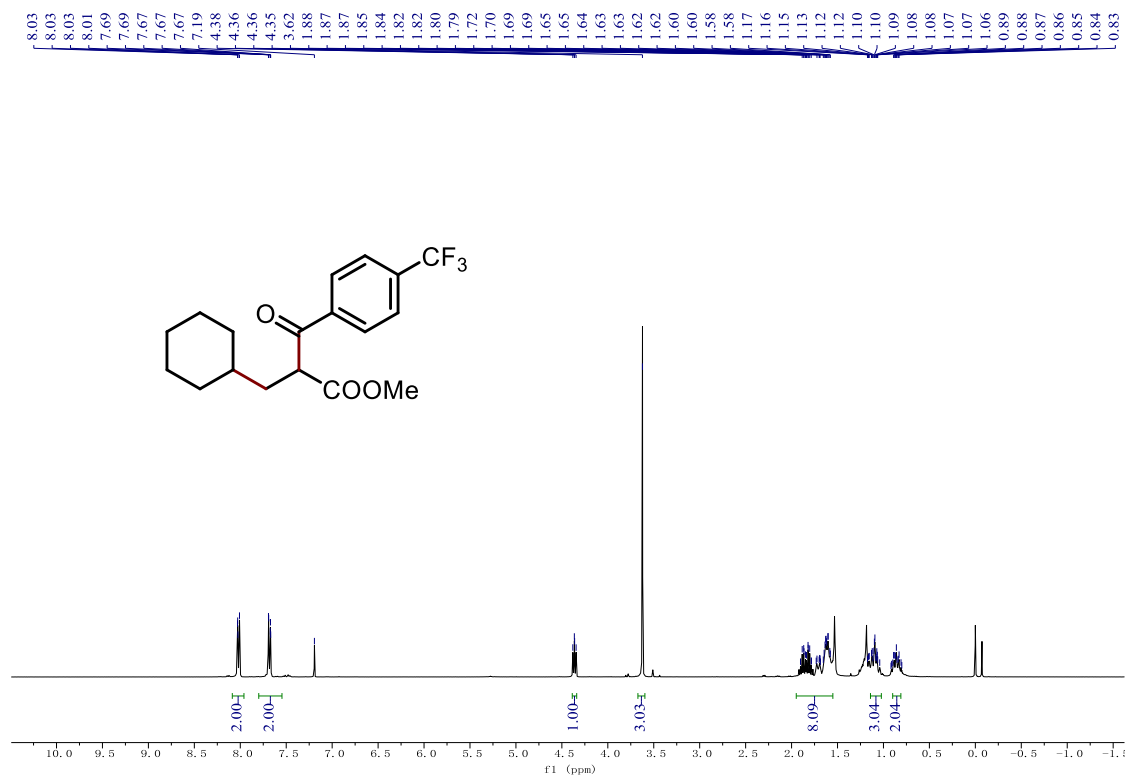

— 194.4

— 170.3

— 138.8

↙ 128.9

↘ 125.9

↙ 77.3

↘ 77.0

↘ 76.7

↙ 52.6

↘ 51.9

↙ 36.2

↘ 35.8

↘ 33.2

↘ 33.0

↘ 26.3

↘ 26.0

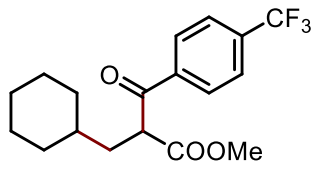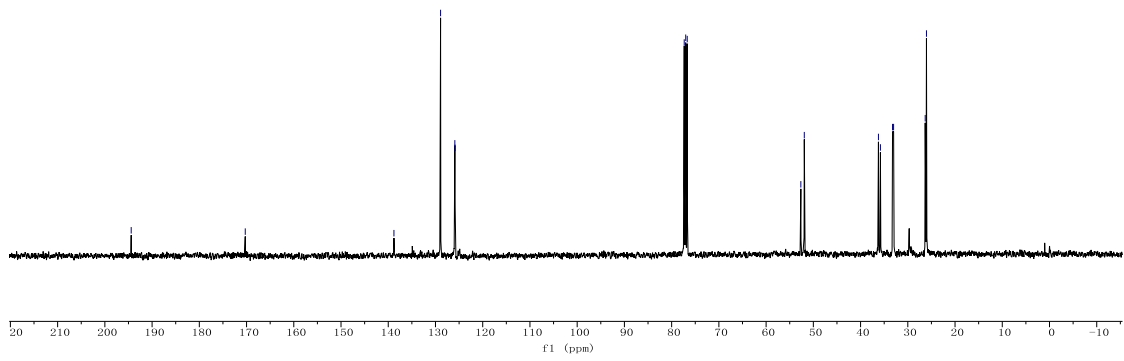

— -63.2

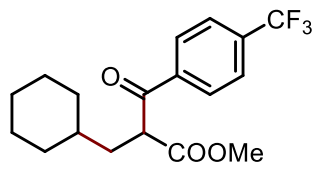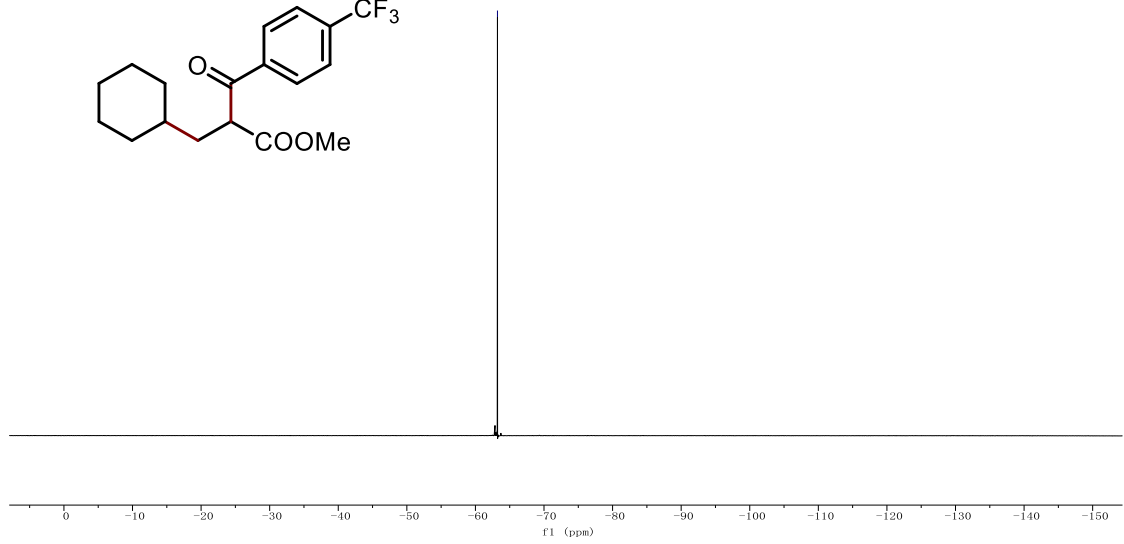

# Methyl 4-(2-(cyclohexylmethyl)-3-methoxy-3-oxopropanoyl)benzoate (13)

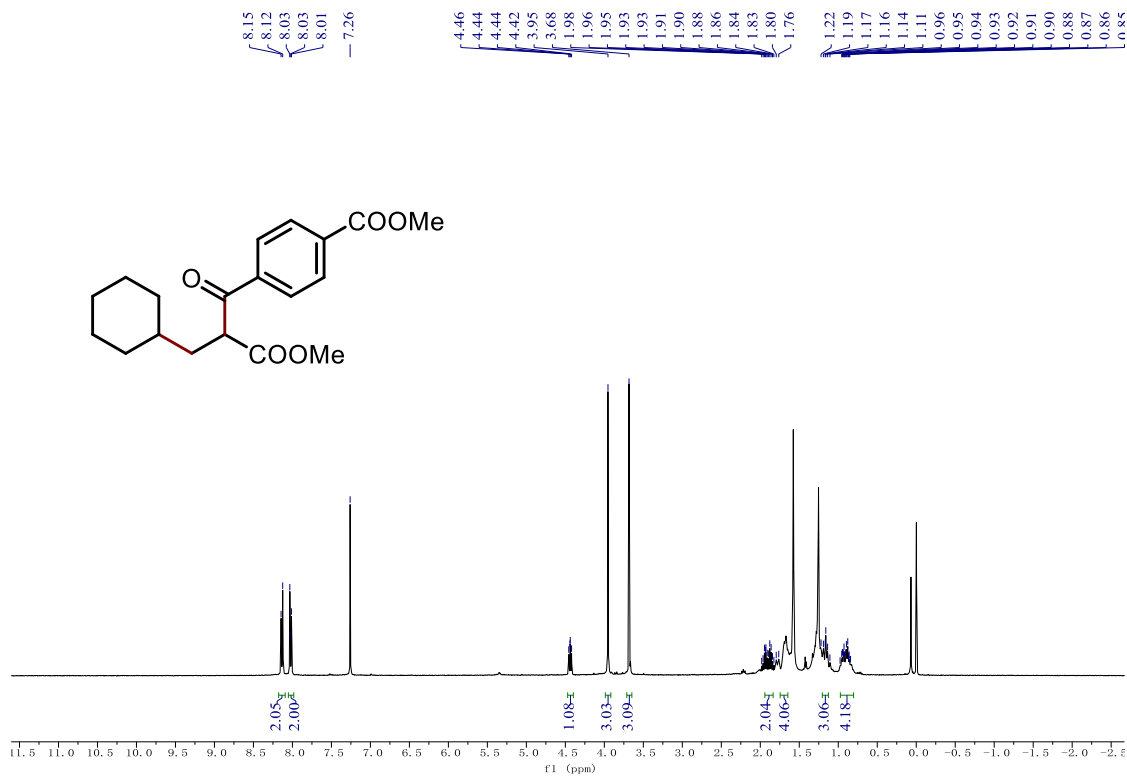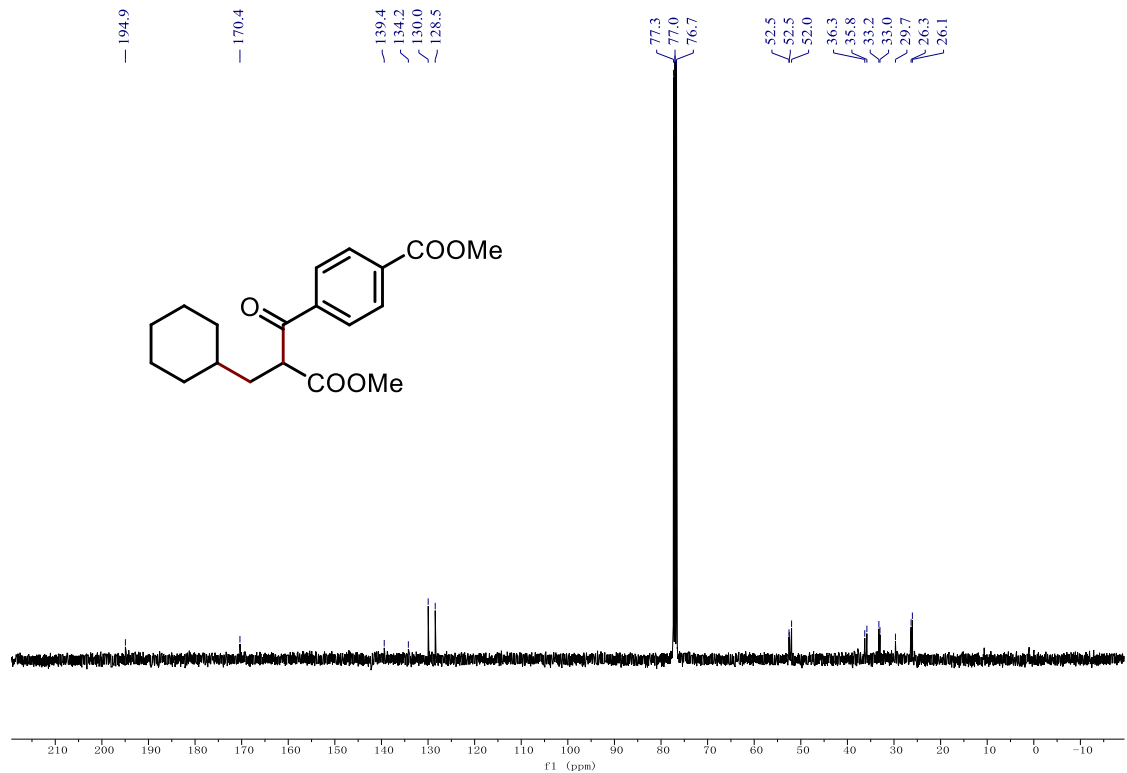

# Methyl 2-(cyclohexylmethyl)-3-(4-fluorophenyl)-3-oxopropanoate (14)

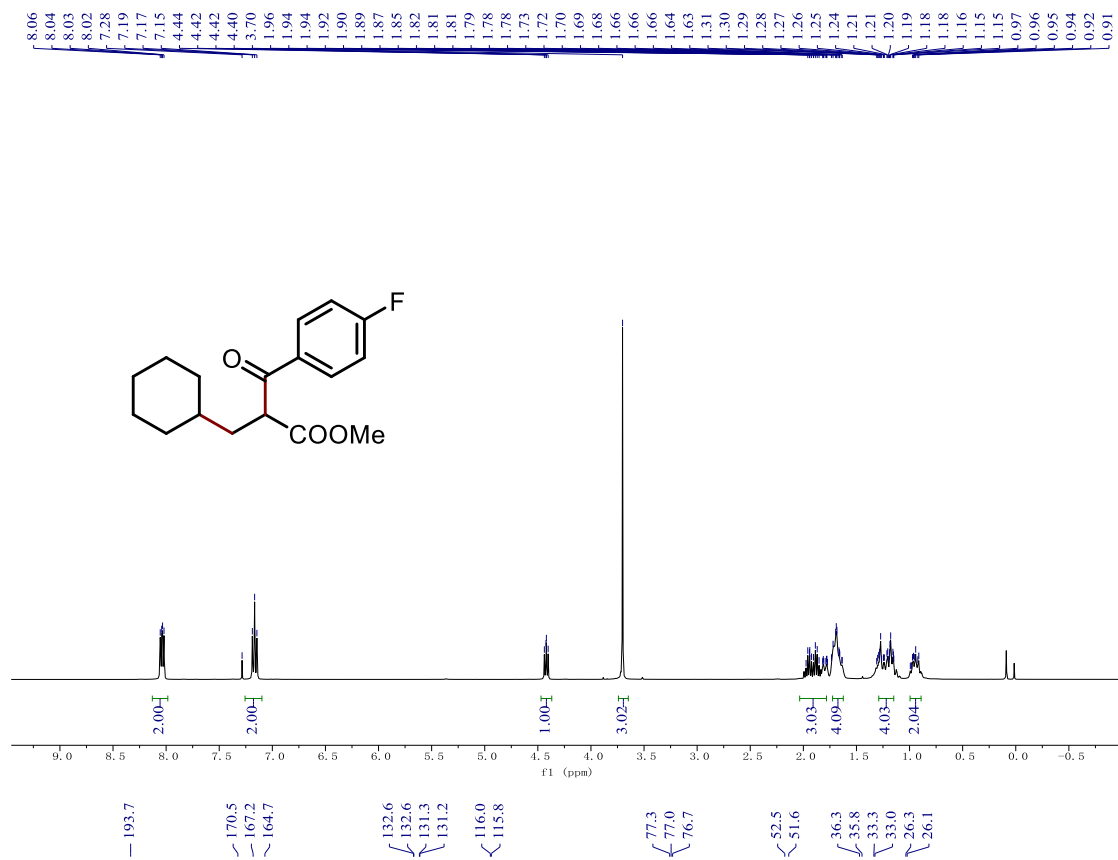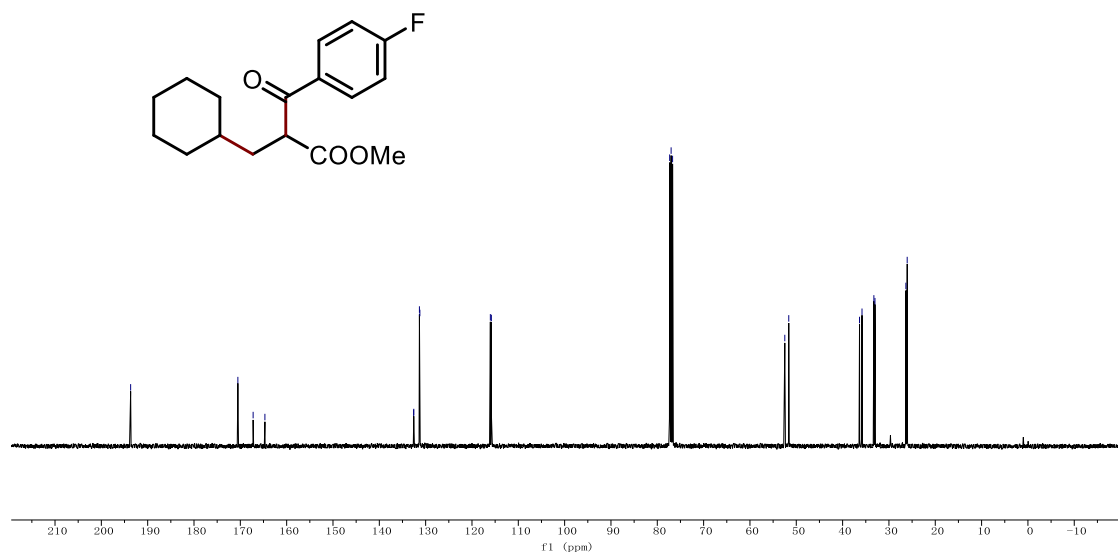

# Methyl 3-(4-chlorophenyl)-2-(cyclohexylmethyl)-3-oxopropanoate (15)

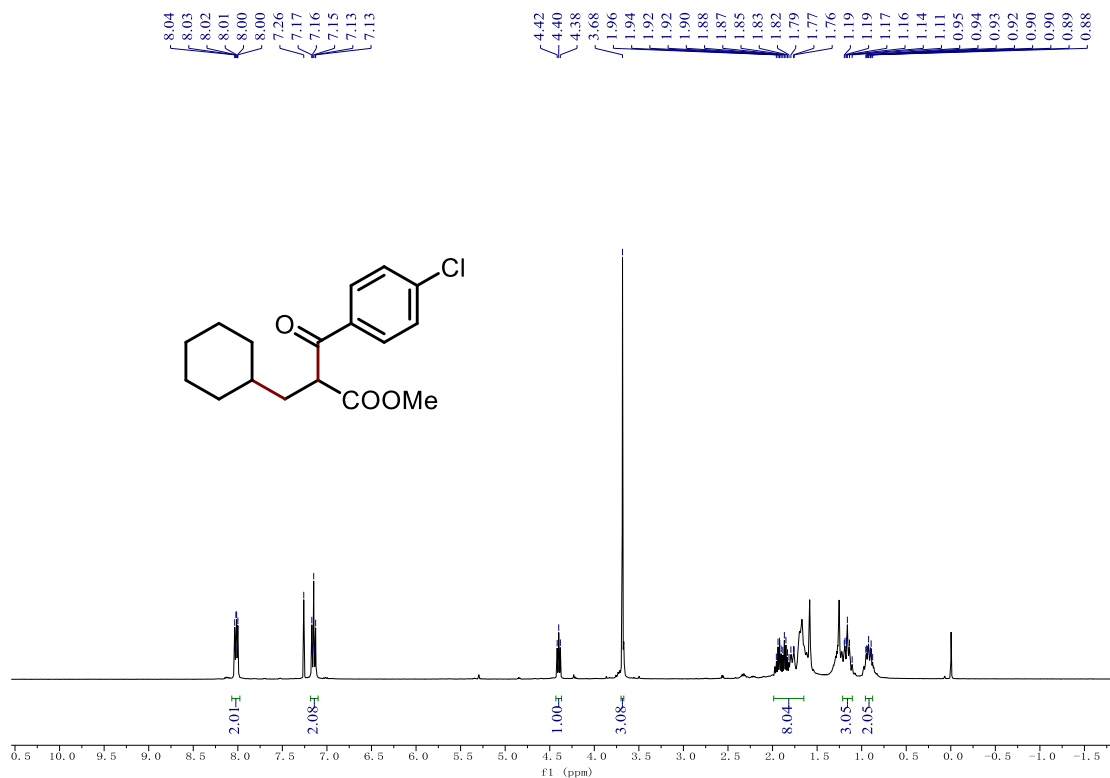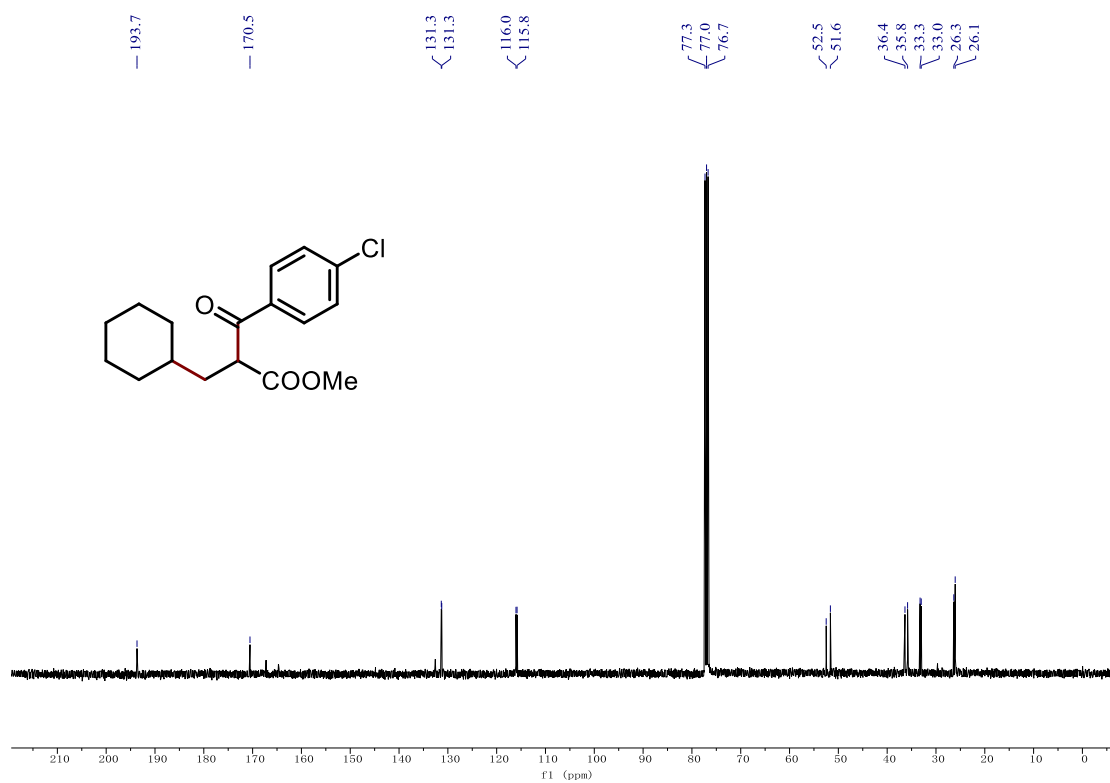



**Methyl 3-(4-(chloromethyl)phenyl)-2-(cyclohexylmethyl)-3-oxopropanoate (16)**

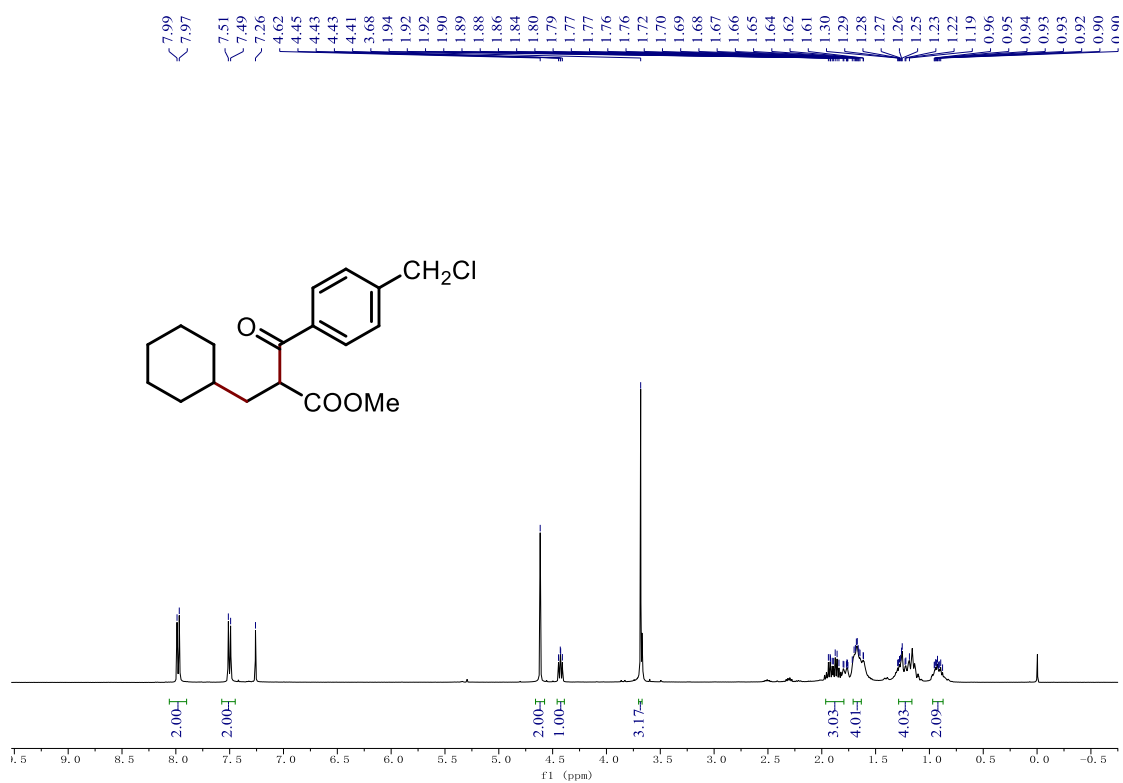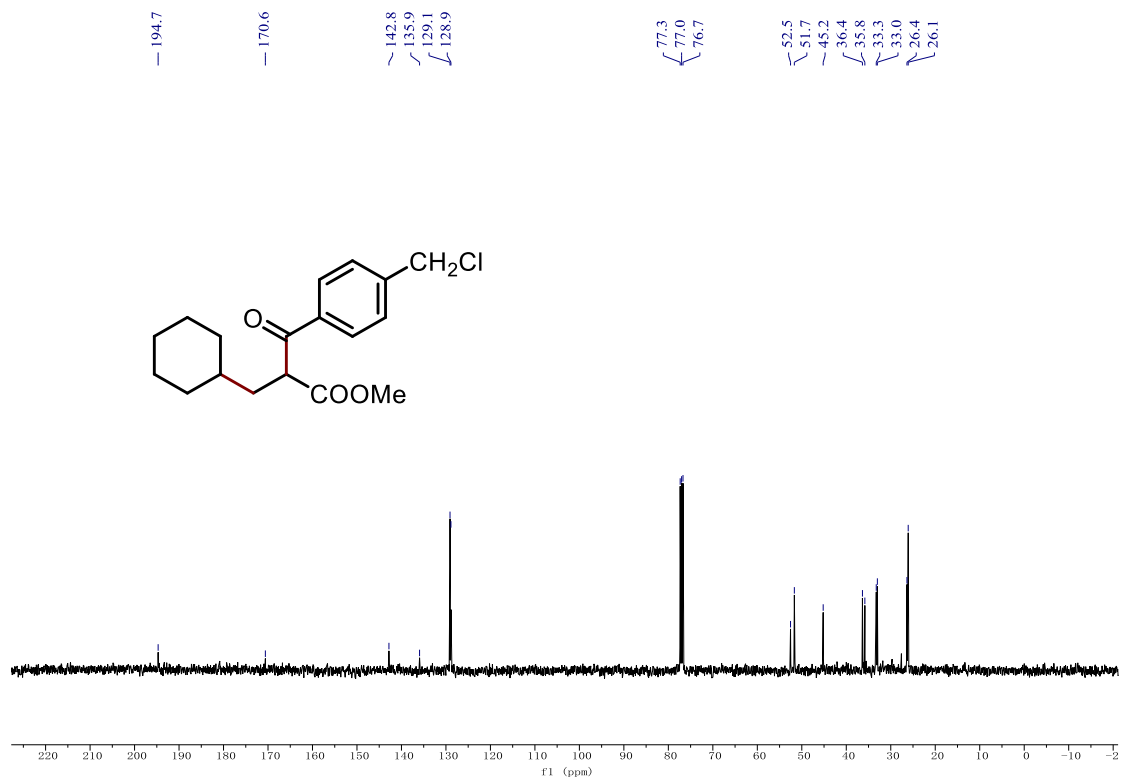

# Methyl 2-(cyclohexylmethyl)-3-(furan-2-yl)-3-oxopropanoate (17)

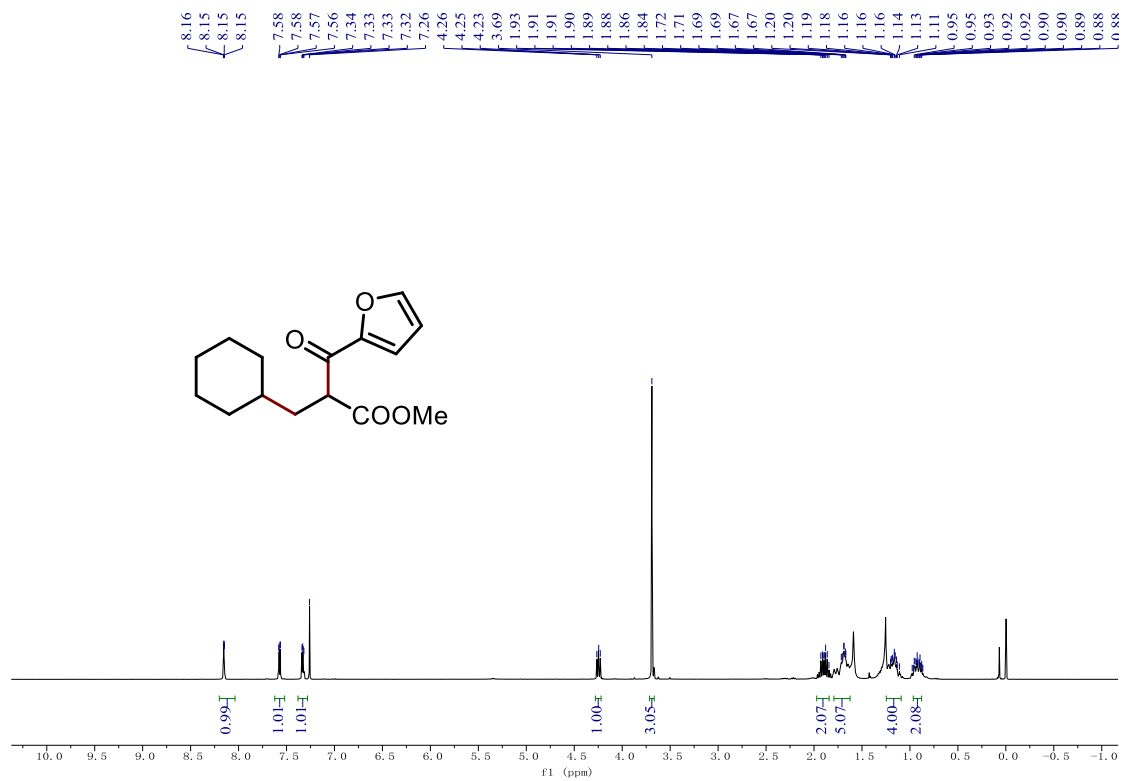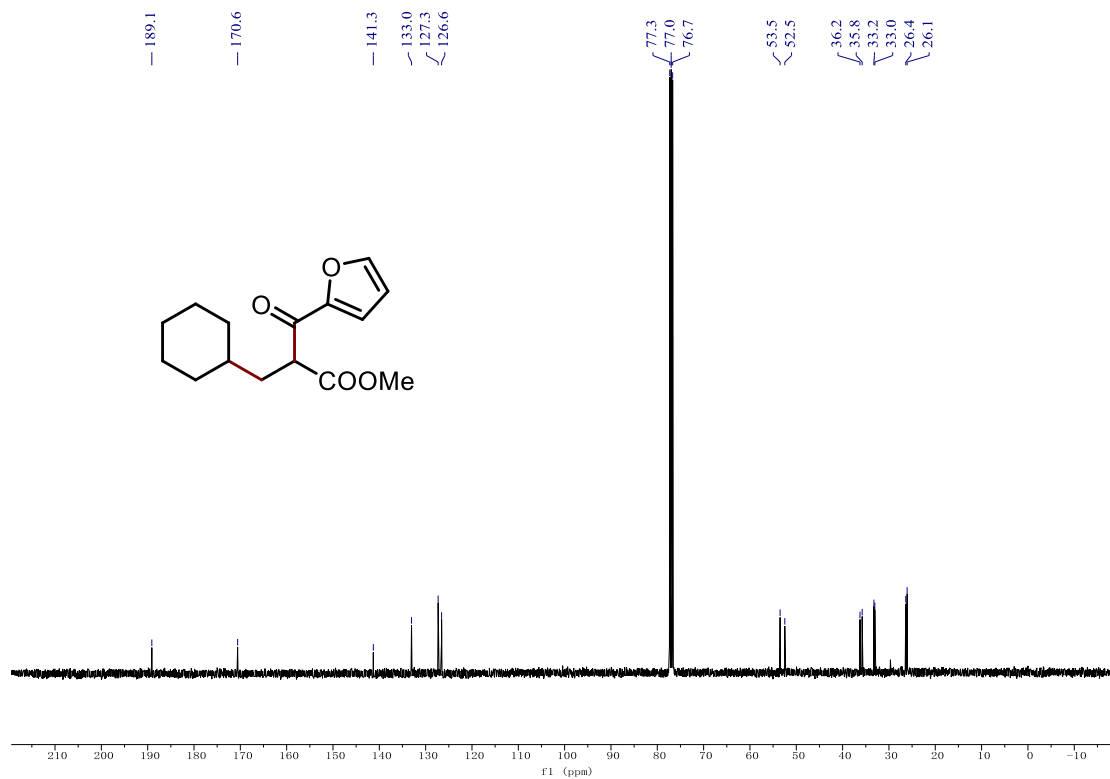

# Methyl 3-(benzofuran-5-yl)-2-(cyclohexylmethyl)-3-oxopropanoate (18)

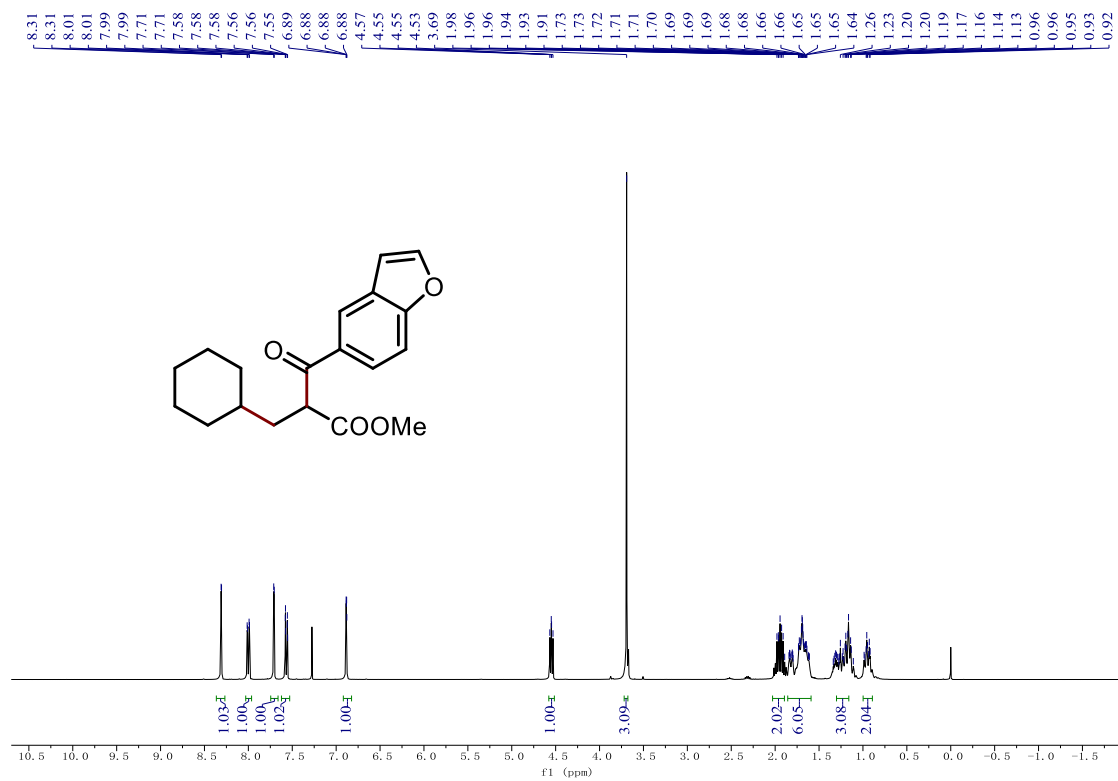

- 194.7
- 170.8
- 157.6
- 146.5
- ✓ 131.5
- ✓ 127.6
- ✓ 125.2
- ✓ 122.9
- 111.7
- 107.3
- ← 77.3
- ← 77.0
- ← 76.7
- ← 52.4
- ← 51.5
- ← 36.5
- ← 35.7
- ← 33.2
- ← 32.9
- ← 26.3
- ← 26.0

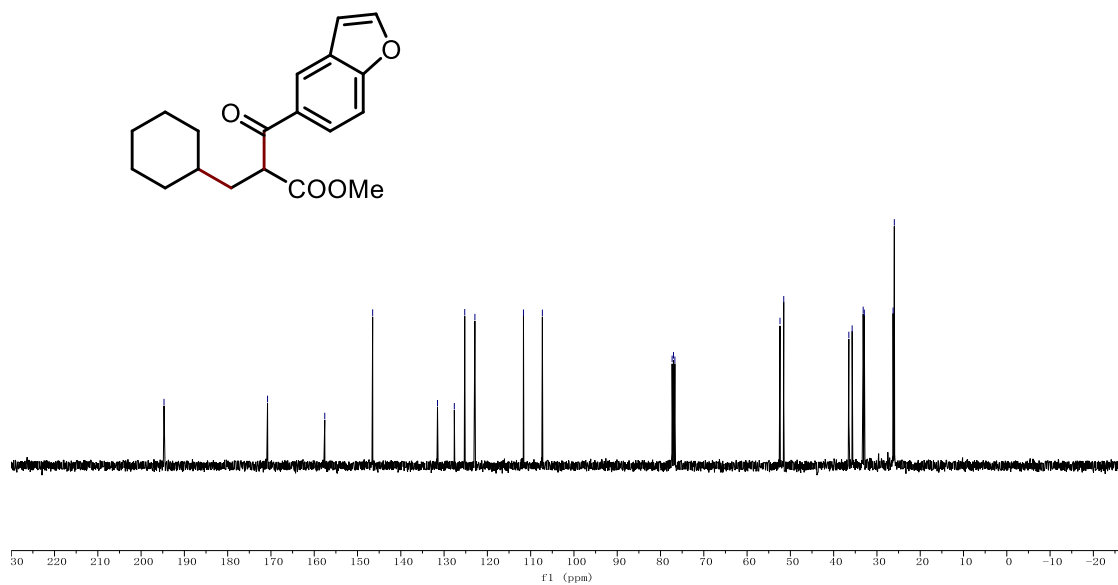

# Ethyl 2-(3-methylbenzoyl)-4-oxooctanoate (19)

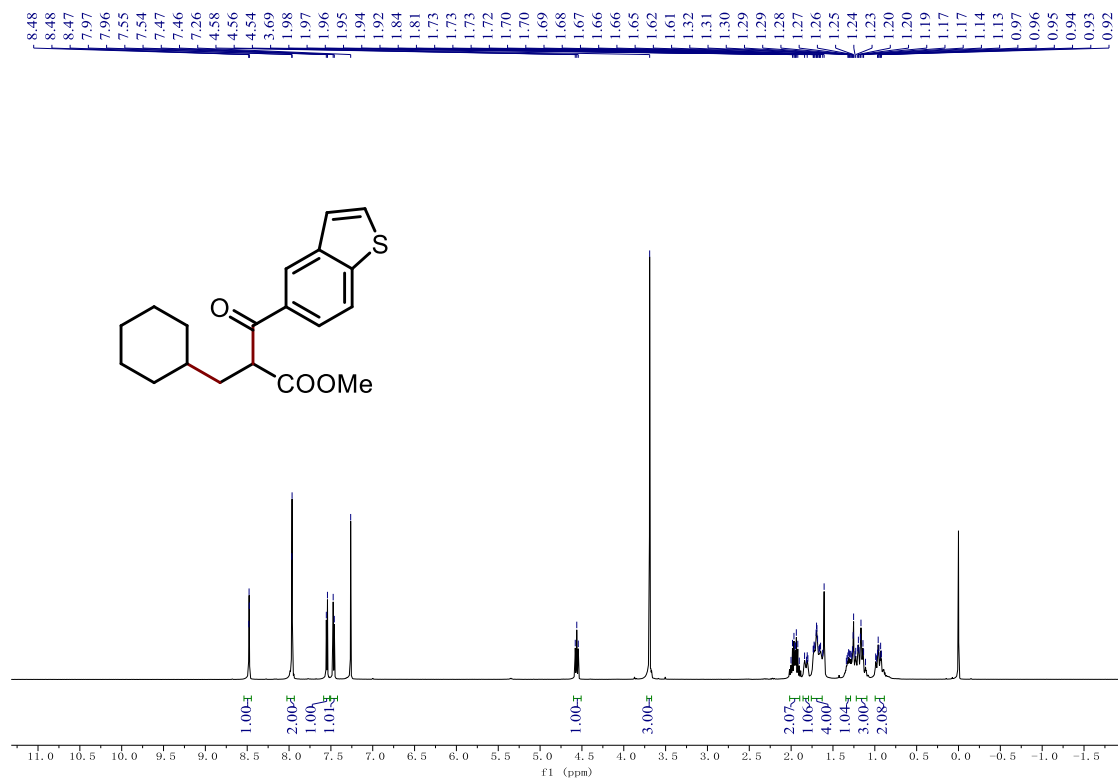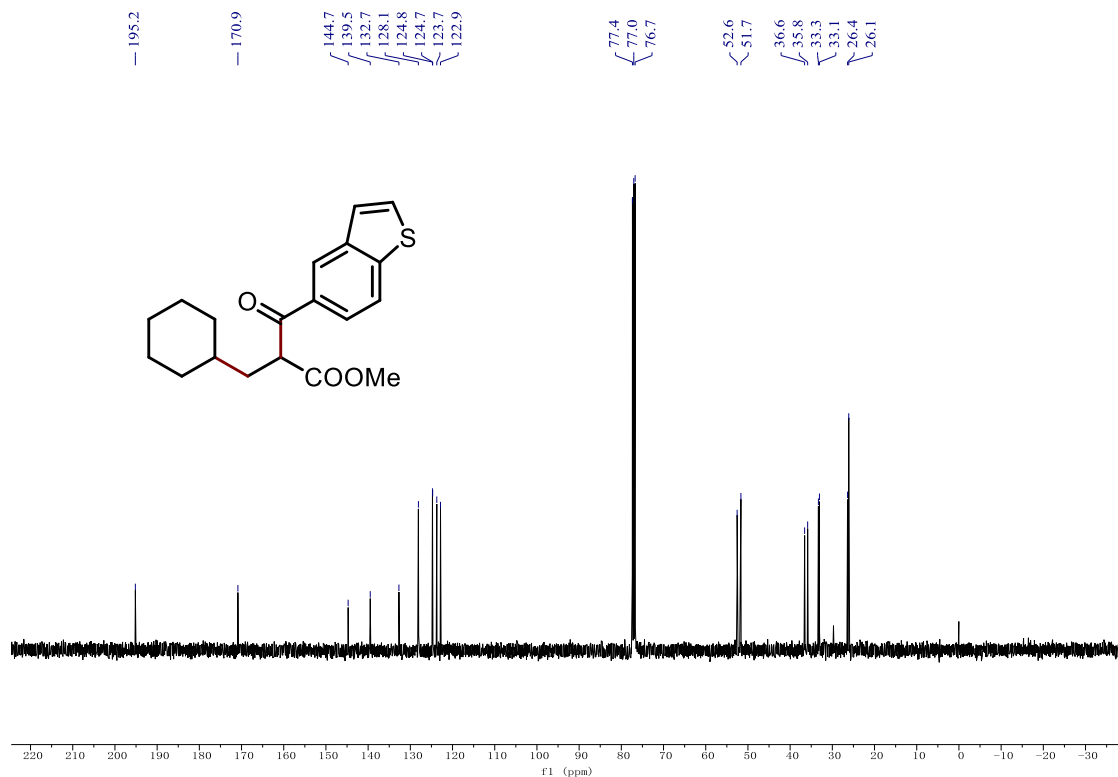

# Methyl 2-(cyclopentylmethyl)-3-oxo-3-(p-tolyl)propanoate (20)

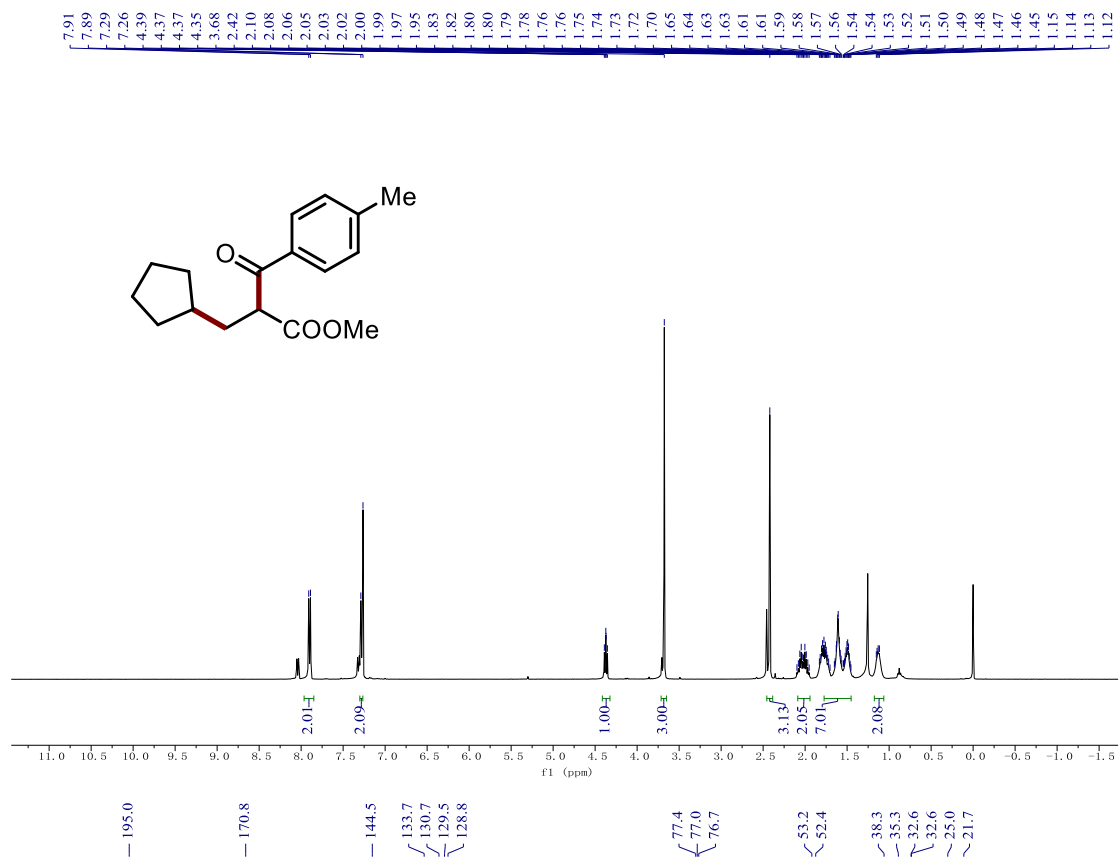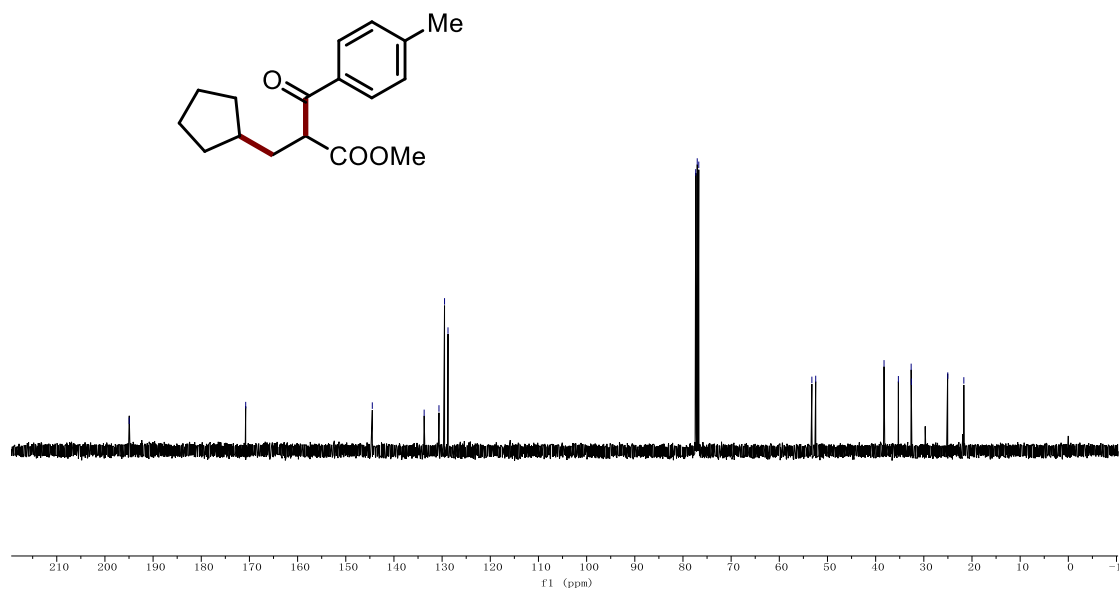

# Methyl 2-(bicyclo[2.2.1]heptan-2-ylmethyl)-3-oxo-3-phenylpropanoate (21)

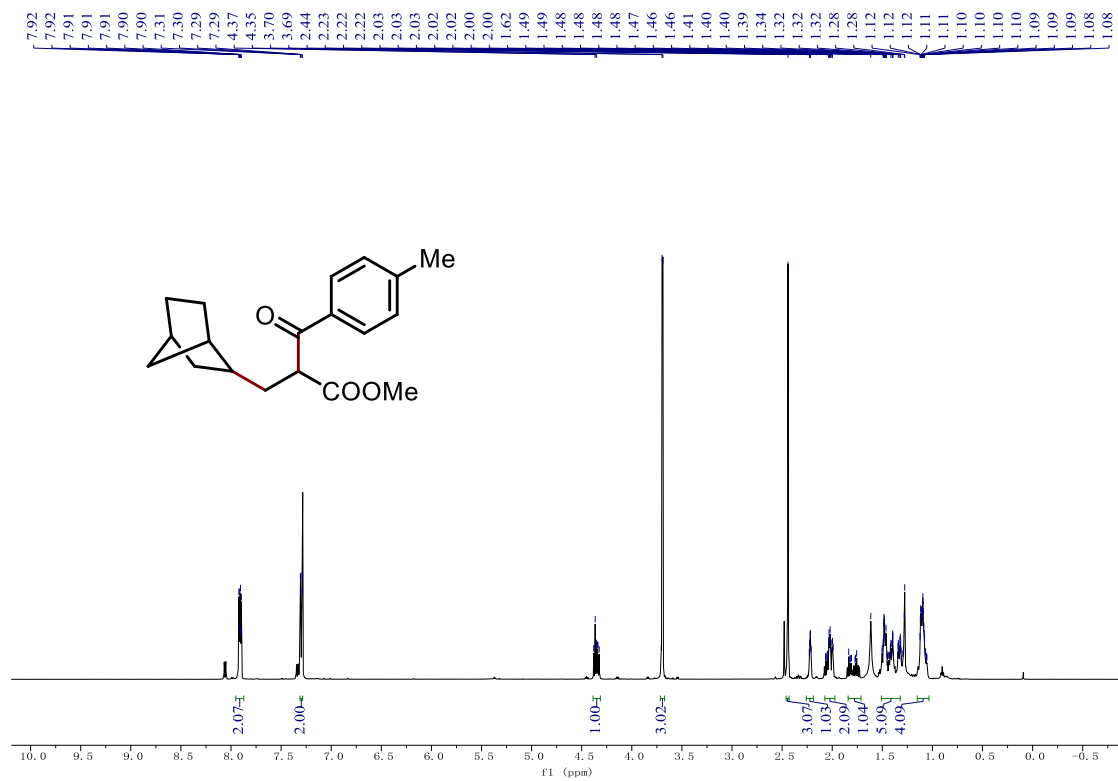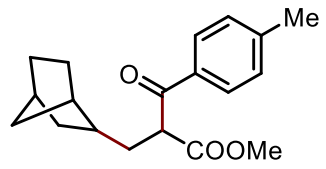

- 195.1
- 195.0
- 170.8
- 170.8
- 144.5
- 133.8
- 133.8
- 130.7
- 129.6
- 129.5
- 128.9
- 128.8
- 128.8
- 77.3
- 77.0
- 76.8
- 52.4
- 52.3
- 52.2
- 41.2
- 41.1
- 40.1
- 40.0
- 38.0
- 37.9
- 36.6
- 35.9
- 35.3
- 35.2
- 29.9
- 28.6
- 28.6
- 21.7

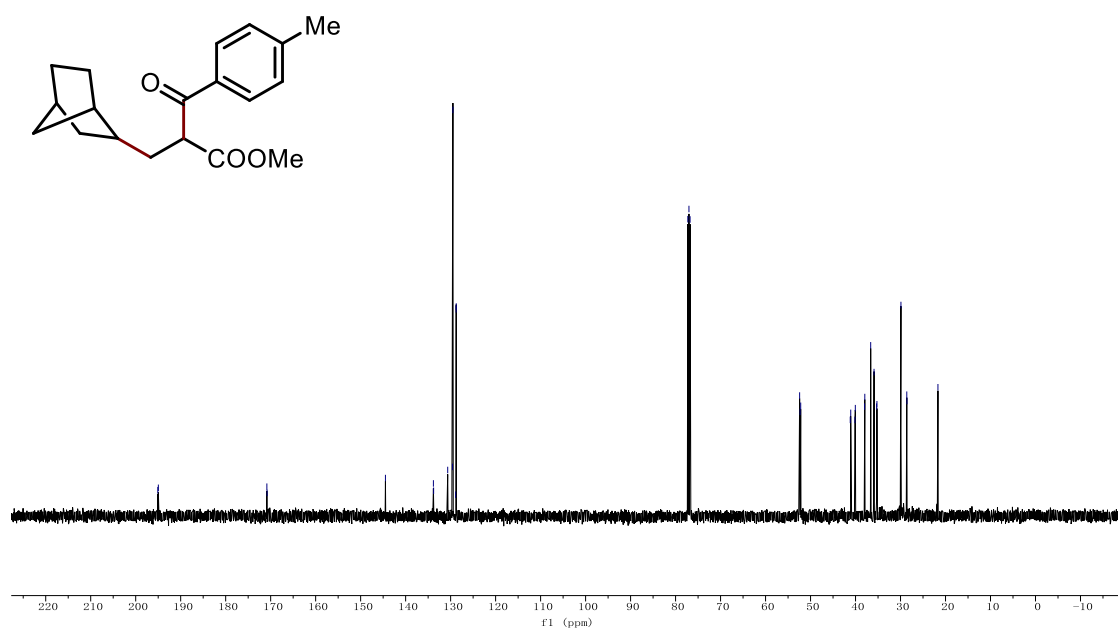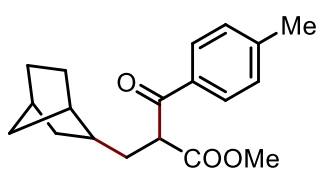

# Methyl 2-((7-oxabicyclo[2.2.1]heptan-2-yl)methyl)-3-oxo-3-phenylpropanoate (22)

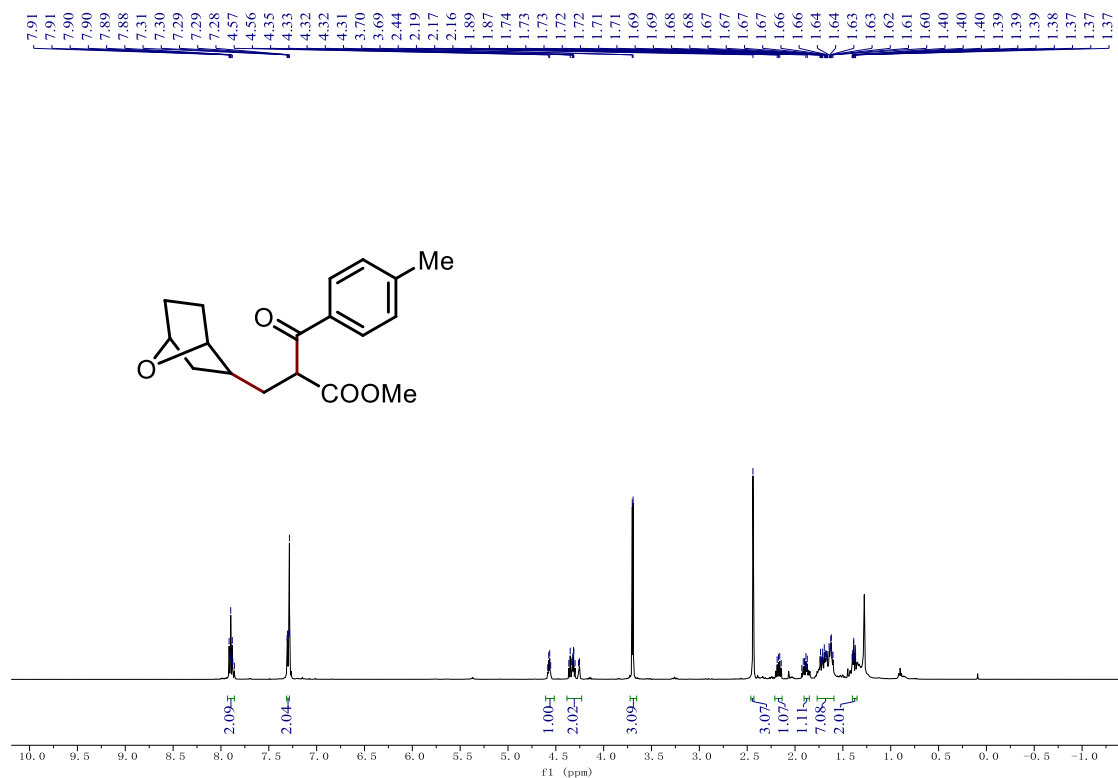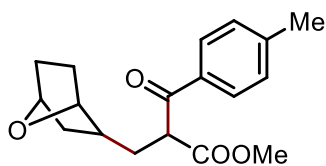

194.6  
194.5

170.5  
170.5

144.7  
144.6  
133.7  
133.6  
129.6  
128.8  
128.7

80.2  
80.0  
77.3  
77.0  
76.8  
76.5  
76.5

52.5  
51.9  
51.7  
41.4  
41.2  
37.9  
37.9  
34.5  
29.7  
29.6  
29.5  
21.7

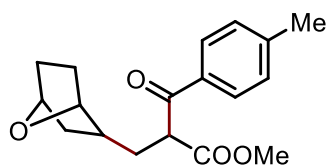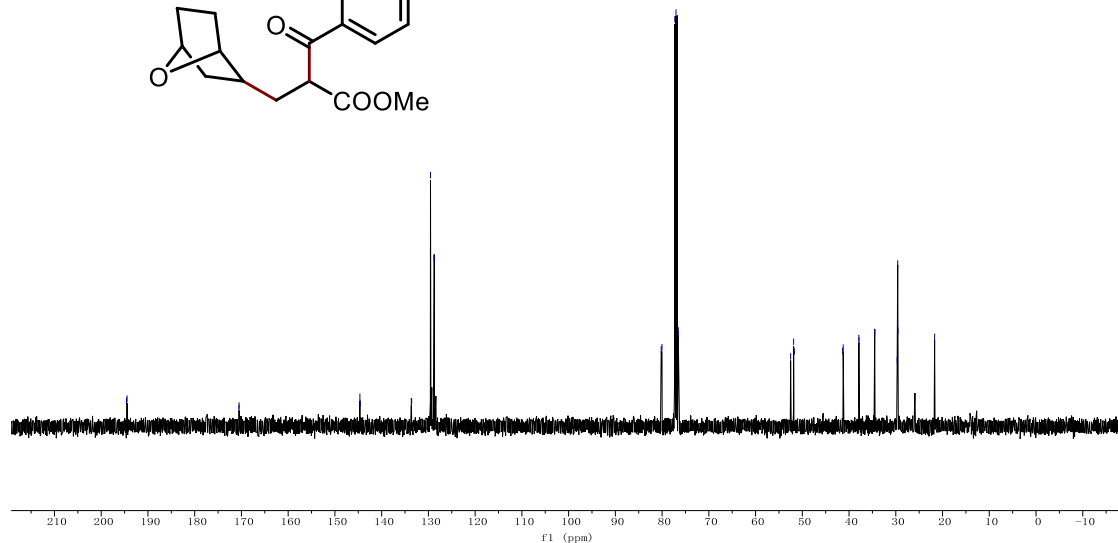

**Methyl 3-oxo-3-phenyl-2-((tetrahydrofuran-2-yl)methyl)propanoate (23)**

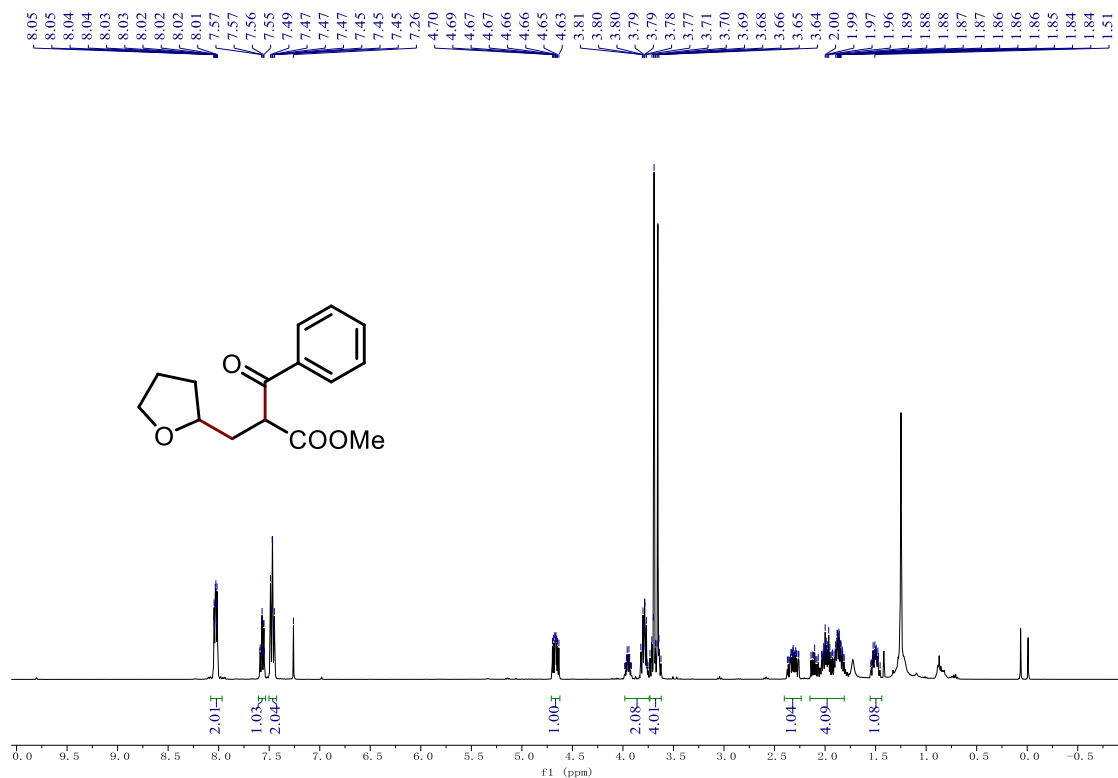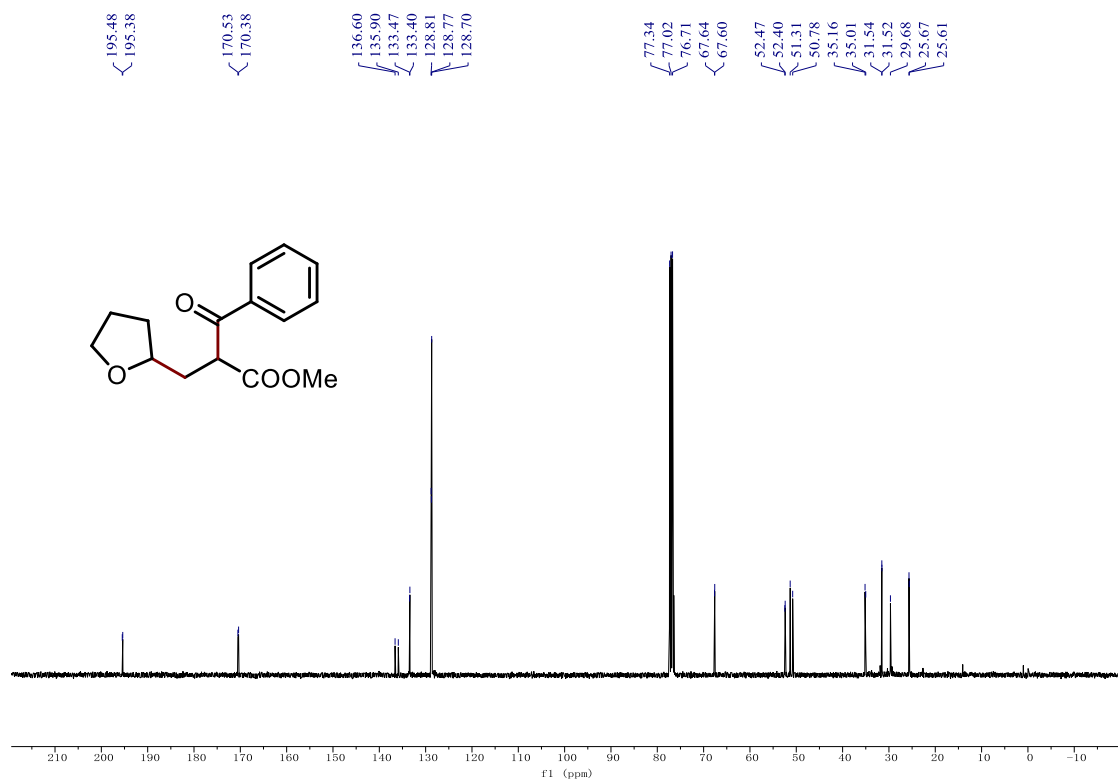



# Methyl -2-((1,4-dioxan-2-yl)methyl)-3-oxo-3-phenylpropanoate (24)

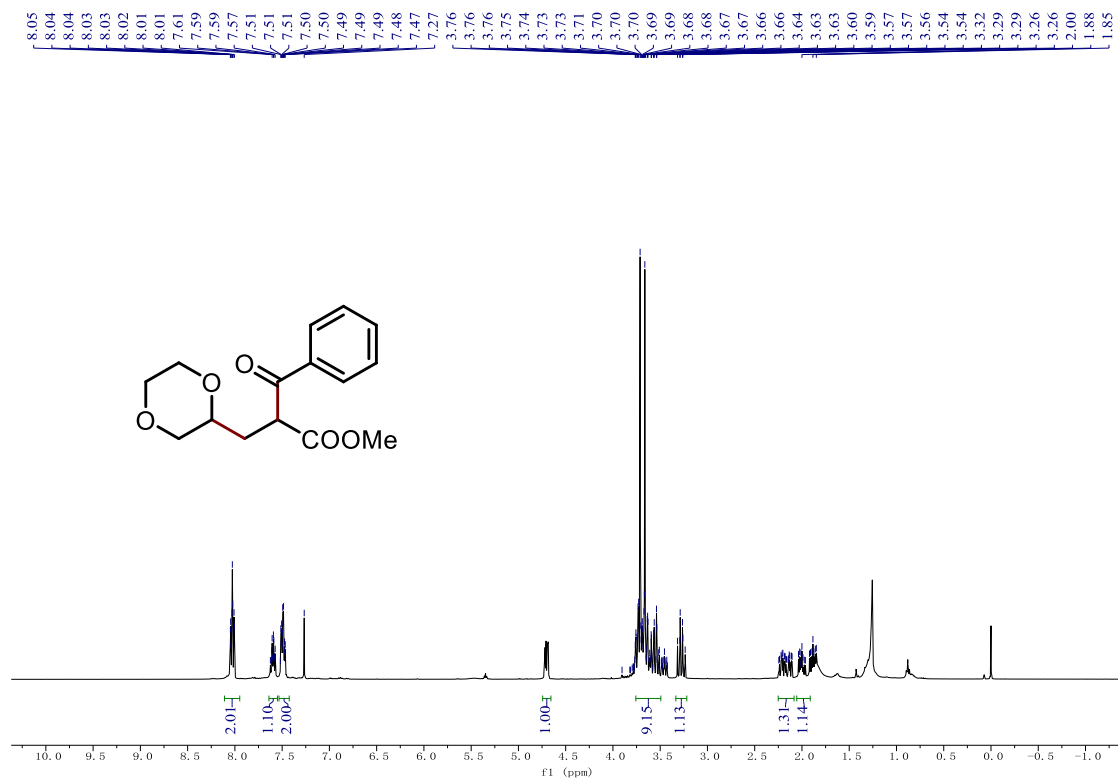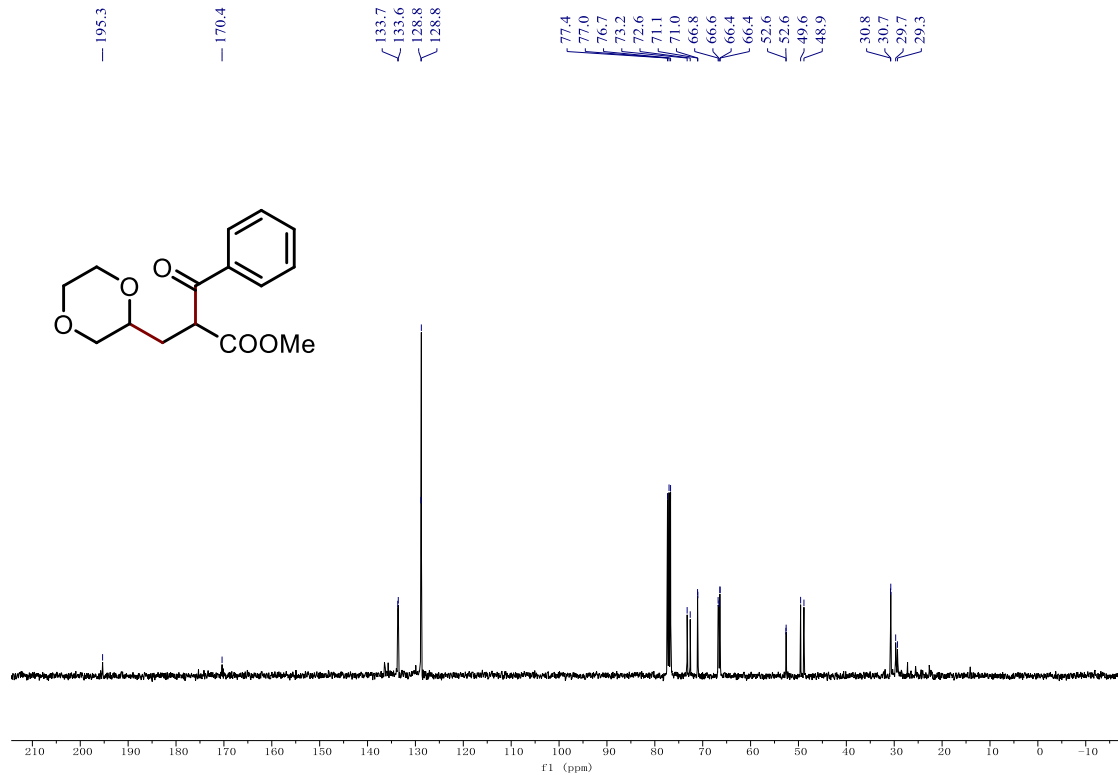

# Methyl 3-oxo-2-((3-oxocyclopentyl)methyl)-3-phenylpropanoate (25)

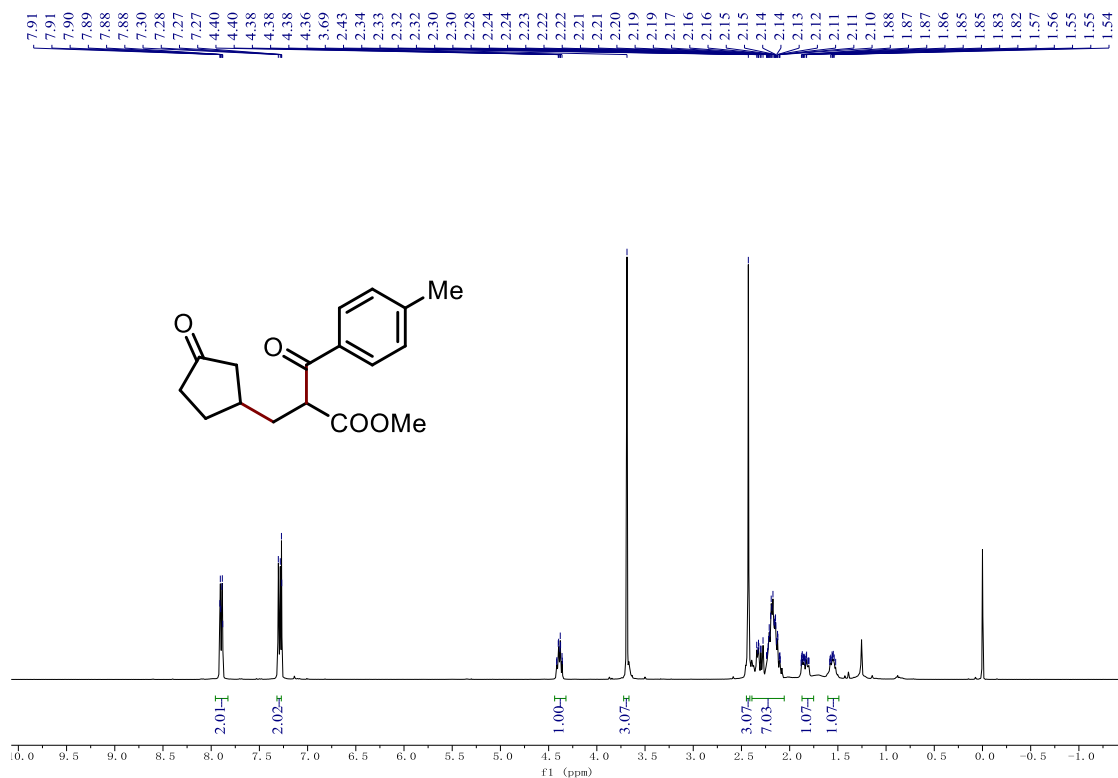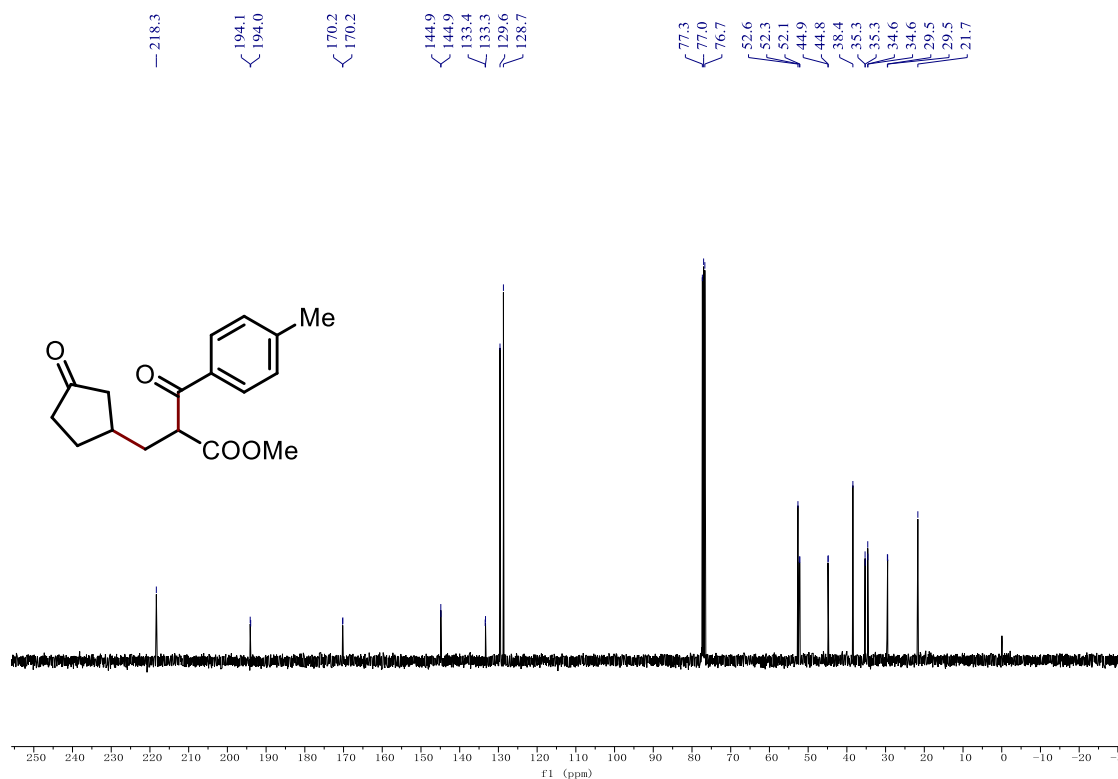

# Ethyl 2-(cyclohexylmethyl)-3-oxo-3-(p-tolyl)propanoate (26)

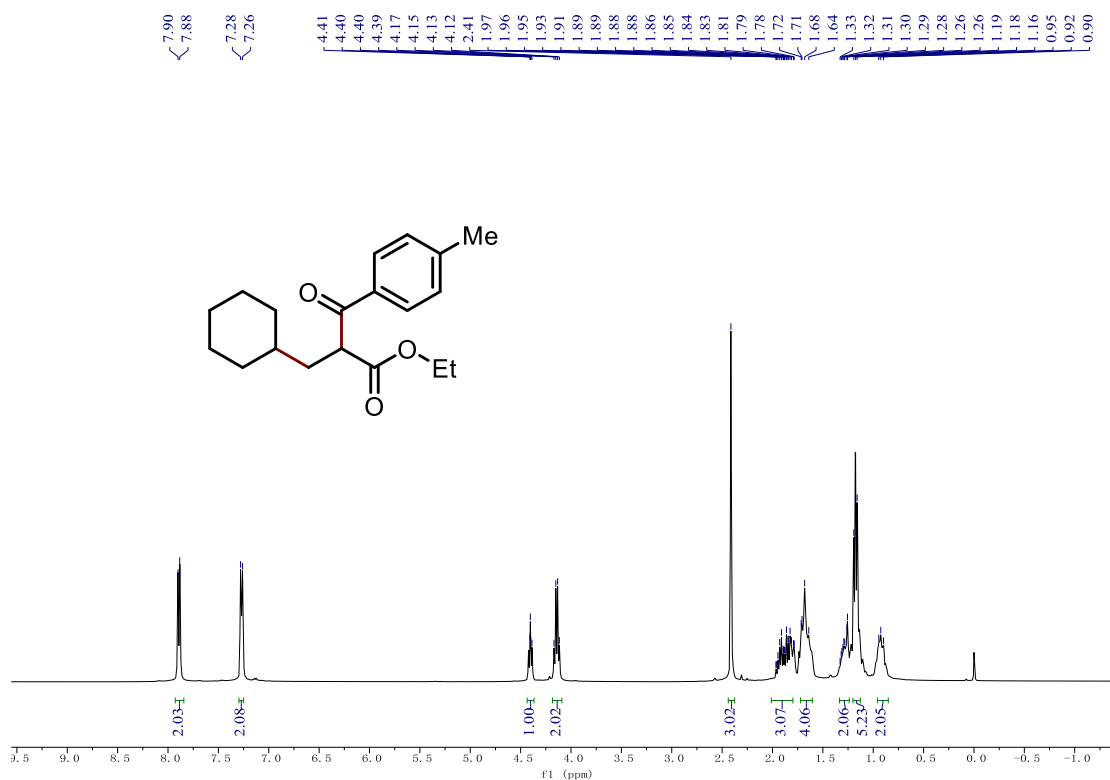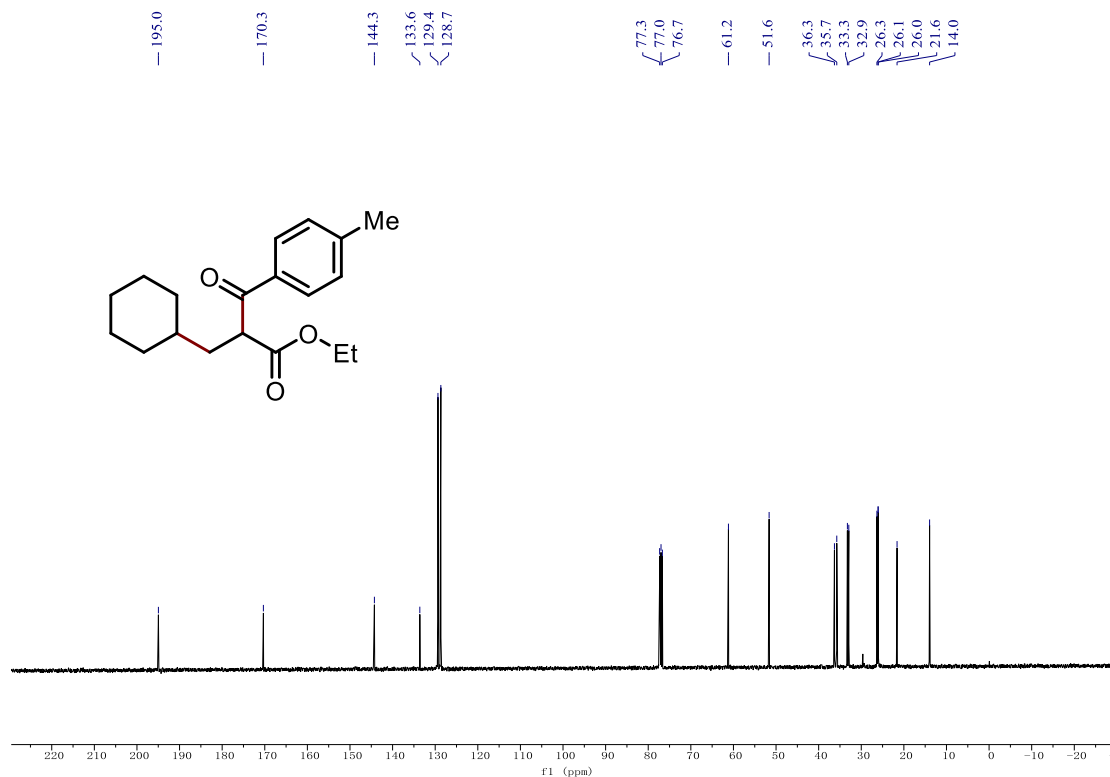

# Tert-butyl 2-(cyclohexylmethyl)-3-oxo-3-(p-tolyl)propanoate (27)

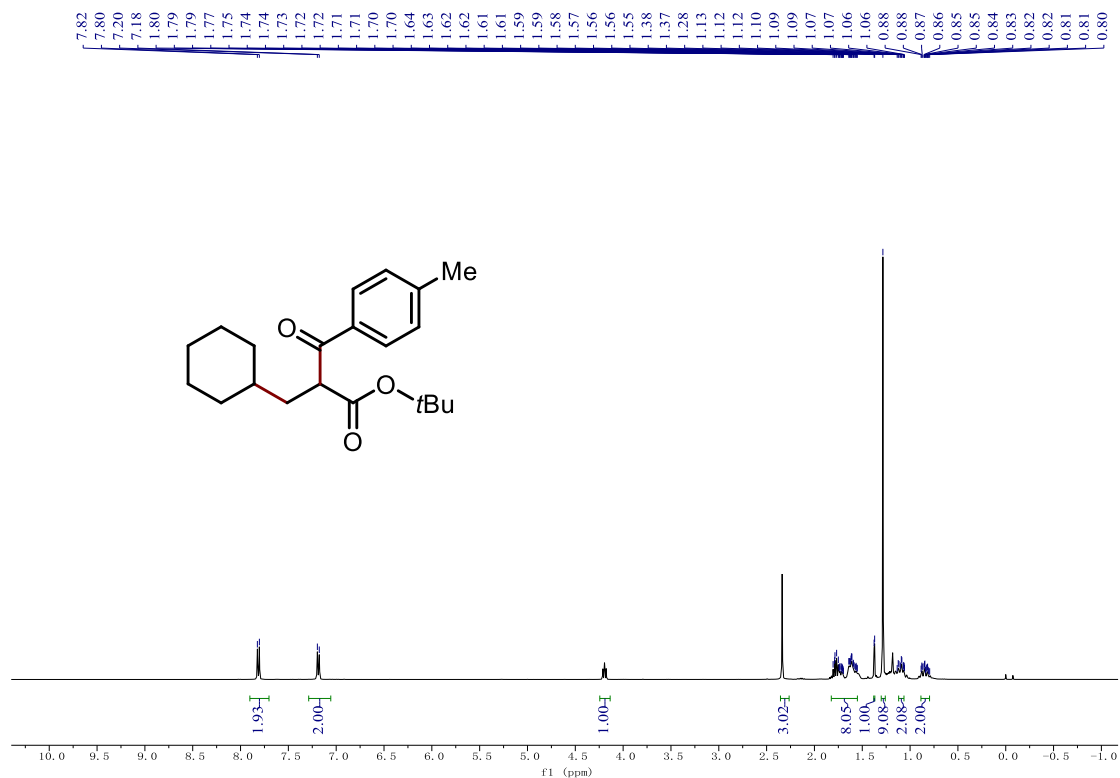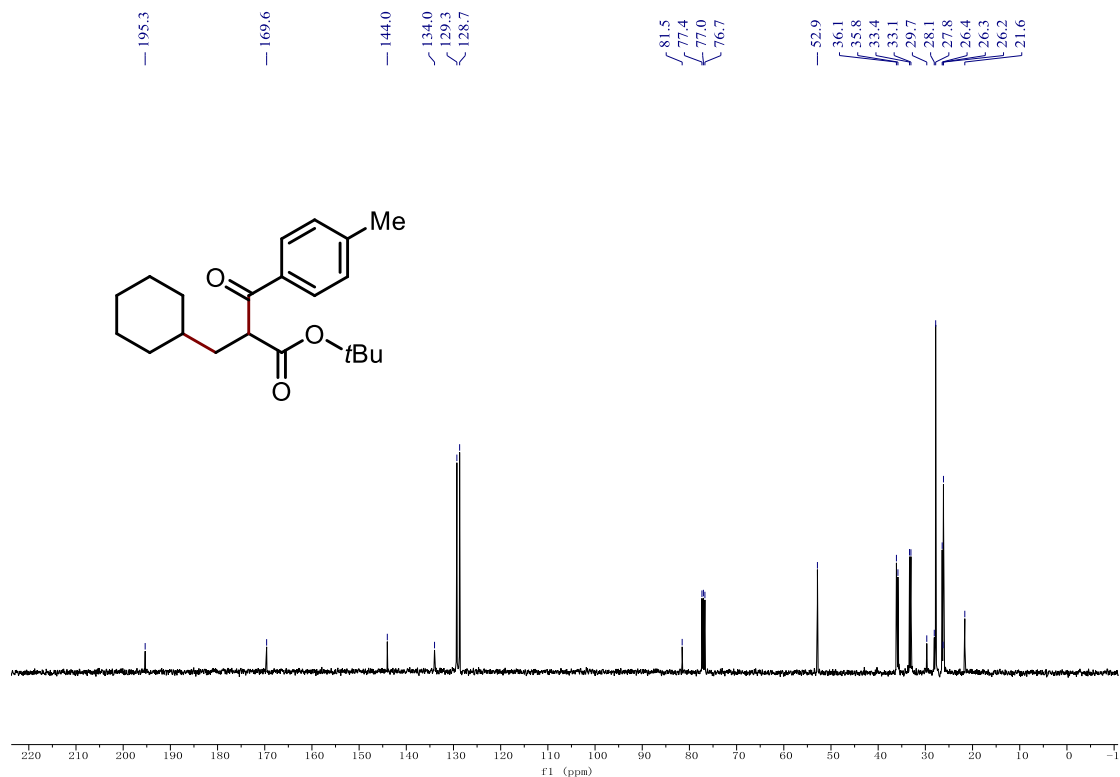

# Isobutyl 2-(cyclohexylmethyl)-3-oxo-3-(p-tolyl)propanoate (28)

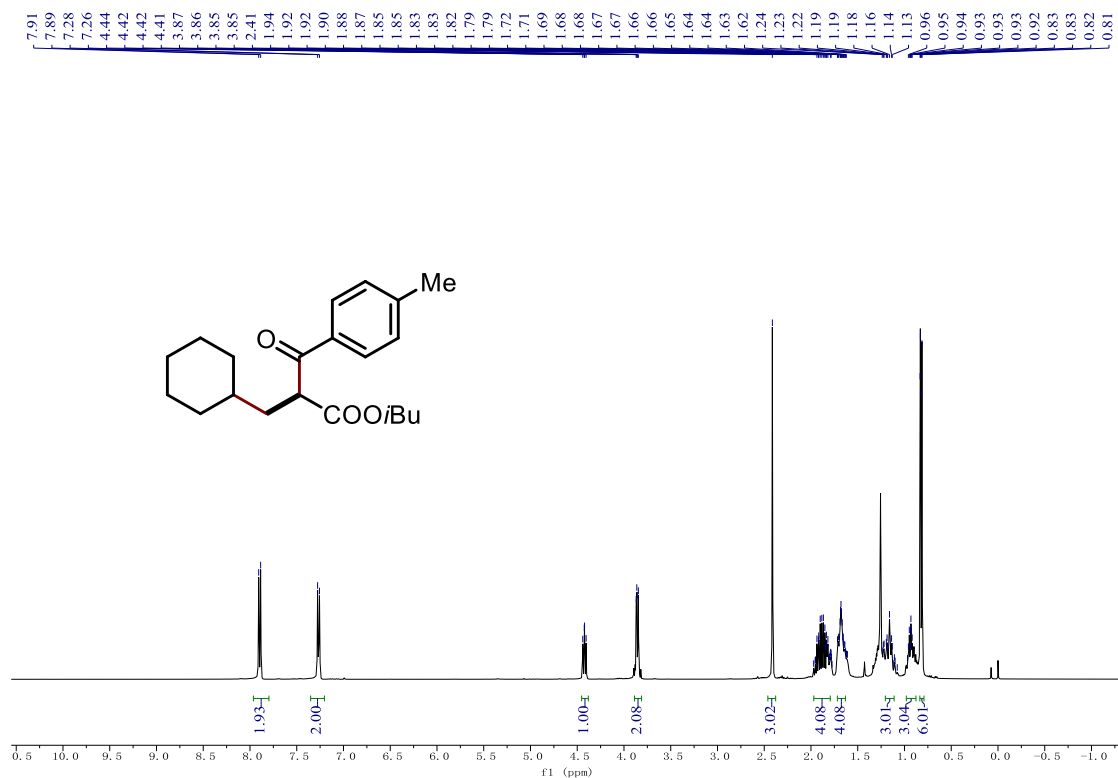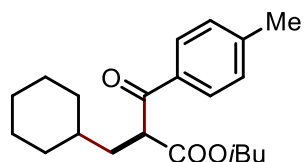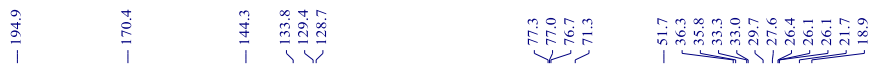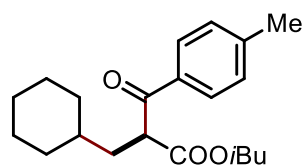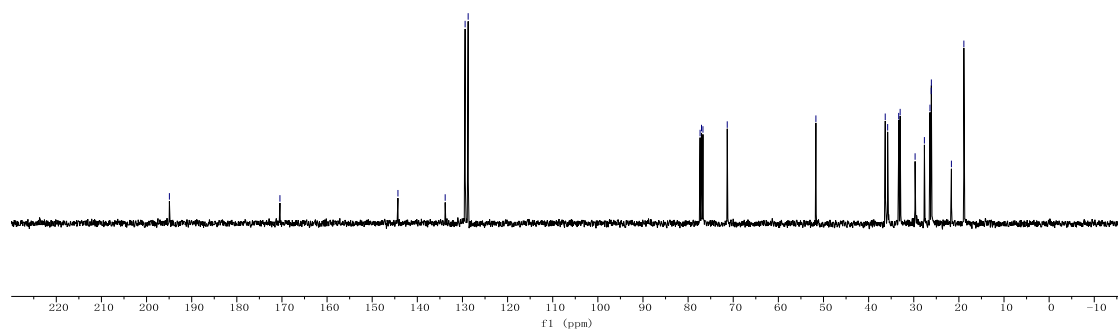

# Cyclohexyl 2-(cyclohexylmethyl)-3-oxo-3-(p-tolyl)propanoate (29)

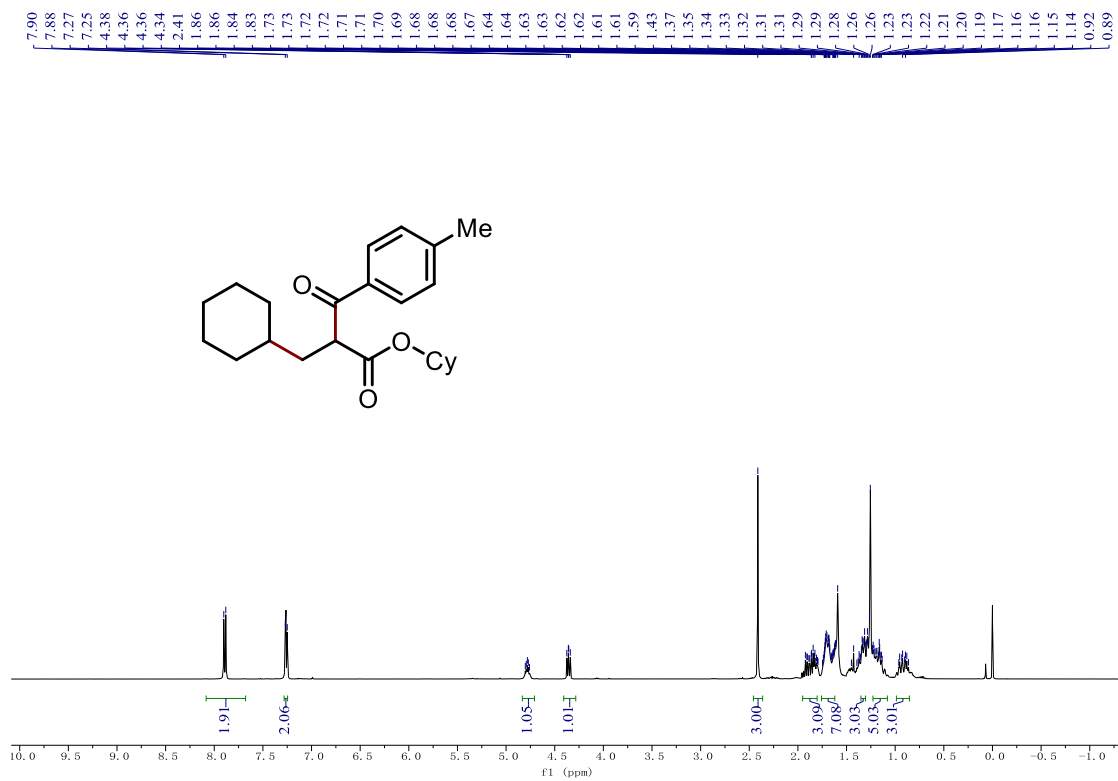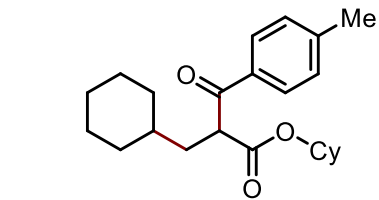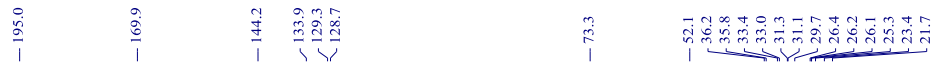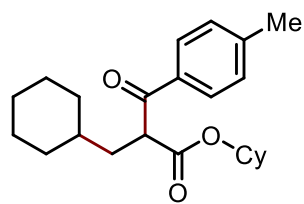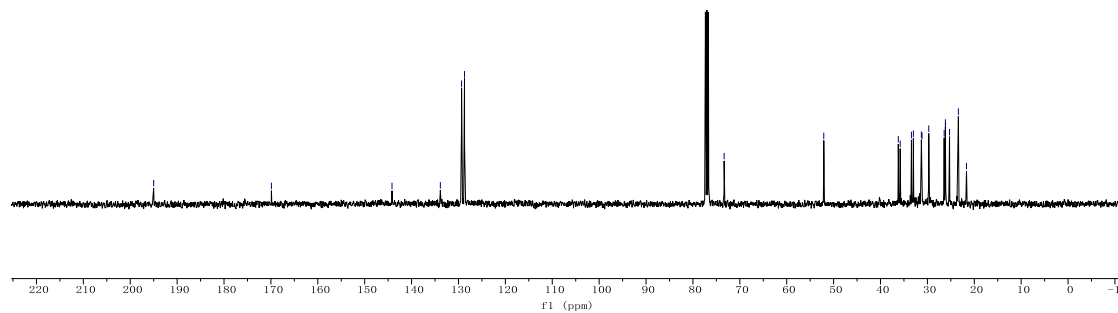

# Benzyl 2-(cyclohexylmethyl)-3-oxo-3-(p-tolyl)propanoate (30)

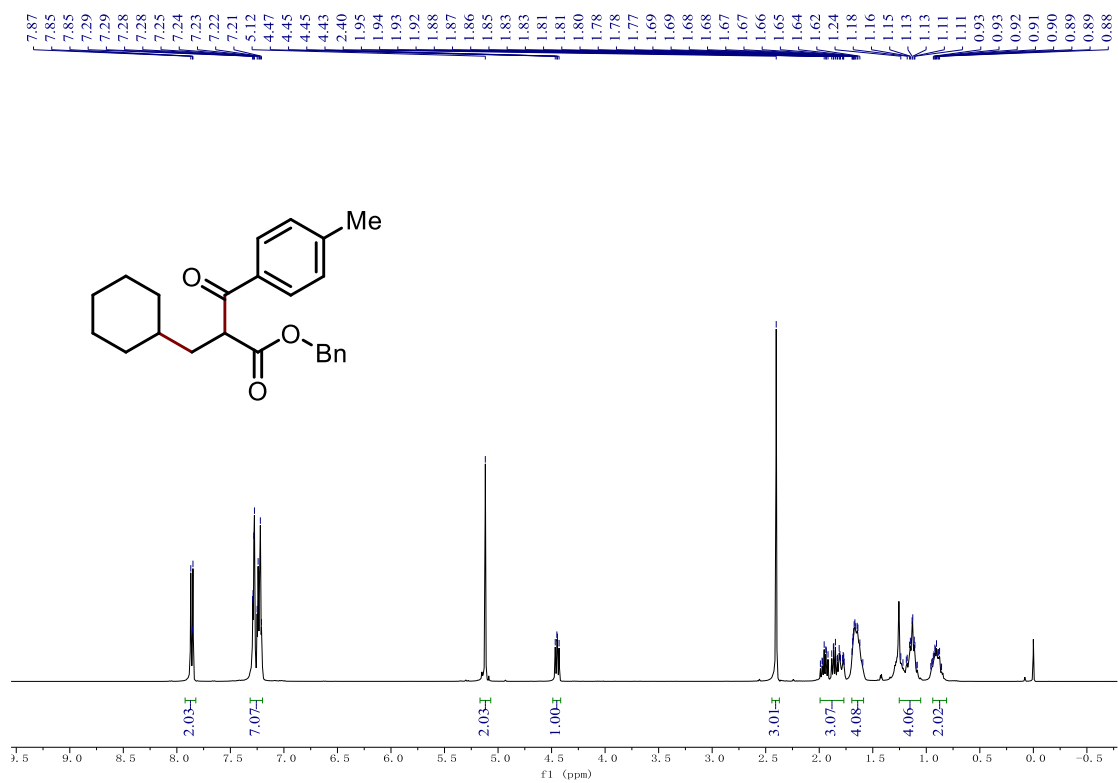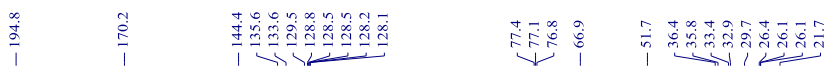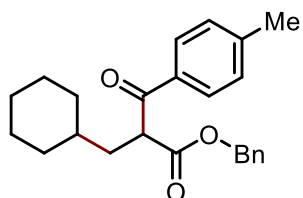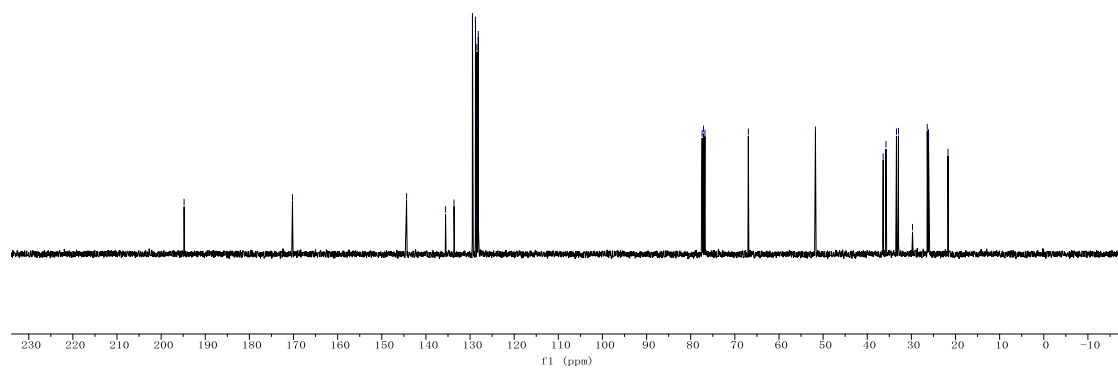

**Phenyl 2-(cyclohexylmethyl)-3-oxo-3-(p-tolyl)propanoate (31)**

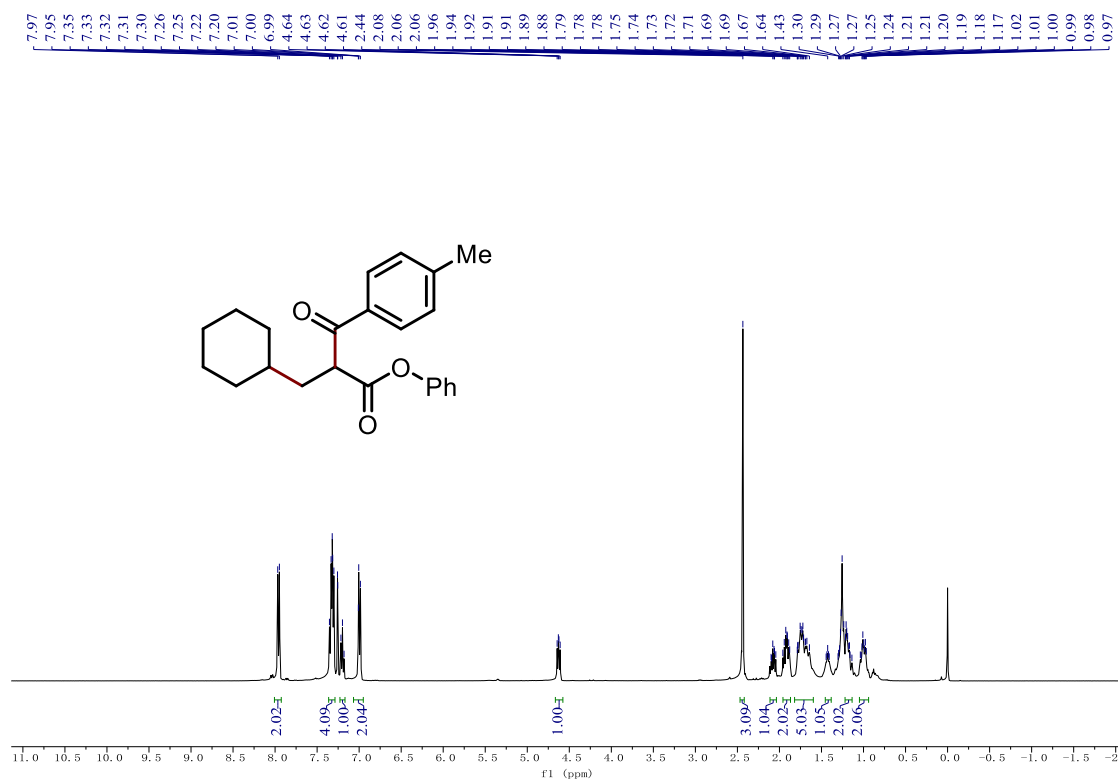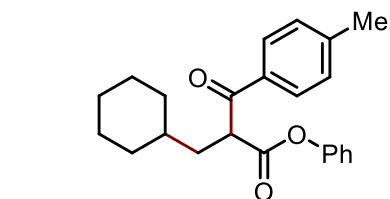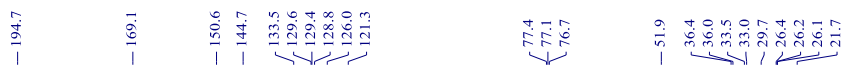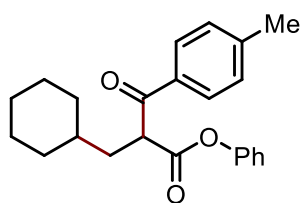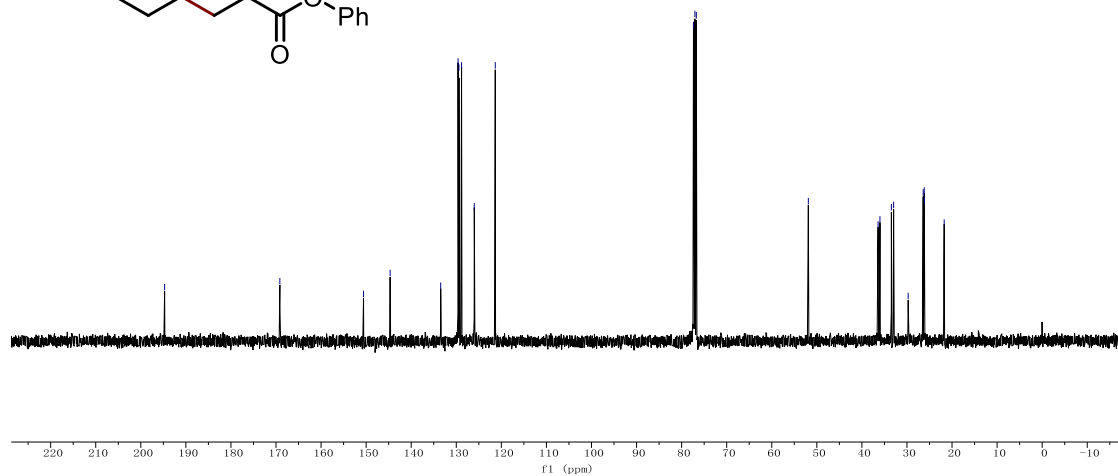



# Allyl 2-(cyclohexylmethyl)-3-oxo-3-(p-tolyl)propanoate (32)

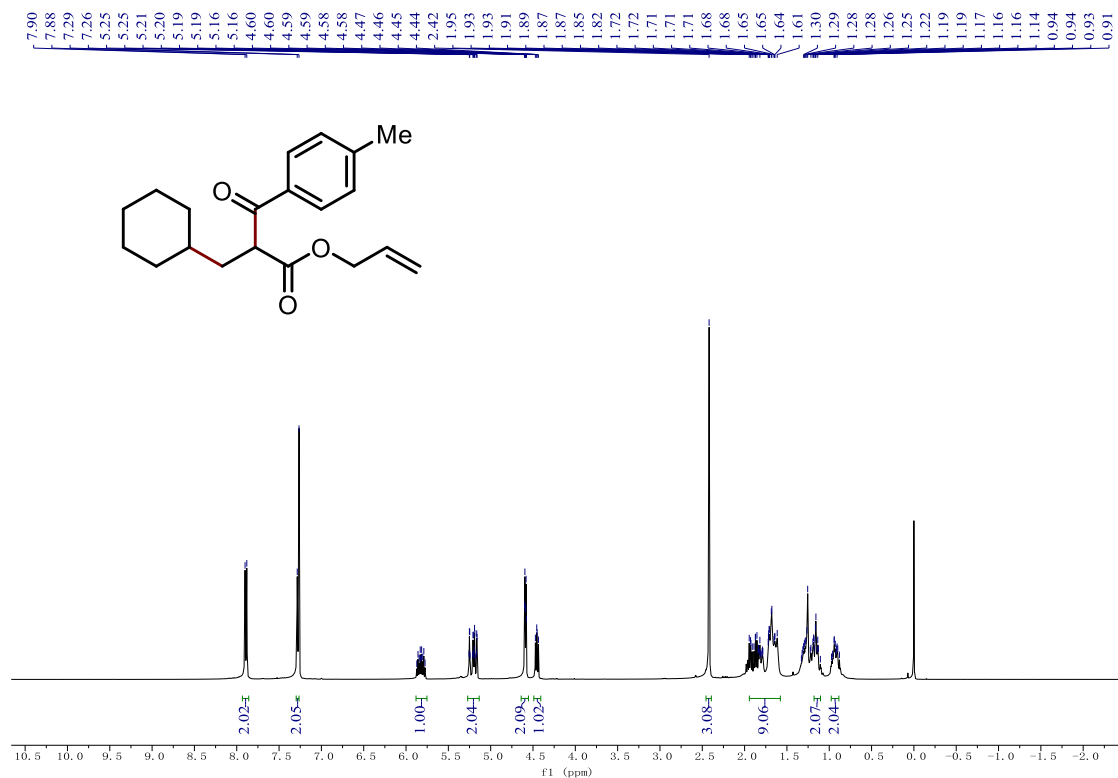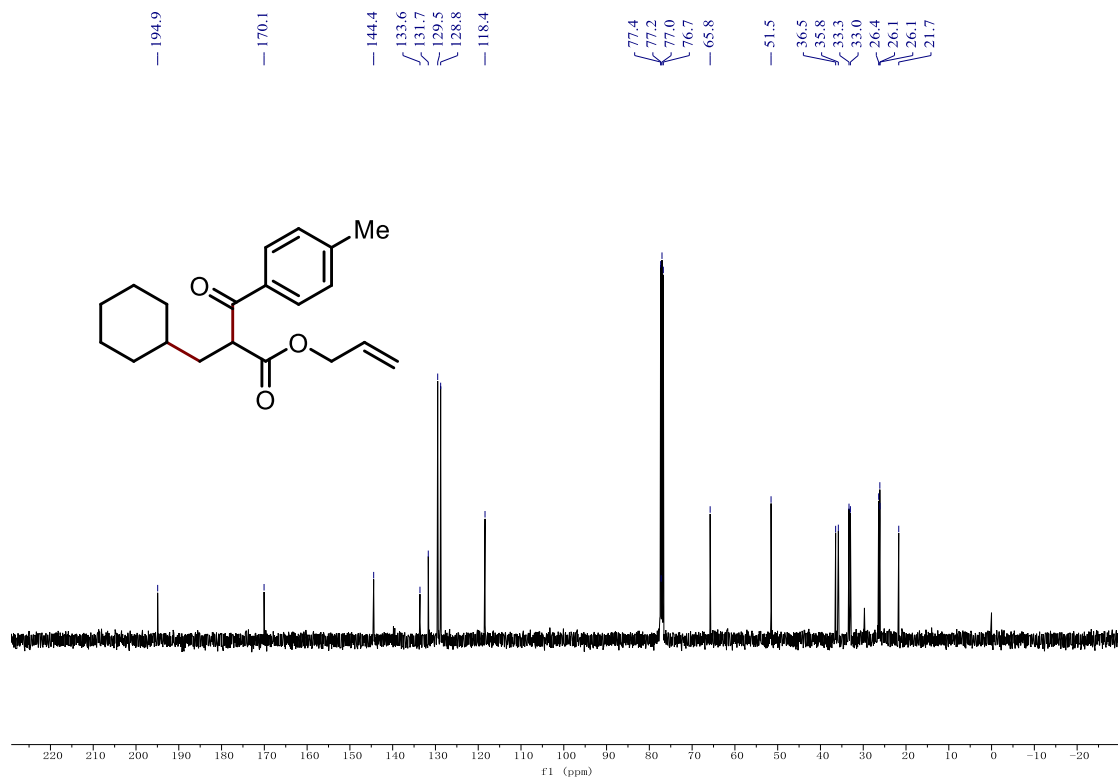

## 2-Chloroethyl 2-(cyclohexylmethyl)-3-oxo-3-(p-tolyl)propanoate (33)

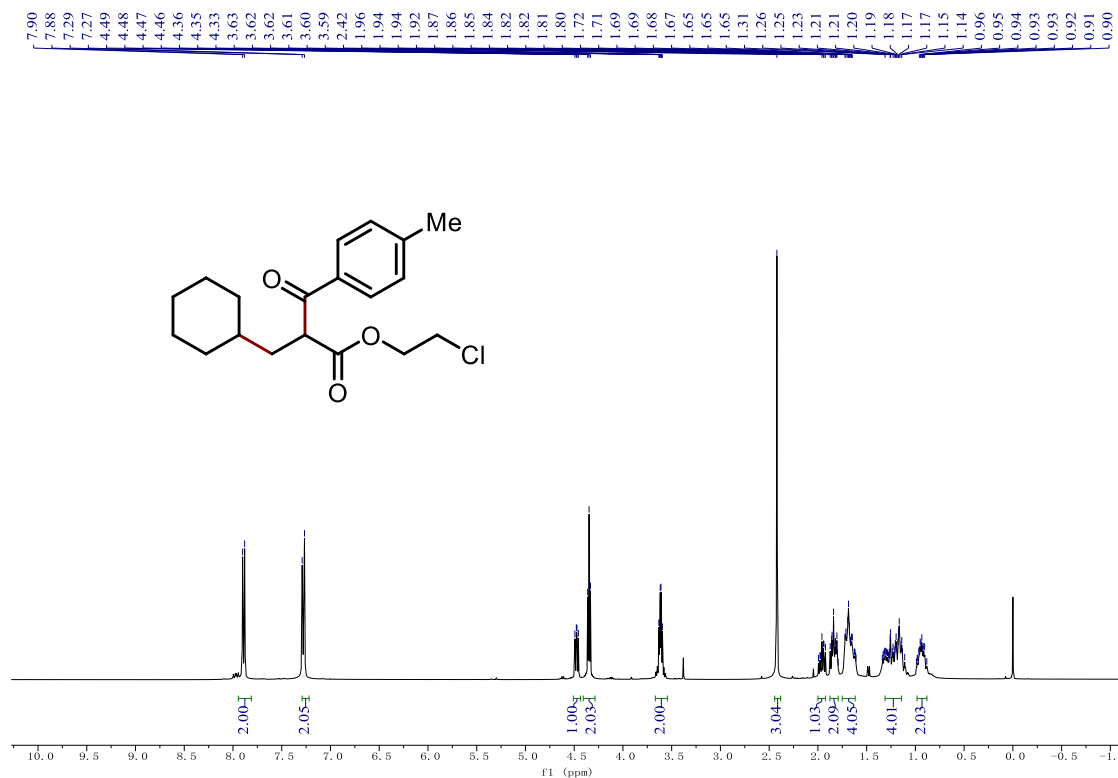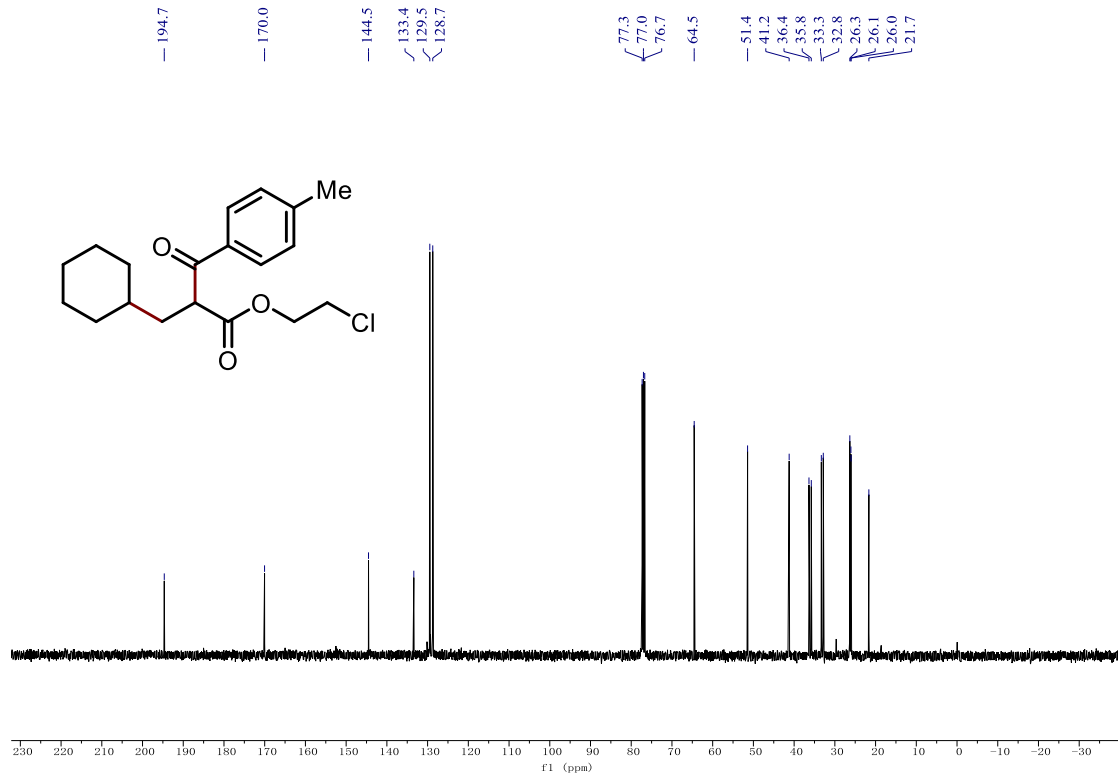

**2,2,2-trifluoroethyl 2-(cyclohexylmethyl)-3-oxo-3-(p-tolyl)propanoate (34)**

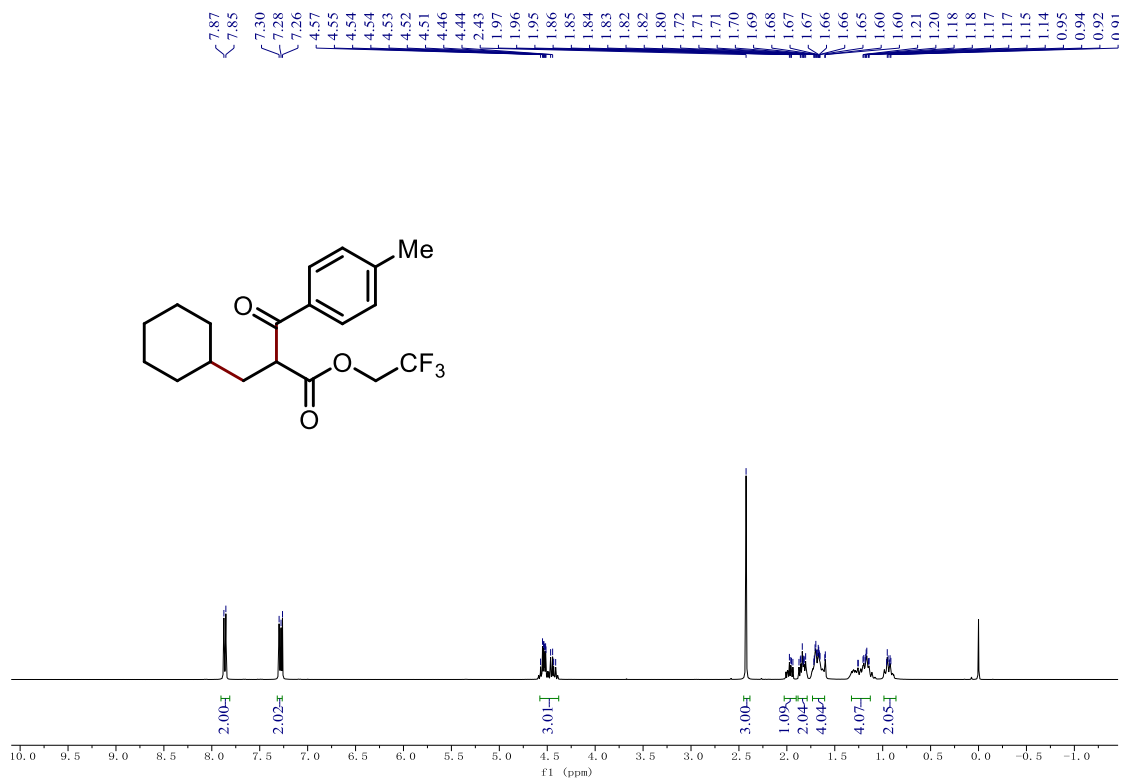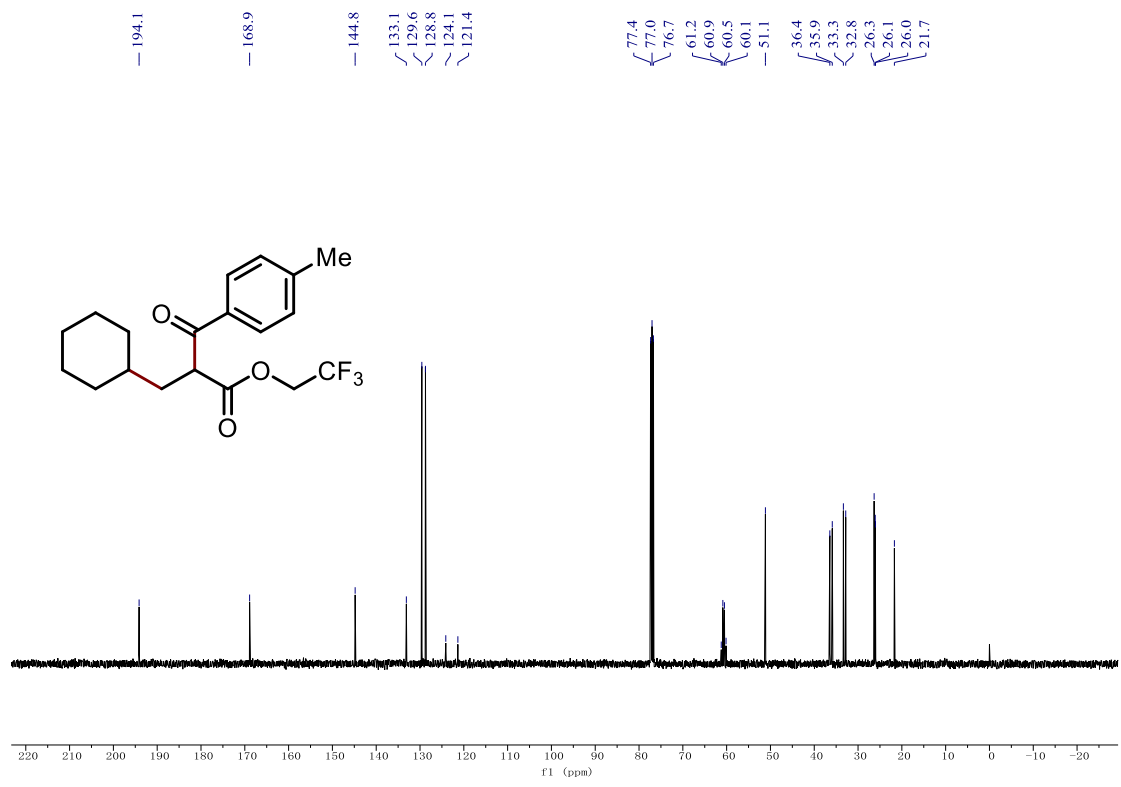

## 2-methoxyethyl 2-(cyclohexylmethyl)-3-oxo-3-(p-tolyl)propanoate (35)

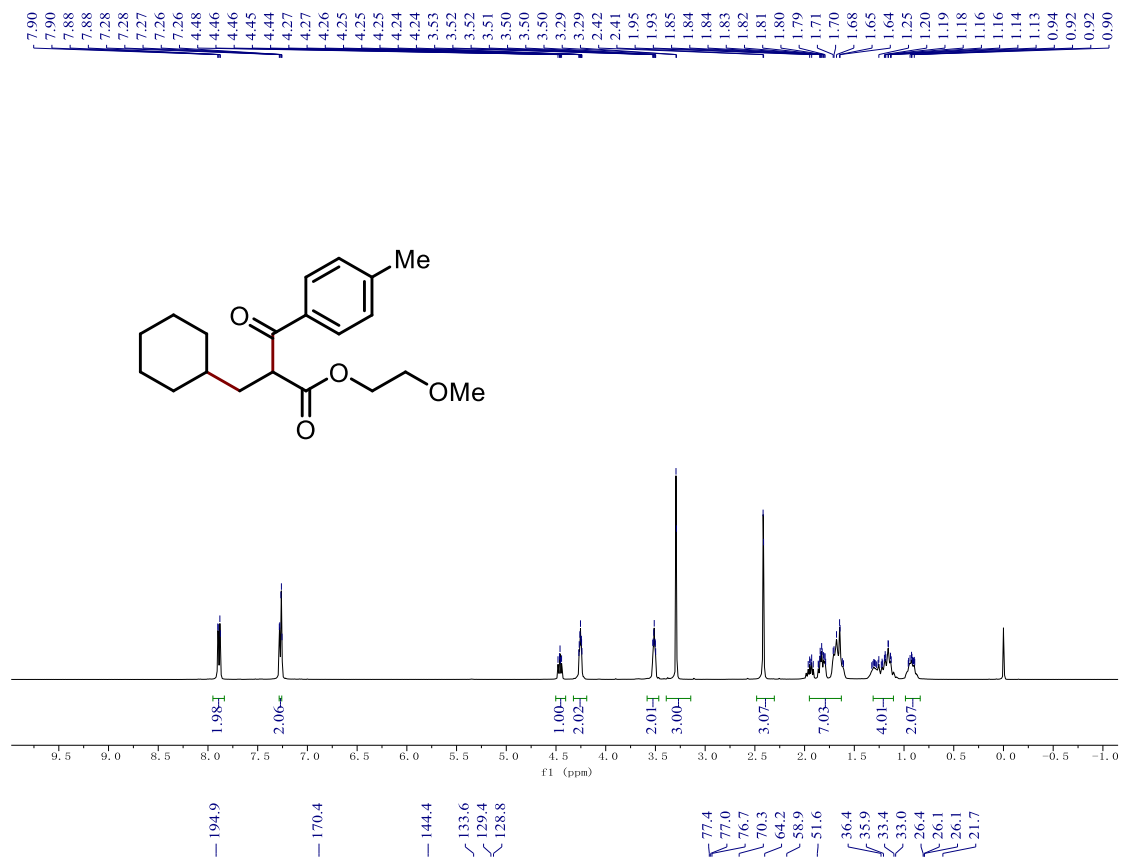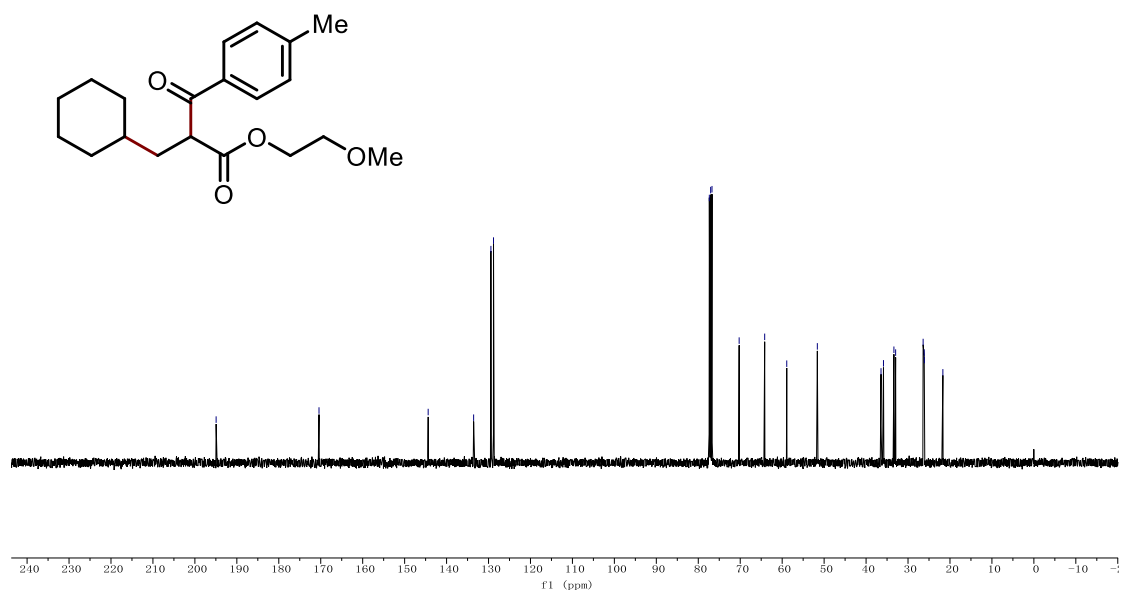

# Diethyl (3-cyclohexyl-1-oxo-1-(p-tolyl)propan-2-yl)phosphonate (36)

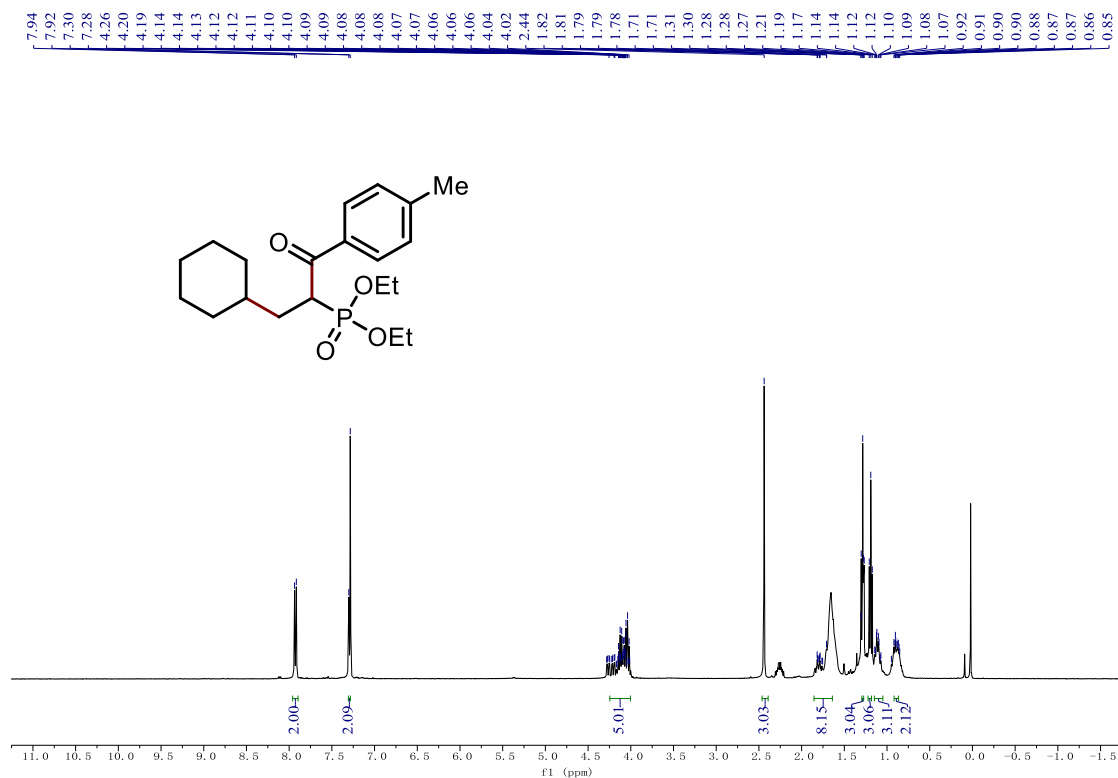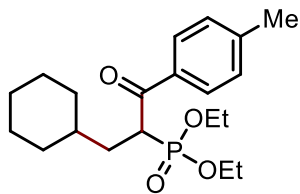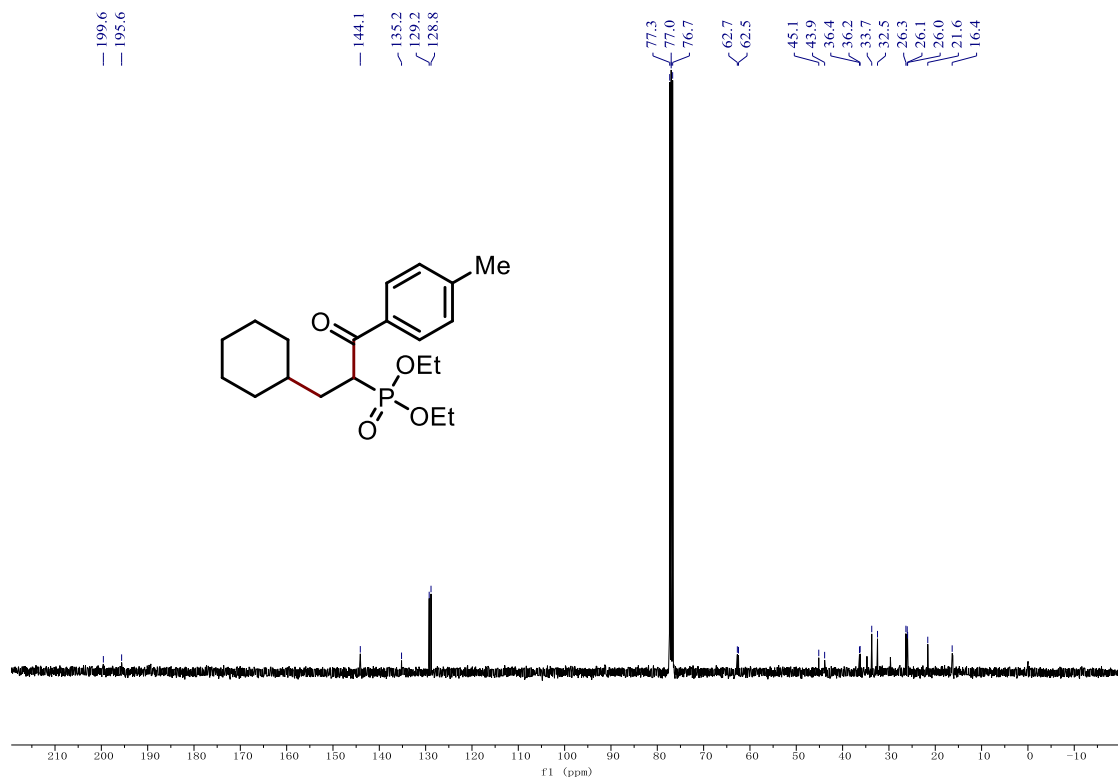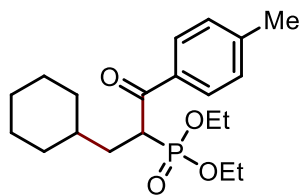

**(1S,2R,5S)-2-isopropyl-5-methylcyclohexyl 2-(cyclohexylmethyl)-3-oxo-3-(p-tolyl)propanoate**  
**(37)**

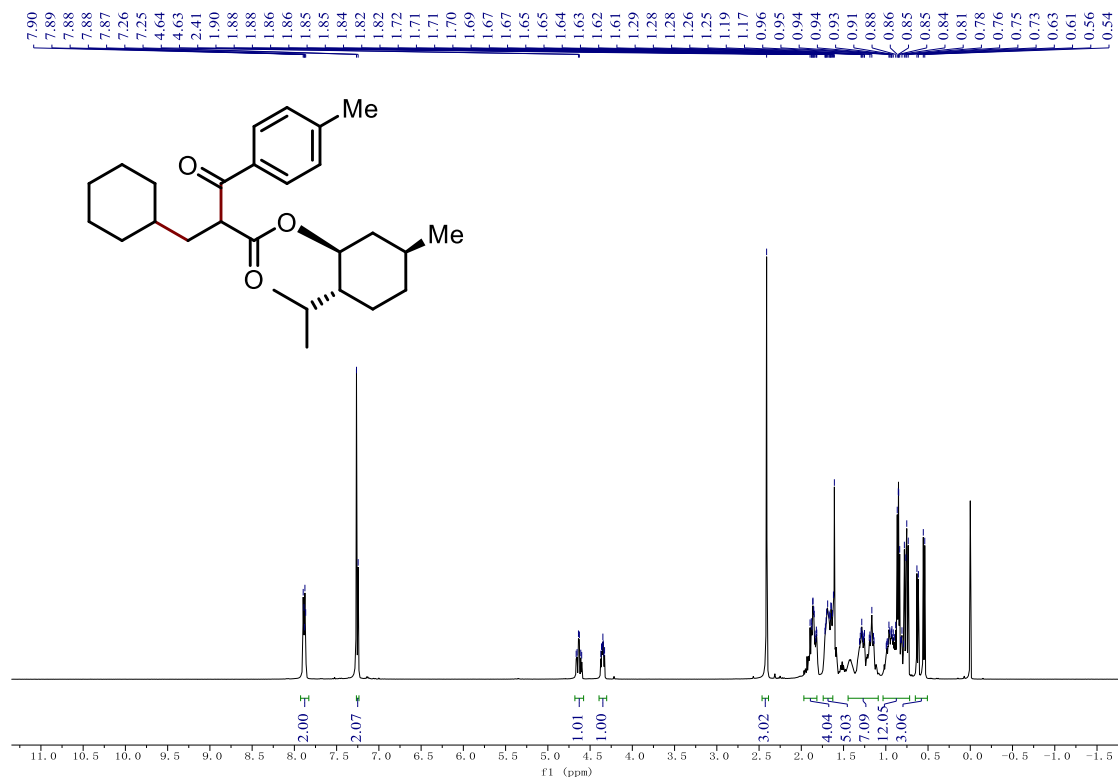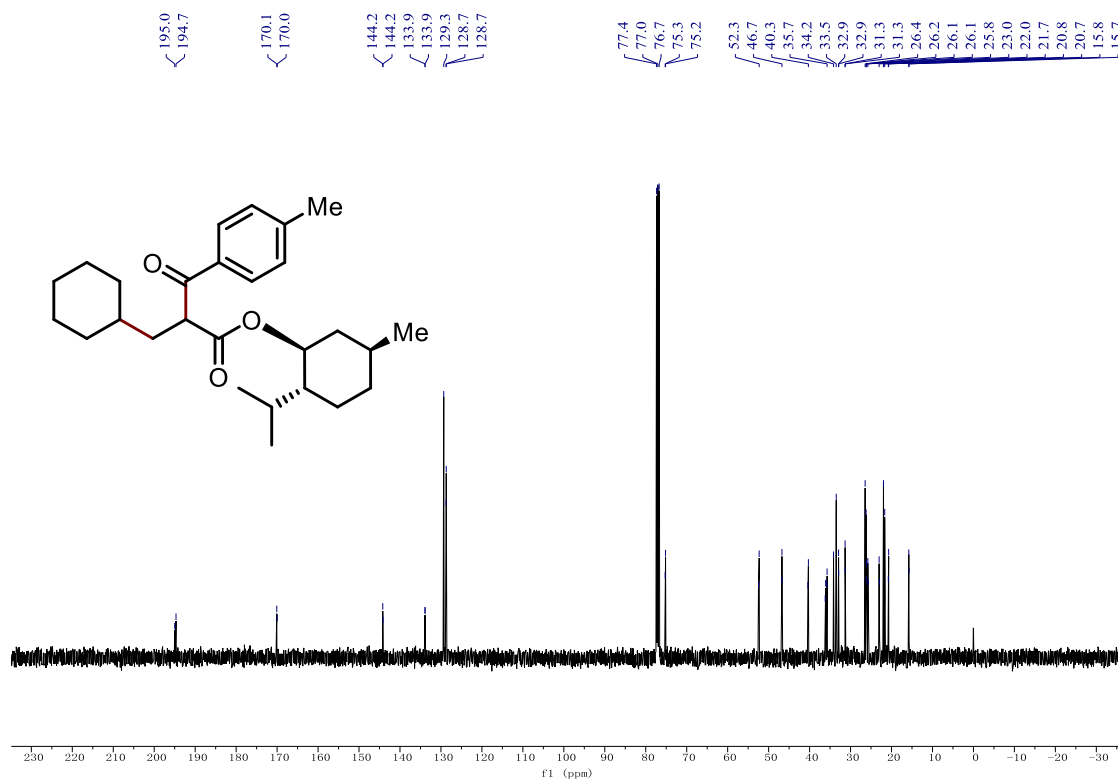

# Methyl 3-oxo-3-(p-tolyl)-2-((triphenylsilyl)methyl)propanoate (38)

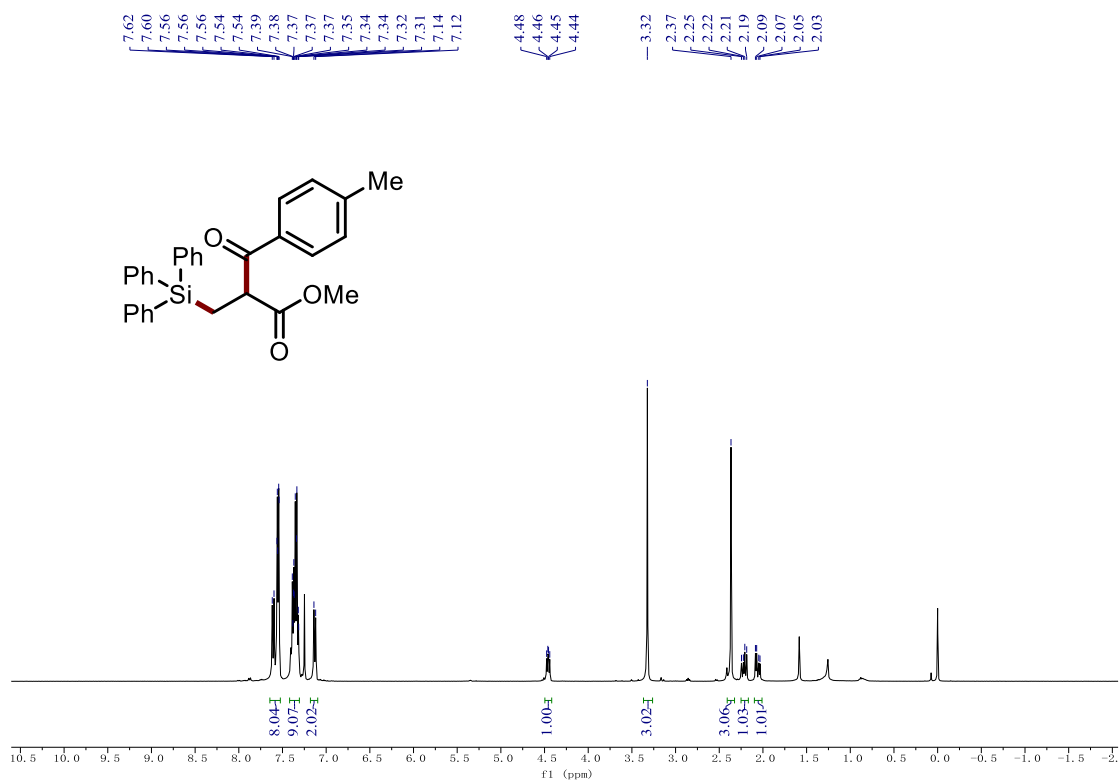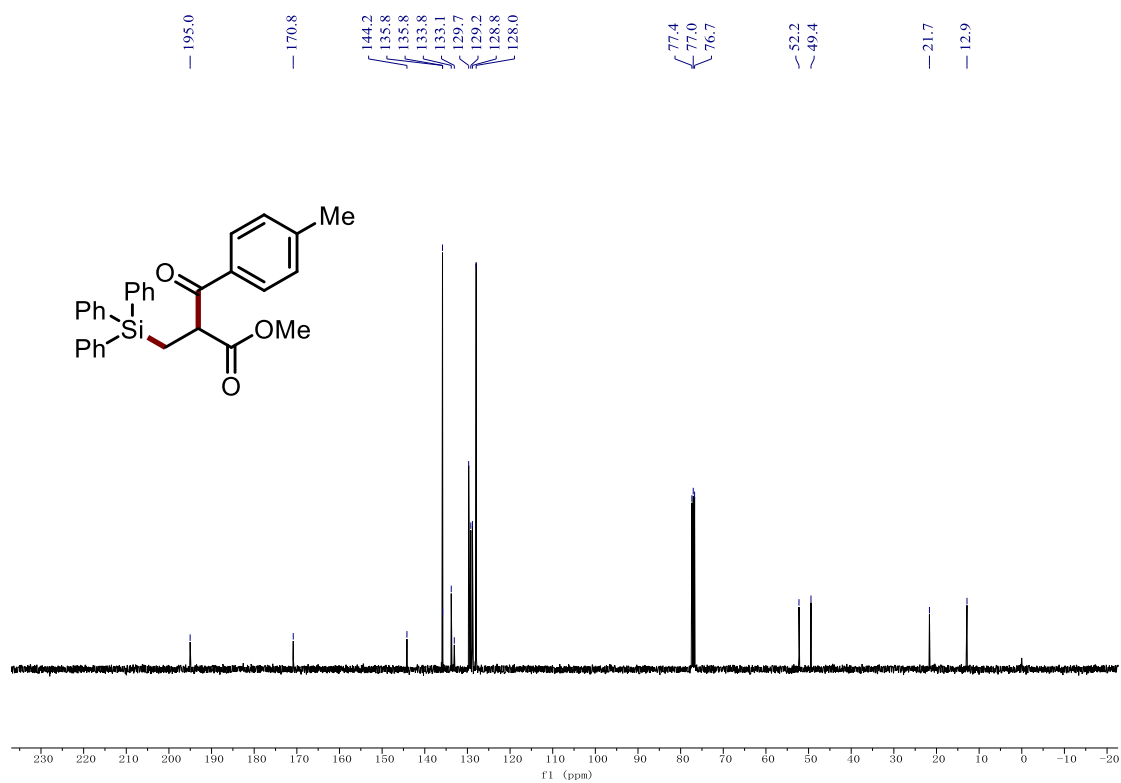

# Methyl 3-oxo-3-(p-tolyl)-2-((triphenylsilyl)methyl)propanoate (40)

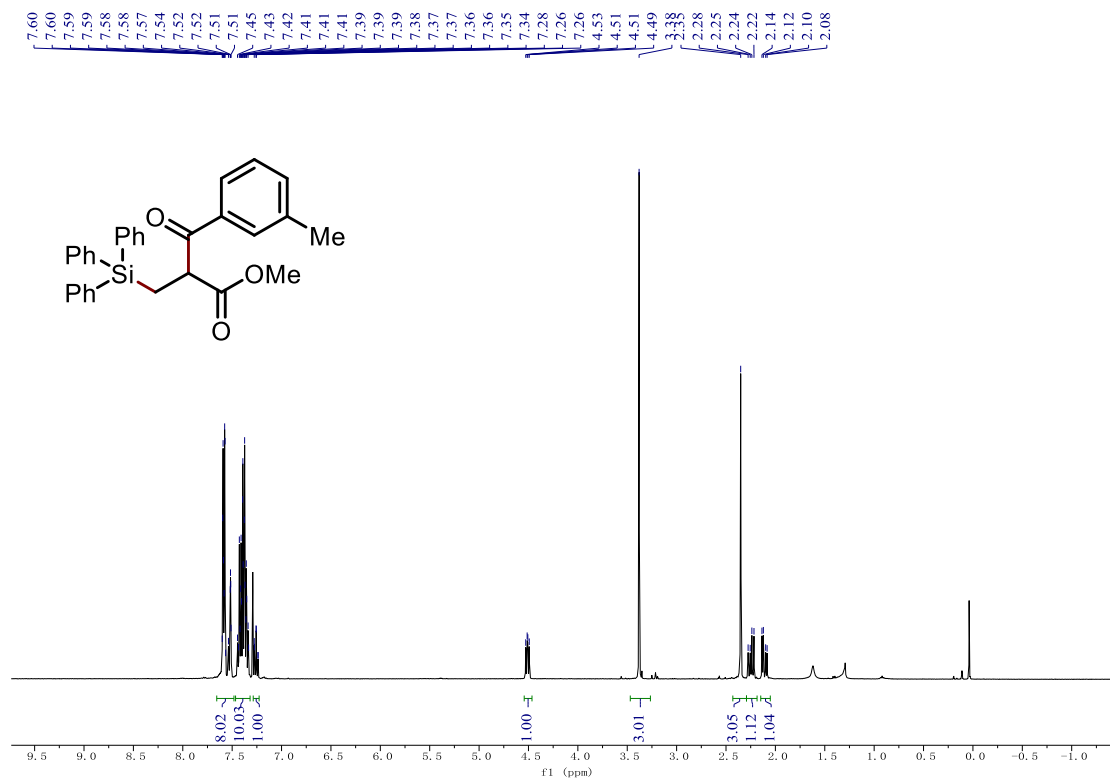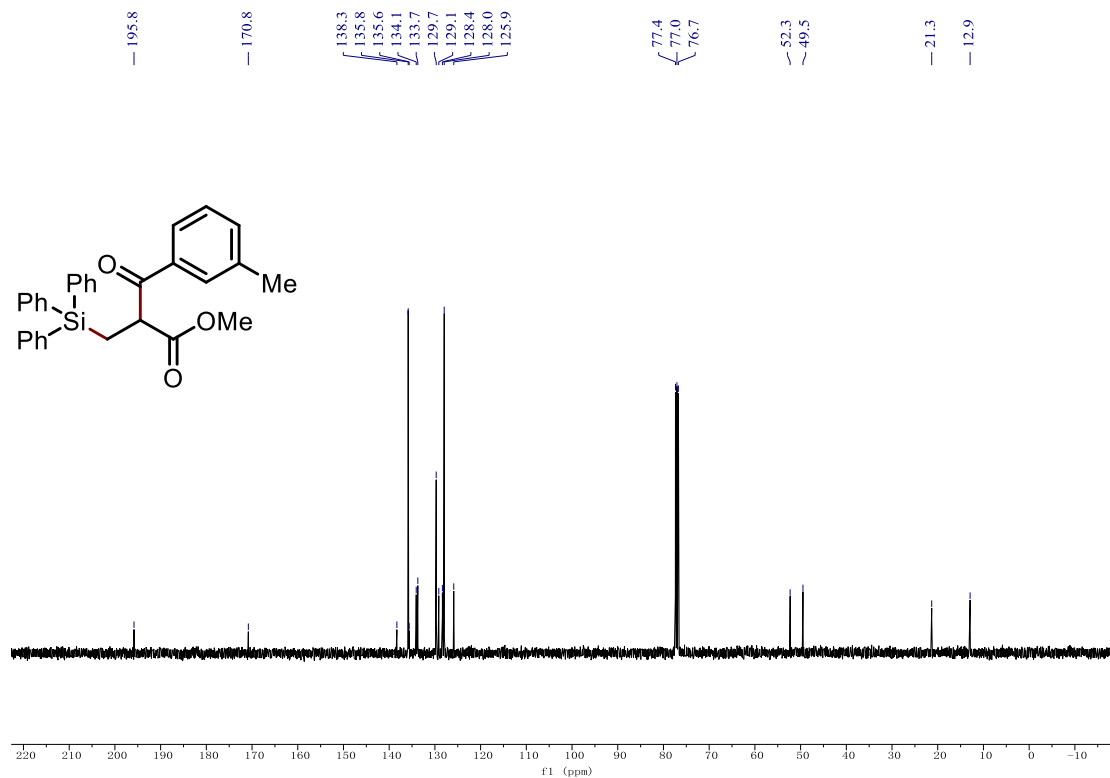



**Methyl 3-(4-fluorophenyl)-3-oxo-2-((triphenylsilyl)methyl)propanoate (39)**

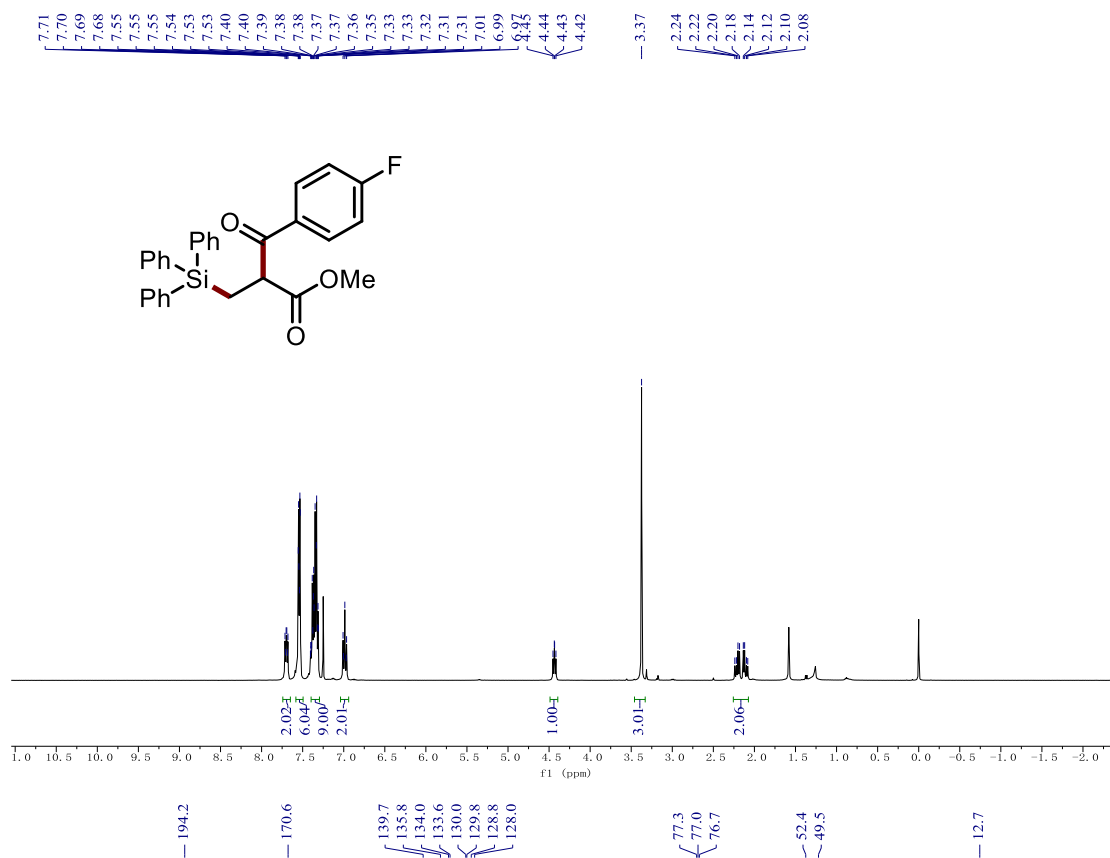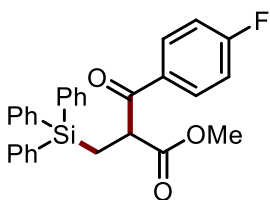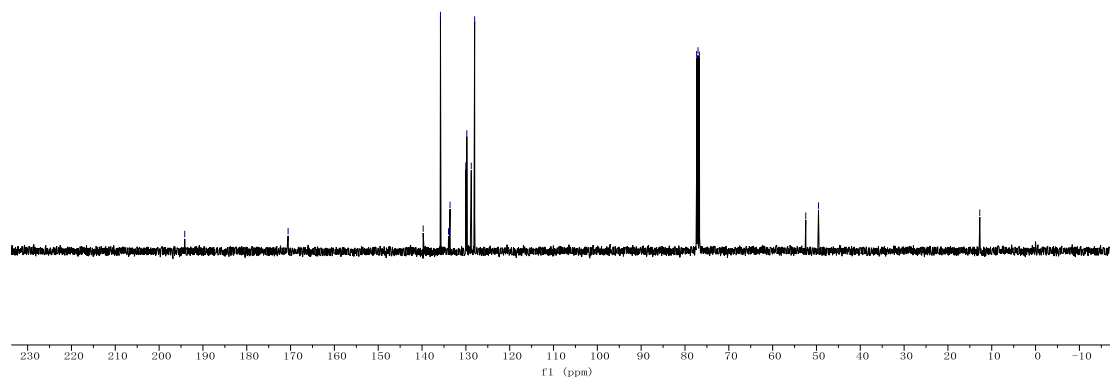

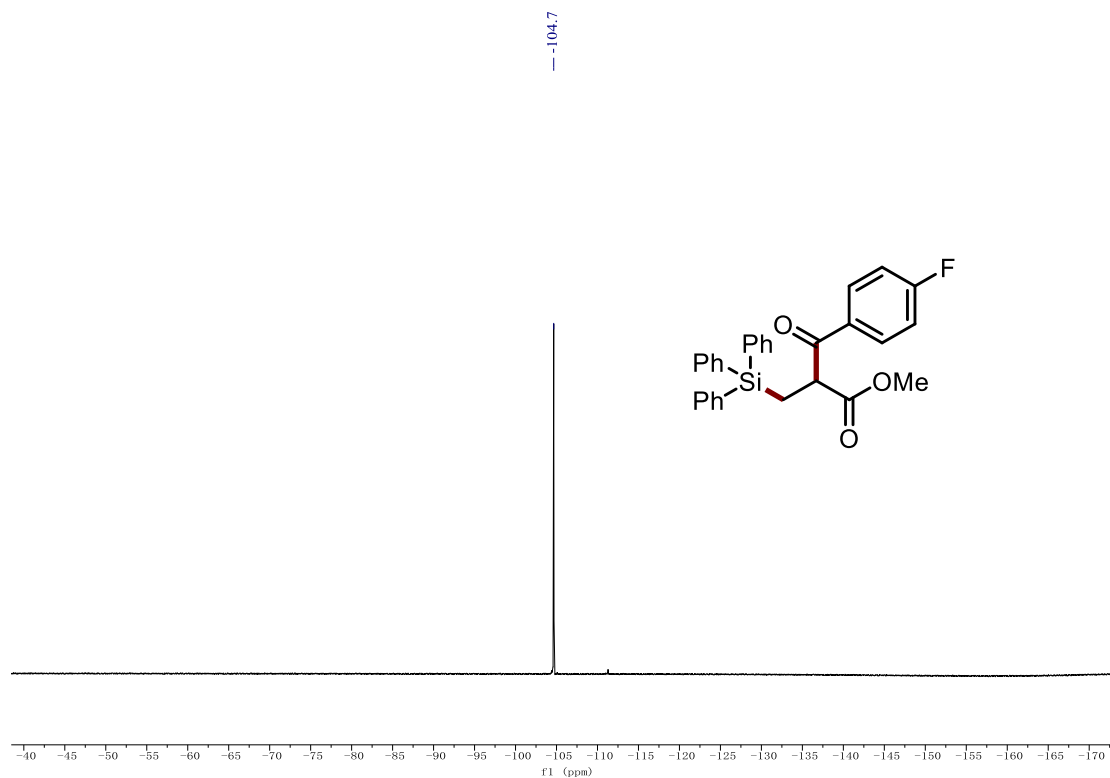

### Methyl 3-(4-chlorophenyl)-3-oxo-2-((triphenylsilyl)methyl)propanoate (40)

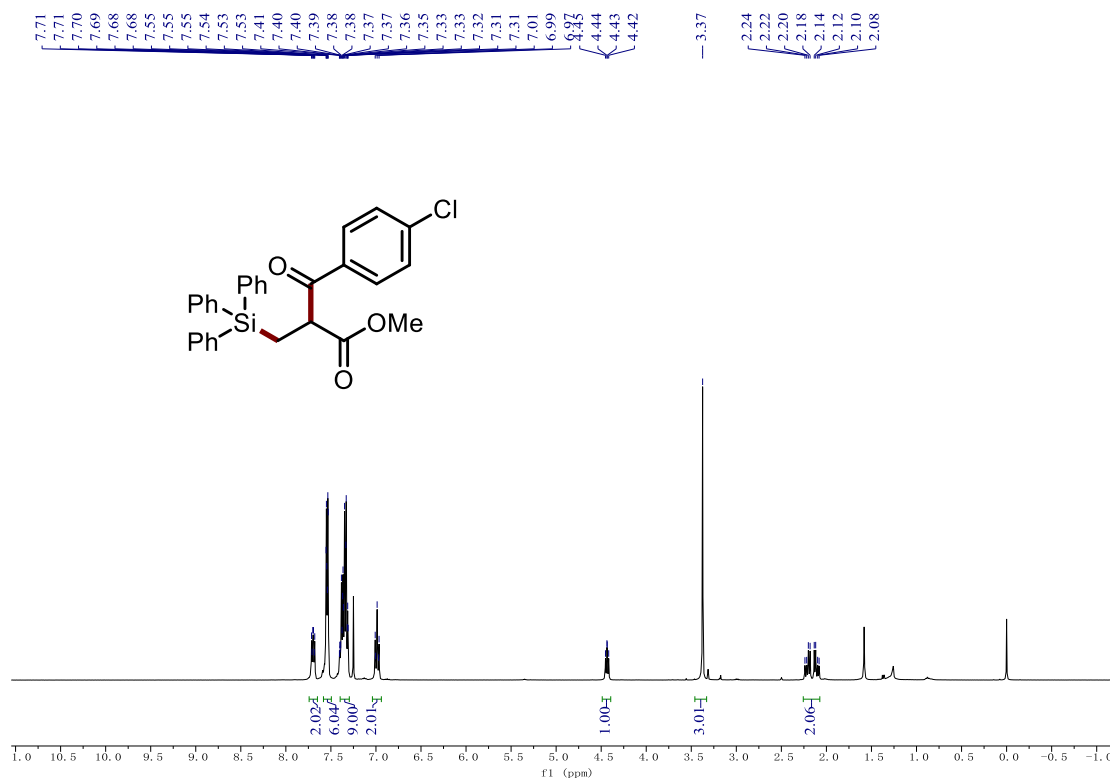

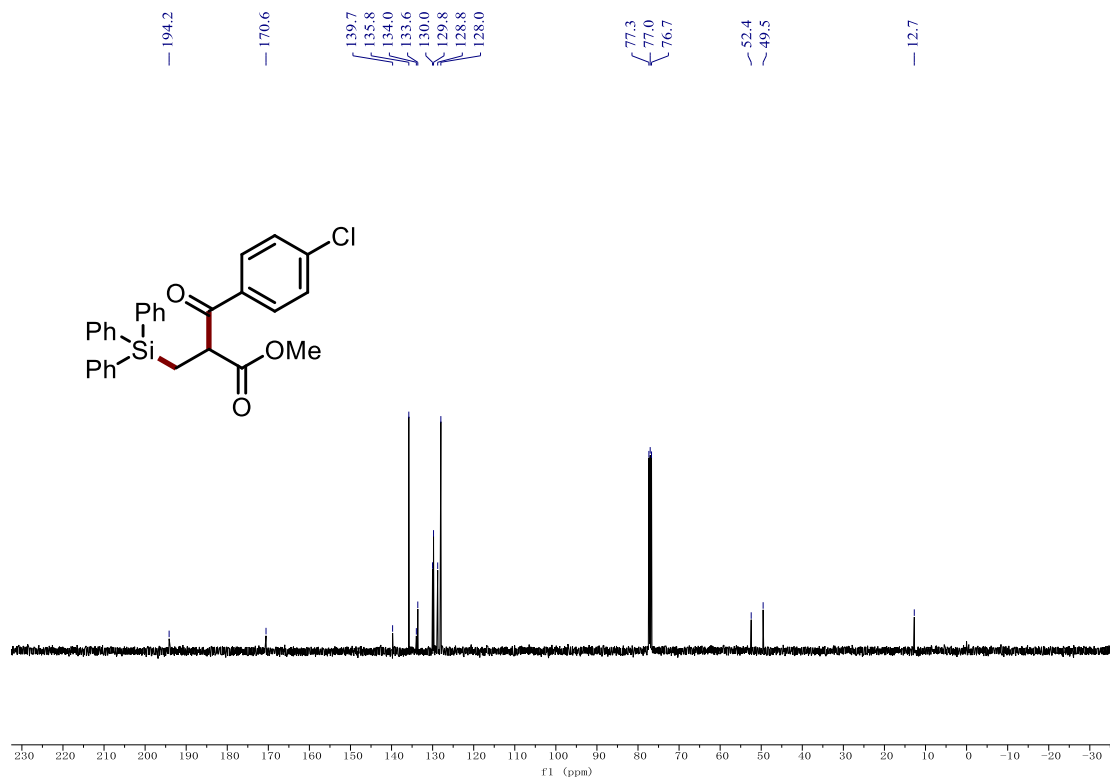

### Isobutyl 3-oxo-3-(p-tolyl)-2-((triphenylsilyl)methyl)propanoate (42)

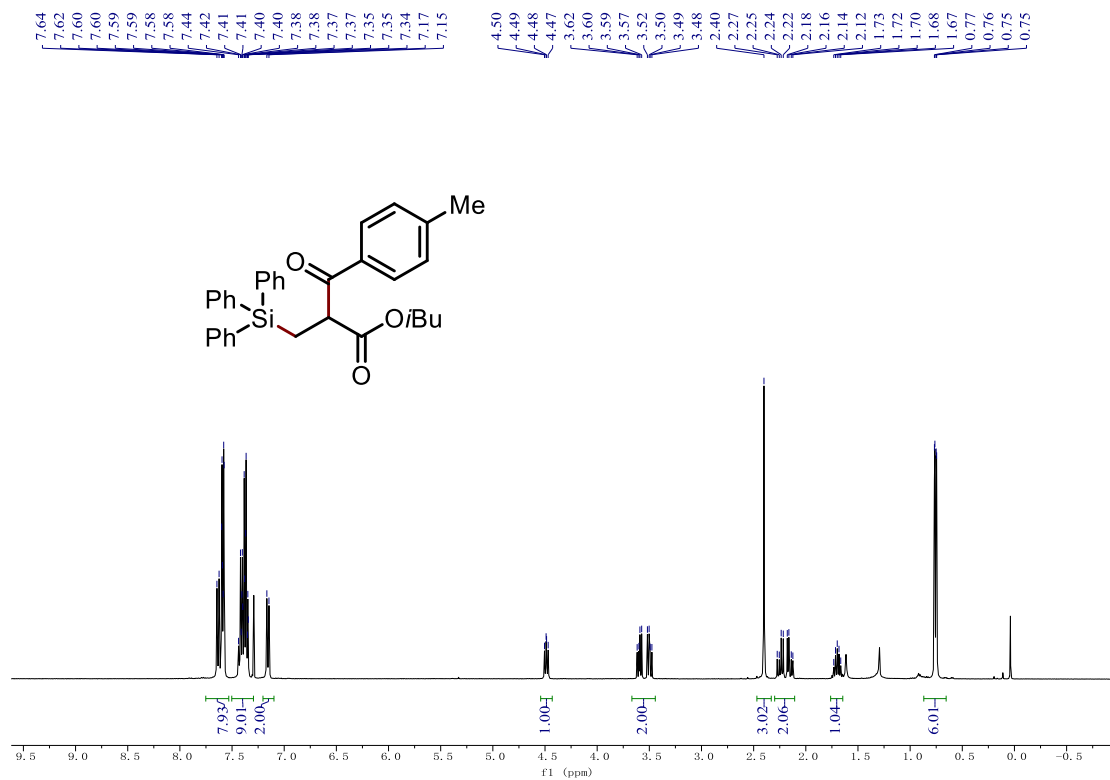

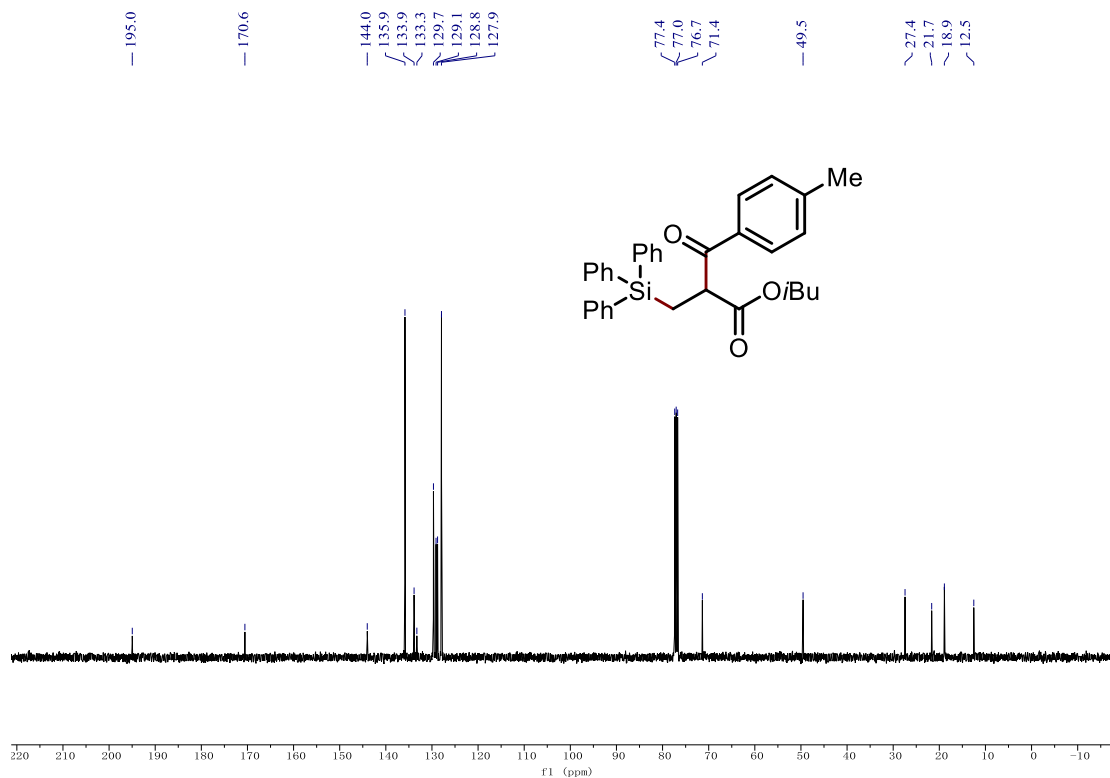

### Cyclohexyl 3-oxo-3-(p-tolyl)-2-((triphenylsilyl)methyl)propanoate (43)

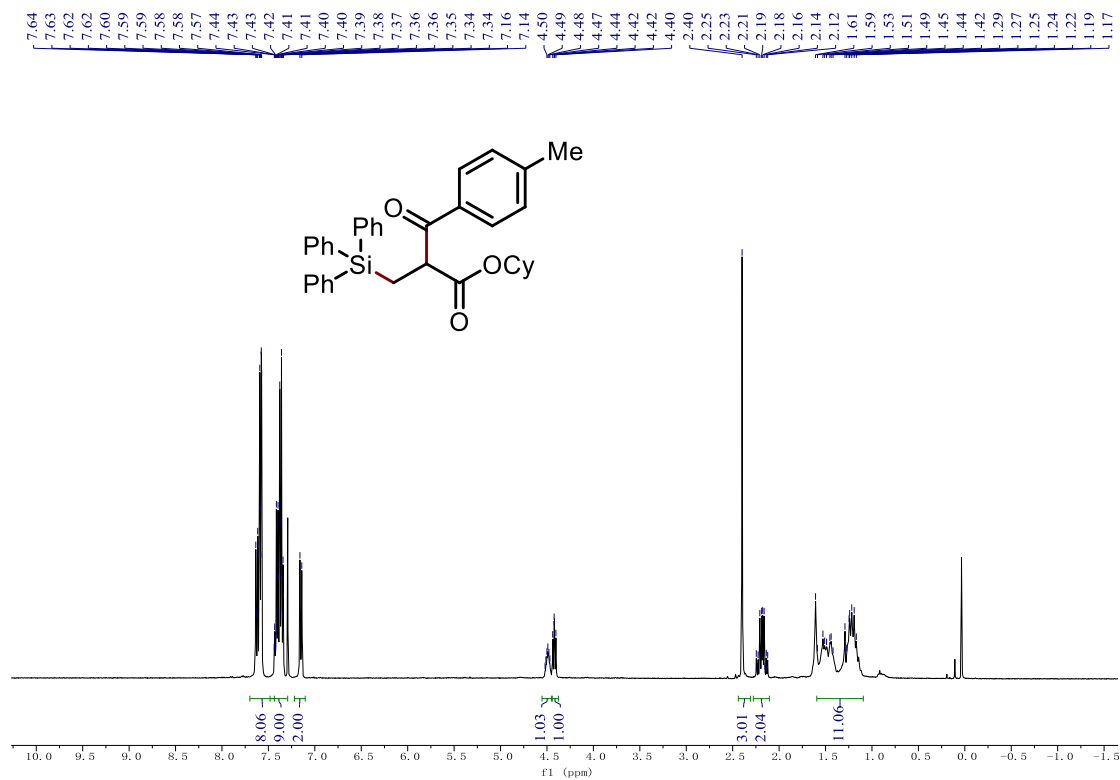

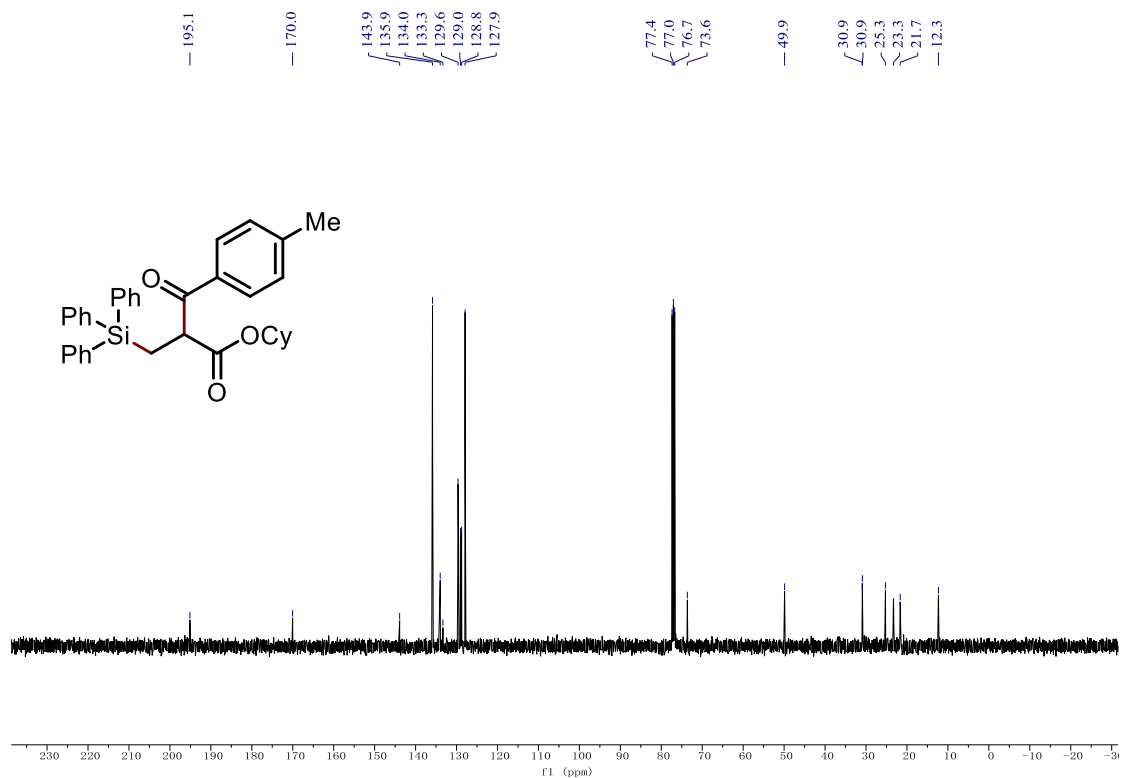

### Benzyl 3-oxo-3-(p-tolyl)-2-((triphenylsilyl)methyl)propanoate (44)

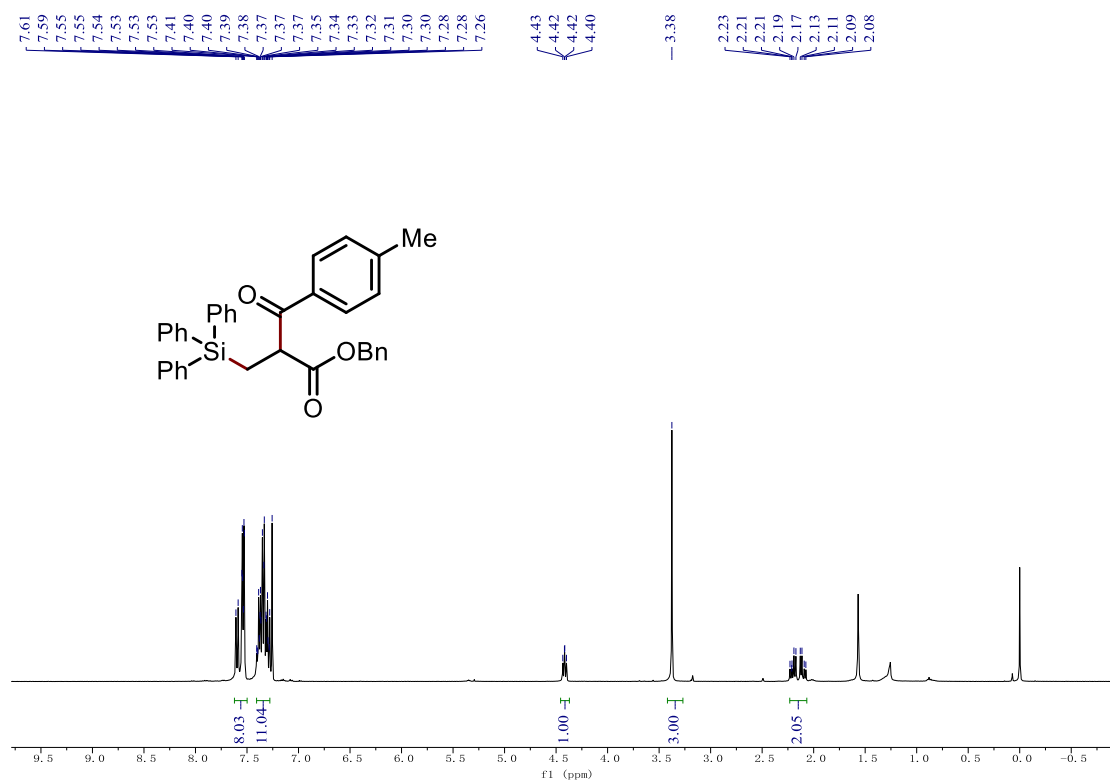

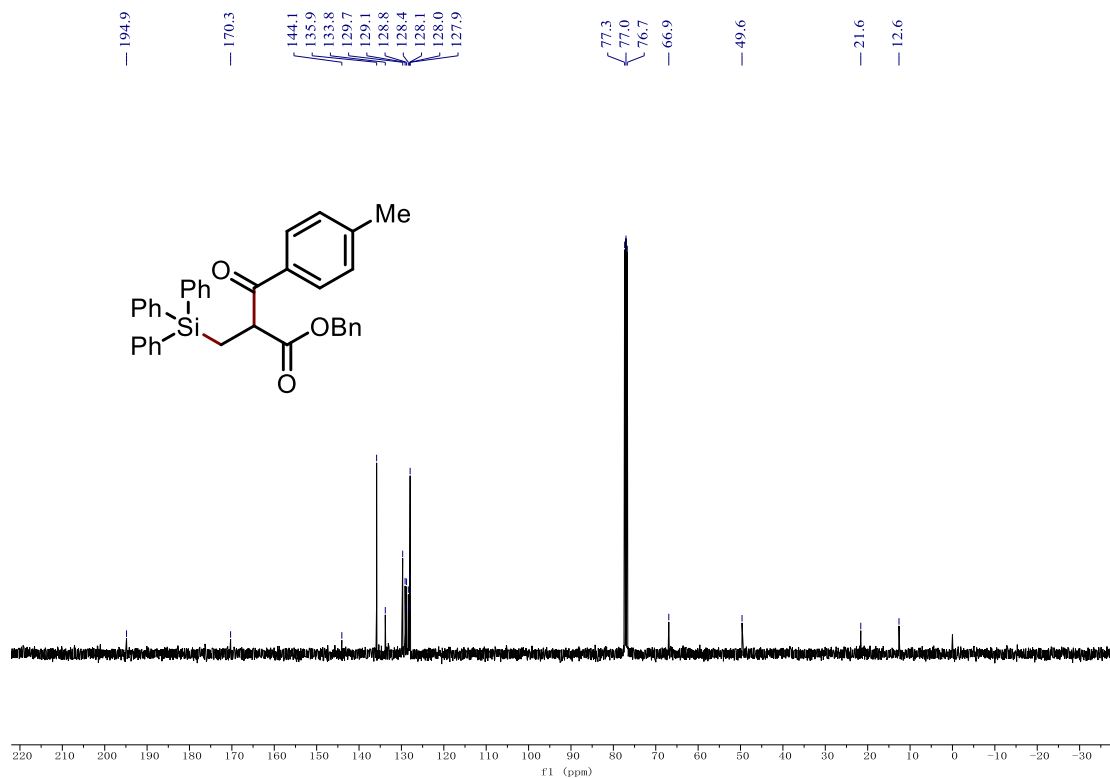

### 3-oxo-3-(p-tolyl)-2-((triphenylsilyl)methyl)propanoate (45)

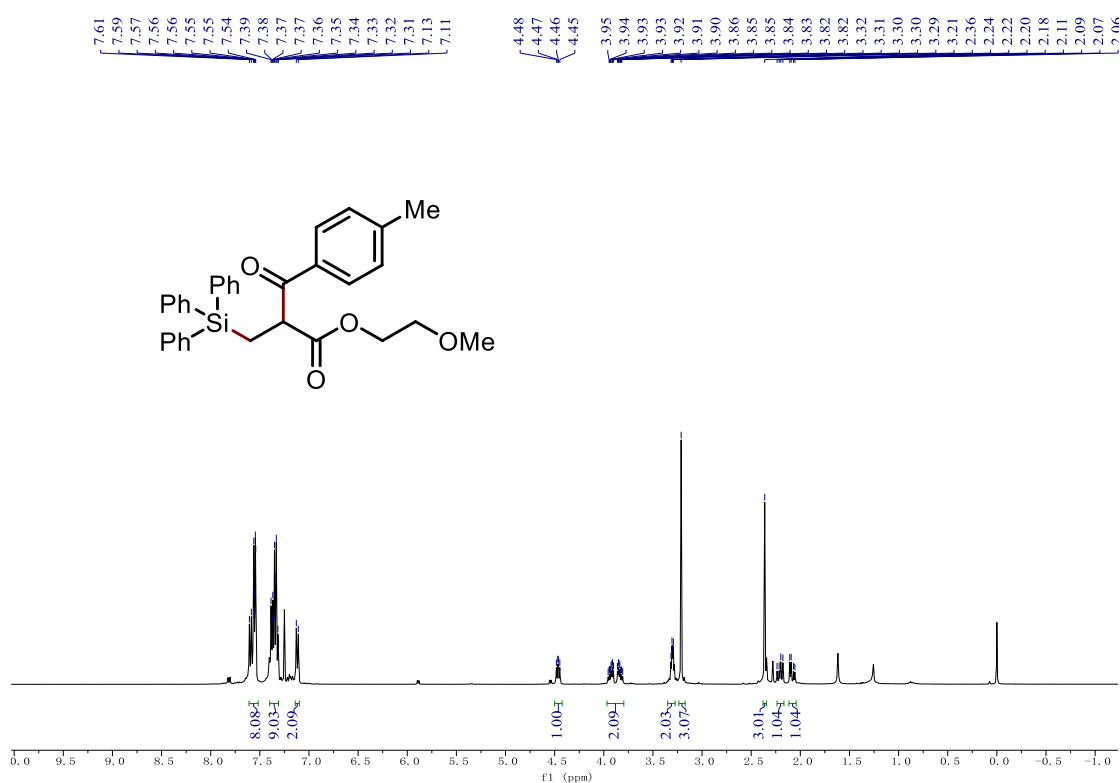

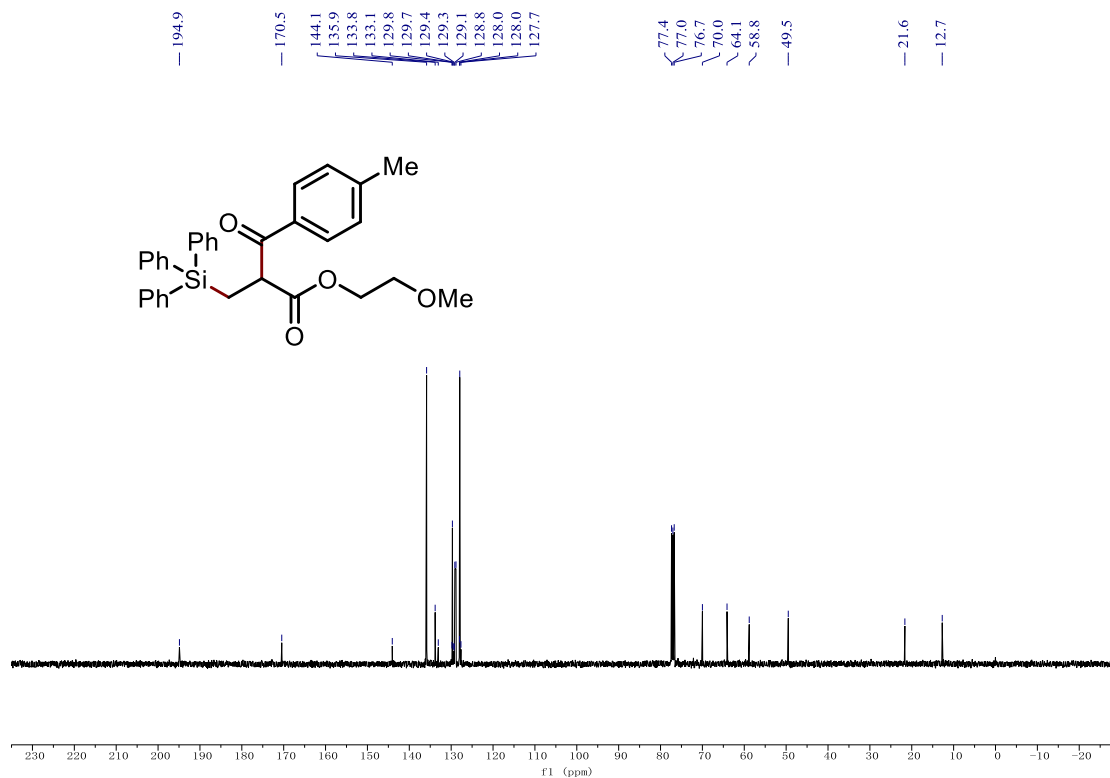

### Methyl 2-((methyldiphenylsilyl)methyl)-3-oxo-3-(p-tolyl)propanoate (46)

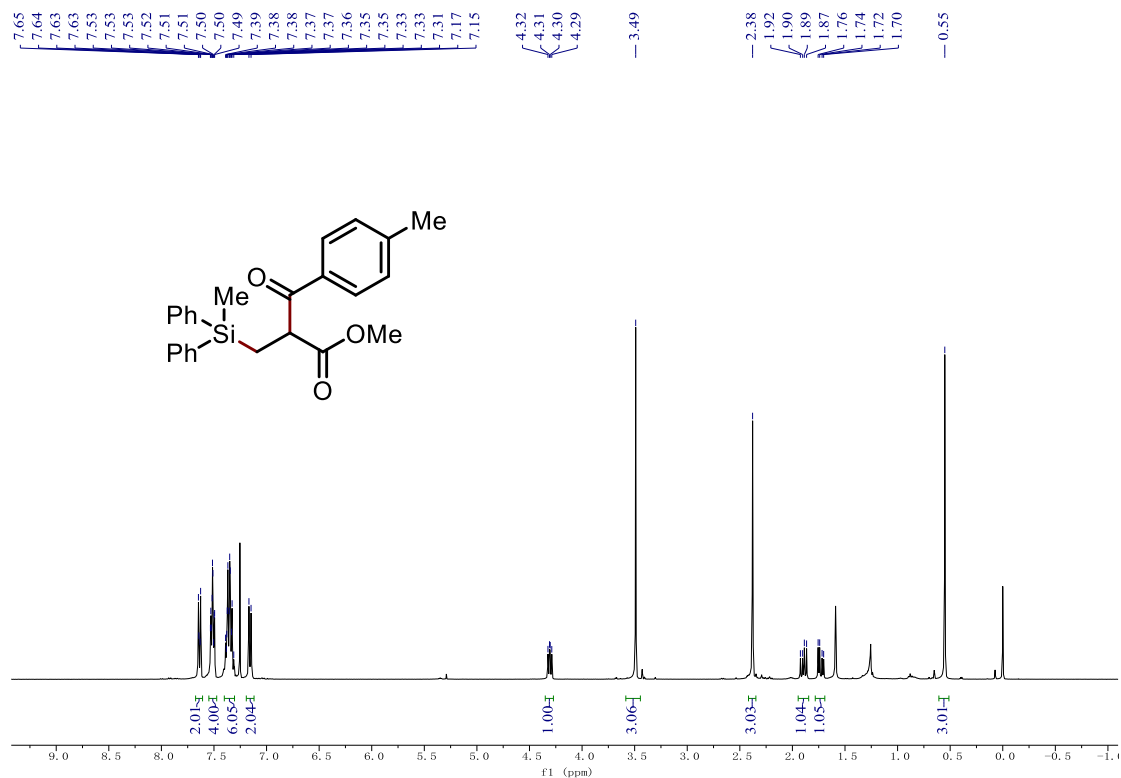

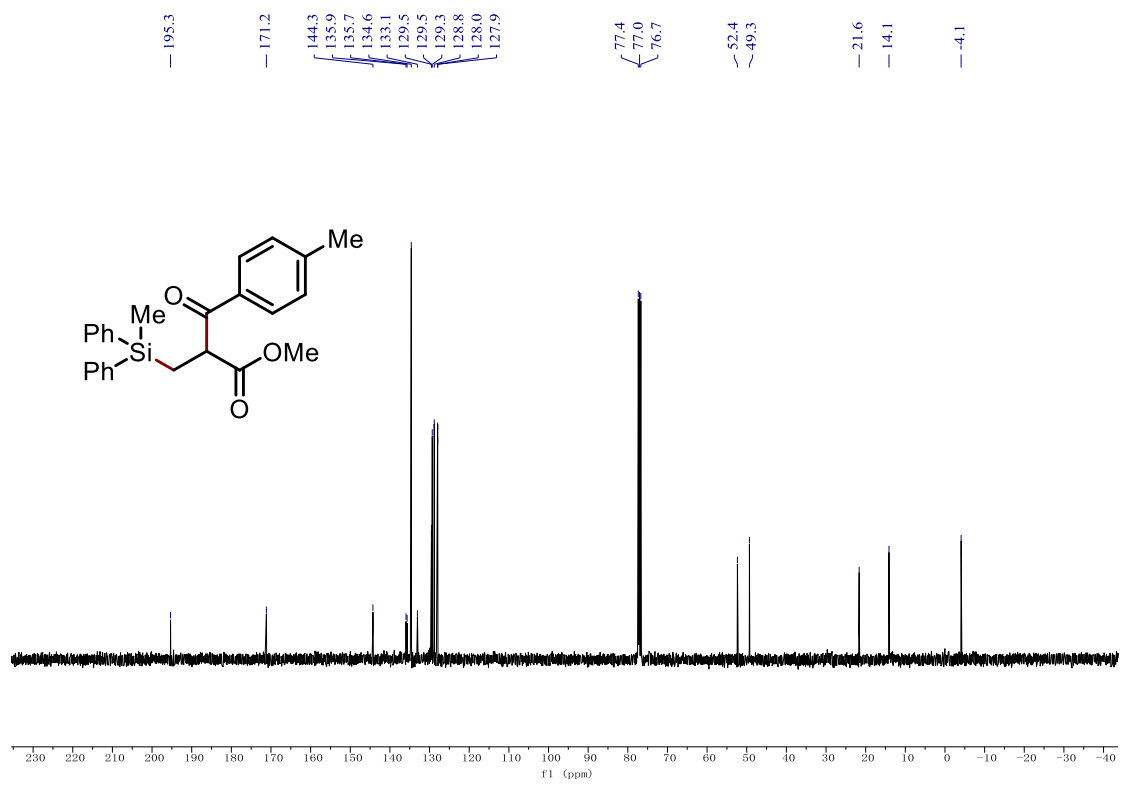

Supplement: d3gc04109c1.pdf [file d3gc04109c1.pdf]
